# Supplementary material for: Core outcome measurement set for research and clinical practice in post-COVID-19 condition (long COVID) in children and young people: an international Delphi consensus study “PC-COS Children”
Source: PubMed Central journal article supplement — Eur Respir J. 2024 Mar 14;63(3):2301761. doi: 10.1183/13993003.01761-2023 (PMC10938351; doi:10.1183/13993003.01761-2023), 2024-03-14

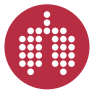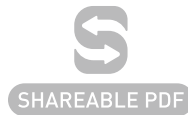

# Core outcome measurement set for research and clinical practice in post-COVID-19 condition (long COVID) in children and young people: an international Delphi consensus study “PC-COS Children”

Nina Seylanova<sup>1,41</sup>, Anastasia Chernyavskaya<sup>2,3,41</sup>, Natalia Degtyareva<sup>4</sup>, Aigun Mursalova<sup>5</sup>, Ali Ajam<sup>5</sup>, Lin Xiao<sup>5</sup>, Khazhar Aktulaeva<sup>5</sup>, Philipp Roshchin<sup>5</sup>, Polina Bobkova<sup>5</sup>, Olalekan Lee Aiyegbusi<sup>5</sup>, Anbarasu Theodore Anbu<sup>6</sup>, Christian Apfelbacher<sup>7</sup>, Ali Akbar Asadi-Pooya<sup>8,9</sup>, Liat Ashkenazi-Hoffnung<sup>10</sup>, Caroline Brackel<sup>11,12</sup>, Danilo Buonsenso<sup>13,14</sup>, Wouter de Groot<sup>15</sup>, Janet V. Diaz<sup>16</sup>, Daniele Dona<sup>16</sup>, Audrey Dunn Galvin<sup>17</sup>, Jon Genuneit<sup>18</sup>, Helen Goss<sup>19</sup>, Sarah E. Hughes<sup>20</sup>, Christina J. Jones<sup>21</sup>, Krutika Kuppalli<sup>16</sup>, Laura A. Malone<sup>22,23</sup>, Sammie McFarland<sup>20</sup>, Dale M. Needham<sup>24,25,26</sup>, Nikita Nekliudov<sup>27</sup>, Timothy R. Nicholson<sup>28</sup>, Carlos R. Oliveira<sup>29,30,31</sup>, Nicoline Schiess<sup>32</sup>, Terry Y. Segal<sup>33</sup>, Louise Sigfrid<sup>34</sup>, Claire Thorne<sup>35</sup>, Susanne Vijverberg<sup>36</sup>, John O. Warner<sup>37</sup>, Wilson Milton Were<sup>16</sup>, Paula R. Williamson<sup>38</sup>, Daniel Munblit<sup>4,39,40,41</sup> and the PC-COS Children Study Group<sup>42</sup>

<sup>1</sup>Independent researcher, London, UK. <sup>2</sup>Department of Paediatrics and Paediatric Rheumatology, Sechenov First Moscow State Medical University (Sechenov University), Moscow, Russia. <sup>3</sup>National Medical Research Center for Children's Health, Moscow, Russia. <sup>4</sup>Department of Paediatrics and Paediatric Infectious Diseases, Institute of Child's Health, Sechenov First Moscow State Medical University (Sechenov University), Moscow, Russia. <sup>5</sup>University of Birmingham, Birmingham, UK. <sup>6</sup>Alder Hey Children's NHS Foundation Trust, Liverpool, UK. <sup>7</sup>University of Magdeburg, Magdeburg, Germany. <sup>8</sup>Epilepsy Research Center, Shiraz University of Medical Sciences, Shiraz, Iran. <sup>9</sup>Jefferson Comprehensive Epilepsy Center, Thomas Jefferson University, Philadelphia, PA, USA. <sup>10</sup>Schneider Children's Medical Center of Israel, Petah Tikva, Israel. <sup>11</sup>Department of Paediatric Pulmonology, Emma Children's Hospital, Amsterdam University Medical Centers, Amsterdam, The Netherlands. <sup>12</sup>Department of Pediatrics, Tergooi Hospital, Blaricum, The Netherlands. <sup>13</sup>Center for Global Health Research and Studies, Università Cattolica del Sacro Cuore, Rome, Italy. <sup>14</sup>Department of Woman and Child Health and Public Health, Fondazione Policlinico Universitario A. Gemelli IRCCS, Rome, Italy. <sup>15</sup>World Health Organization, Geneva, Switzerland. <sup>16</sup>Department for Women's and Children's Health, University of Padua, Padua, Italy. <sup>17</sup>University of Cork, Cork, Ireland. <sup>18</sup>Pediatric Epidemiology, Department of Pediatrics, Medical Faculty, Leipzig University, Leipzig, Germany. <sup>19</sup>Long Covid Kids Charity, Salisbury, UK. <sup>20</sup>Institute of Applied Health Research, University of Birmingham, Birmingham, UK. <sup>21</sup>School of Psychology, University of Surrey, Guildford, UK. <sup>22</sup>Kennedy Krieger Institute, Baltimore, MD, USA. <sup>23</sup>Departments of Neurology and Physical Medicine and Rehabilitation, Johns Hopkins University, Baltimore, MD, USA. <sup>24</sup>Outcomes After Critical Illness and Surgery (OACIS) Research Group, Johns Hopkins University, Baltimore, MD, USA. <sup>25</sup>Pulmonary and Critical Care Medicine, Department of Medicine, Johns Hopkins University School of Medicine, Baltimore, MD, USA. <sup>26</sup>Physical Medicine and Rehabilitation, Johns Hopkins University School of Medicine, Baltimore, MD, USA. <sup>27</sup>Institute for Health Metrics and Evaluation, University of Washington, Seattle, WA, USA. <sup>28</sup>Institute of Psychiatry, Psychology and Neuroscience, King's College London, London, UK. <sup>29</sup>Yale University School of Medicine, Department of Pediatrics, Section of Infectious Diseases, New Haven, CT, USA. <sup>30</sup>Yale University School of Public Health, Department of Biostatistics, Division of Health Informatics, New Haven, CT, USA. <sup>31</sup>Yale New Haven Children's Hospital, New Haven, CT, USA. <sup>32</sup>Brain Health Unit, Mental Health and Substance Use Department, World Health Organization, Geneva, Switzerland. <sup>33</sup>University College London Hospitals NHS Foundation Trust, London, UK. <sup>34</sup>ISARIC Global Support Centre, Centre for Tropical Medicine and Global Health, University of Oxford, Oxford, UK. <sup>35</sup>Population, Policy and Practice Research and Teaching Dept, University College London GOS Institute of Child Health, London, UK. <sup>36</sup>Amsterdam University Medical Centers, Amsterdam, The Netherlands. <sup>37</sup>Imperial College London, London, UK. <sup>38</sup>MRC-NIHR Trials Methodology Research Partnership, Department of Health Data Science, University of Liverpool, Liverpool, UK. <sup>39</sup>Division of Care in Long Term Conditions, Florence Nightingale Faculty of Nursing, Midwifery and Palliative Care, King's College London, London, UK. <sup>40</sup>Research and Clinical Center for Neuropsychiatry, Moscow, Russia. <sup>41</sup>Authors contributed equally to the study; apart from the two joint first authors, who contributed equally, the primary study team members and the last author, authors are listed in alphabetical order. <sup>42</sup>A full list of the PC-COS Children Study Group members and their affiliations can be found in the Acknowledgements section.

Corresponding author: Daniel Munblit ([daniel.munblit@kcl.ac.uk](mailto:daniel.munblit@kcl.ac.uk))

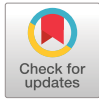

Shareable abstract (@ERSpublications)

**Agreed measurement instruments should be considered in future work and insights from this study should guide policymakers in creating initiatives that address the effects of long COVID on children and young people in healthcare and research environments** <https://bit.ly/3NdHLFB>

**Cite this article as:** Seylanova N, Chernyavskaya A, Degtyareva N, *et al.* Core outcome measurement set for research and clinical practice in post-COVID-19 condition (long COVID) in children and young people: an international Delphi consensus study “PC-COS Children”. *Eur Respir J* 2024; 63: 2301761 [DOI: 10.1183/13993003.01761-2023].

This extracted version can be shared freely online.

Copyright ©The authors 2024.  
This version is distributed under  
the terms of the Creative  
Commons Attribution Non-  
Commercial Licence 4.0. For  
commercial reproduction rights  
and permissions contact  
[permissions@ersnet.org](mailto:permissions@ersnet.org)

Received: 12 Oct 2023  
Accepted: 4 Dec 2023

## Abstract

The coronavirus disease 2019 (COVID-19) pandemic substantially impacted different age groups, with children and young people not exempted. Many have experienced enduring health consequences. Presently, there is no consensus on the health outcomes to assess in children and young people with post-COVID-19 condition. Furthermore, it is unclear which measurement instruments are appropriate for use in research and clinical management of children and young people with post-COVID-19. To address these unmet needs, we conducted a consensus study, aiming to develop a core outcome set (COS) and an associated core outcome measurement set (COMS) for evaluating post-COVID-19 condition in children and young people. Our methodology comprised of two phases. In phase 1 (to create a COS), we performed an extensive literature review and categorisation of outcomes, and prioritised those outcomes in a two-round online modified Delphi process followed by a consensus meeting. In phase 2 (to create the COMS), we performed another modified Delphi consensus process to evaluate measurement instruments for previously defined core outcomes from phase 1, followed by an online consensus workshop to finalise recommendations regarding the most appropriate instruments for each core outcome. In phase 1, 214 participants from 37 countries participated, with 154 (72%) contributing to both Delphi rounds. The subsequent online consensus meeting resulted in a final COS which encompassed seven critical outcomes: fatigue; post-exertion symptoms; work/occupational and study changes; as well as functional changes, symptoms, and conditions relating to cardiovascular, neuro-cognitive, gastrointestinal and physical outcomes. In phase 2, 11 international experts were involved in a modified Delphi process, selecting measurement instruments for a subsequent online consensus workshop where 30 voting participants discussed and independently scored the selected instruments. As a result of this consensus process, four instruments met *a priori* consensus criteria for inclusion: PedsQL multidimensional fatigue scale for “fatigue”; PedsQL gastrointestinal symptom scales for “gastrointestinal”; PedsQL cognitive functioning scale for “neurocognitive” and EQ-5D for “physical functioning”. Despite proposing outcome measurement instruments for the remaining three core outcomes (“cardiovascular”, “post-exertional malaise”, “work/occupational and study changes”), a consensus was not achieved. Our international, consensus-based initiative presents a robust framework for evaluating post-COVID-19 condition in children and young people in research and clinical practice *via* a rigorously defined COS and associated COMS. It will aid in the uniform measurement and reporting of relevant health outcomes worldwide.

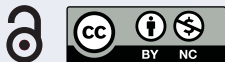

Supplement: ERJ-01761-2023.Shareable.pdf [file ERJ-01761-2023.Shareable.pdf]
