# Supplementary material for: Core outcome measurement set for research and clinical practice in post-COVID-19 condition (long COVID) in children and young people: an international Delphi consensus study “PC-COS Children”
Source: PubMed Central journal article supplement — Eur Respir J. 2024 Mar 14;63(3):2301761. doi: 10.1183/13993003.01761-2023 (PMC10938351; doi:10.1183/13993003.01761-2023), 2024-03-14
Supplement: ERJ-01761-2023.Appendix_1.pdf [file ERJ-01761-2023.Appendix_1.pdf]

# Appendix 1

## **Core Outcome Measurement Set for Research and Clinical Practice in Post COVID-19 Condition (Long COVID) in Children and Young People: An International Delphi Consensus Study ‘PC-COS Children’**

Nina Seylanova MD\*<sup>1</sup>, Anastasia Chernyavskaya MD\*<sup>2,3</sup>, Natalia Degtyareva BSc<sup>4</sup>, Aigun Mursalova MD<sup>4</sup>, Ali Ajam BSc<sup>4</sup>, Lin Xiao BSc<sup>4</sup>, Khazhar Aktulaeva BSc<sup>4</sup>, Philipp Roshchin BSc<sup>4</sup>, Polina Bobkova MD<sup>4</sup>, Olalekan Lee Aiyegbusi PhD<sup>5</sup>, Anbarasu Theodore Anbu MD<sup>6</sup>, Christian Apfelbacher PhD<sup>7</sup>, Ali Akbar Asadi-Pooya MD<sup>8,9</sup>, Liat Ashkenazi-Hoffnung MD<sup>10</sup>, Caroline Brackel MD<sup>11,12</sup>, Danilo Buonsenso MD, PhD<sup>13,14</sup>, Wouter de Groote<sup>15</sup>, Janet V. Diaz MD<sup>15</sup>, Daniele Dona MD, PhD<sup>16</sup>, Audrey Dunn Galvin PhD<sup>17</sup>, Jon Genuneit<sup>18</sup>, Helen Goss<sup>19</sup>, Sarah E. Hughes PhD<sup>20</sup>, Christina J Jones PhD<sup>21</sup>, Krutika Kuppalli MD<sup>15</sup>, Laura A. Malone MD, PhD<sup>22,23</sup>, Sammie McFarland<sup>19</sup>, Dale M. Needham, MD, PhD<sup>24,25,26</sup>, Nikita Nekliudov MD, MSc<sup>27</sup>, Timothy R Nicholson PhD<sup>28</sup>, Carlos R. Oliveira MD, PhD<sup>29,30,31</sup>, Nicoline Schiess<sup>32</sup>, Terry Y Segal MD<sup>33</sup>, Louise Sigfrid<sup>34</sup>, Claire Thorne PhD<sup>35</sup>, Susanne Vijverberg PhD<sup>36</sup>, John O. Warner<sup>37</sup>, Wilson Milton Were<sup>15</sup>, Paula R. Williamson PhD<sup>38</sup>, Daniel Munblit MD, PhD\*<sup>39,40,41</sup>, and the PC-COS Children Study Group\*\*

1 Independent researcher, London, UK

2 Department of Paediatrics and Paediatric Rheumatology, Sechenov First Moscow State Medical University (Sechenov University), Moscow, Russia

3 National Medical Research Center for Children's Health, Moscow, Russia

4 Sechenov First Moscow State Medical University (Sechenov University), Moscow, Russia

5 University of Birmingham, Birmingham, UK

6 Alder Hey Children's NHS Foundation Trust, Liverpool, UK

7 University of Magdeburg, Magdeburg, Germany

8 Epilepsy Research Center, Shiraz University of Medical Sciences, Shiraz, Iran

9 Jefferson Comprehensive Epilepsy Center, Thomas Jefferson University, Philadelphia, USA

10 Schneider Children's Medical Center of Israel, Petah Tikva, Israel

11 Amsterdam University Medical Centers, Amsterdam, the Netherlands

- 12 Department of Pediatrics, Tergooi Hospital, Blaricum, the Netherlands
- 13 Università Cattolica del Sacro Cuore, Rome, Italy
- 14 Department of Woman and Child Health and Public Health, Fondazione Policlinico Universitario A. Gemelli IRCCS, Rome, Italy
- 15 World Health Organization, Switzerland
- 16 Department for Women's and Children's Health, University of Padua, Padua, Italy
- 17 University of Cork, Cork, Ireland
- 18 Pediatric Epidemiology, Department of Pediatrics, Medical Faculty, Leipzig University, Leipzig, Germany
- 19 Long Covid Kids Charity, UK
- 20 Institute of Applied Health Research, University of Birmingham, Birmingham, UK
- 21 University of Surrey, Guildford, UK
- 22 Kennedy Krieger Institute, Baltimore, USA
- 23 Johns Hopkins University, Baltimore, USA
- 24 Outcomes After Critical Illness and Surgery (OACIS) Research Group, Johns Hopkins University, Baltimore, USA
- 25 Pulmonary and Critical Care Medicine, Department of Medicine, Johns Hopkins University School of Medicine, Baltimore, USA
- 26 Physical Medicine and Rehabilitation, Johns Hopkins University School of Medicine, Baltimore, USA
- 27 Institute for Health Metrics and Evaluation, University of Washington, Seattle, USA
- 28 King's College London, London, UK
- 29 Yale University School of Medicine, Department of Pediatrics, Section of Infectious Diseases, New Haven, USA
- 30 Yale University School of Public Health, Department of Biostatistics, Division of Health Informatics, New Haven, USA
- 31 Yale New Haven Children's Hospital, New Haven, USA
- 32 Brain Health Unit, Mental Health and Substance Use Department, World Health Organization, Switzerland

33 University College London Hospitals NHS Foundation Trust, London, UK

34 ISARIC Global Support Centre, Centre for Tropical Medicine and Global Health, University of Oxford, Oxford, UK

35 Population, Policy and Practice Research and Teaching Dept, University College London GOS Institute of Child Health, London, UK

36 Amsterdam University Medical Centers, Amsterdam, the Netherlands

37 Imperial College London, London, UK

38 Department of Health Data Science, University of Liverpool, Liverpool, UK

39 Division of Care in Long Term Conditions, Florence Nightingale Faculty of Nursing, Midwifery and Palliative Care, King's College London, London, UK

40 Department of Paediatrics and Paediatric Infectious Diseases, Institute of Child's Health, Sechenov First Moscow State Medical University (Sechenov University), Moscow, Russia

41 Research and Clinical Center for Neuropsychiatry, Moscow, Russia

\*Authors contributed equally to the study: apart from the two joint first authors, who contributed equally, the primary study team members and the last author, authors are listed in alphabetical order.

\*\* Listed at end of the manuscript

**Corresponding author:**

Daniel Munblit MD, PhD. Division of Care in Long Term Conditions, Florence Nightingale Faculty of Nursing, Midwifery and Palliative Care, King's College London, London, United Kingdom

Email: [daniel.munblit@kcl.ac.uk](mailto:daniel.munblit@kcl.ac.uk)

## **Table of Contents**

|                                                                                                      |            |
|------------------------------------------------------------------------------------------------------|------------|
| <b>1. SYSTEMATIC REVIEW SEARCH STRATEGY</b>                                                          | <b>4</b>   |
| <b>2. REFERENCES USED FOR THE DEVELOPMENT OF THE LONG LIST OF OUTCOMES.</b>                          | <b>10</b>  |
| <b>3. THE LONG LIST OF OUTCOMES USED IN POST-COVID-19 CONDITION STUDIES.</b>                         | <b>27</b>  |
| <b>4. THE LIST OF OUTCOMES PRESENTED TO THE DELPHI PARTICIPANTS.</b>                                 | <b>80</b>  |
| <b>5. FULL DETAILS OF DELPHI PARTICIPANTS.</b>                                                       | <b>83</b>  |
| <b>6. ATTRITION BETWEEN ROUNDS ONE AND TWO.</b>                                                      | <b>89</b>  |
| <b>7. RESULTS FOLLOWING TWO ROUNDS OF DELPHI AND SELECTION OF OUTCOMES FOR THE CONSENSUS MEETING</b> | <b>90</b>  |
| <b>8. DELPHI PROCESS AND CONSENSUS MEETING RESULTS</b>                                               | <b>95</b>  |
| <b>9. PC-COS CHILDREN PROJECT STEERING COMMITTEE GROUP AUTHORS</b>                                   | <b>106</b> |
| <b>10. PC-COS CHILDREN PROJECT STEERING COMMITTEE (TABLE)</b>                                        | <b>108</b> |

## 1. Systematic review search strategy

The COS consensus process was informed by a comprehensive search of Medline, Embase, and the WHO COVID-19 Research Database. The search was limited to English-language publications and protocols. Data from research protocols were extracted from two clinical trials registries, Clinical Trials.gov and the International Clinical Trials Registry Platform.

### 1.1 Medline search strategy

Database: Ovid MEDLINE(R) ALL

Search Strategy:

- 1 exp child/
- 2 exp infant/
- 3 exp adolescent/
- 4 exp pediatrics/
- 5 "toddler\*".ab,ti.
- 6 "paediatric\*".ab,ti.
- 7 "pediatric\*".ab,ti.
- 8 baby.ab,ti.
- 9 babies.ab,ti.
- 10 "neonate\*".ab,ti.
- 11 "newborn\*".ab,ti.
- 12 "new born\*".ab,ti.
- 13 "girl\*".ab,ti.

- 14 "boy\*".ab,ti.
- 15 (kindergarten\* or preschool\* or school\*).ab,ti.
- 16 "teen\*".ab,ti.
- 17 "youth\*".ab,ti.
- 18 "juvenile\*".ab,ti.
- 19 (young adj (person or people)).ab,ti.
- 20 "minors\*".ab,ti.
- 21 1 or 2 or 3 or 4 or 5 or 6 or 7 or 8 or 9 or 10 or 11 or 12 or 13 or 14 or 15 or 16 or 17 or 18 or 19 or 20
- 22 (chronic adj3 (covid\* or corona or coronavirus\*)).ab,ti.
- 23 (persist\* adj3 (covid\* or corona or coronavirus\*)).ab,ti.
- 24 (sustain\* adj3 (covid\* or corona or coronavirus\*)).ab,ti.
- 25 (history adj3 (covid\* or corona or coronavirus\*)).ab,ti.
- 26 ((postcovid\* or post covid\* or postcoronavirus\* or postcorona\* virus\* or post coronavirus\* or post corona\* virus\* or postcoronavirus\* or postcorono\* virus\* or post coronavirus\* or post corono\* virus\* or postcoronavirinae\* or postcorona\* virinae\* or post coronavirinae\* or post corona\* virinae\* or postCov or post Cov or postsars\* or post sars\* or "post severe acute respiratory syndrome\*" or postncov\* or post ncov\* or posthcov\* or post hcov\*) adj3 (syndrome\* or disorder\* or illness\* or sickness\* or disease\* or condition\* or symptom\* or sign\* or prognos\* or followup\* or "follow up\*" or feature\* or comorbid\* or "co morbid\*" or multimorbid\* or "multi morbid\*" or survivor\* or survival\* or risk\* or care\* or convalescen\* or recuperat\* or aftercare\* or ambulatory\* or outpatient\* or "out patient\*")).ab,ti.
- 27 ("long sars\*" or "post acute COVID\*" or "Covid\* syndrome" or "post-acute sequelae SARS-CoV-2 infection").ab,ti.
- 28 ((longhaul\* or long haul\* or long-haul\*) adj3 (covid\* or ncov\* or novel coronavirus or novel betacoronavirus or sars-ncov-2 or sars-cov-2)).ab,ti.
- 29 ((long term or long-term or longterm) adj3 effect\* adj3 (covid\* or ncov\* or novel coronavirus or novel betacoronavirus or sars-ncov-2 or sars-cov-2)).ab,ti.
- 30 (sequela\* adj3 (covid\* or ncov\* or novel coronavirus or novel betacoronavirus or sars-ncov-2 or sars-cov-2)).ab,ti.

- 31 (persistent symptoms or persistant symptoms or persisting symptoms or longlasting symptoms or long lasting symptoms or long term symptoms or long-term symptoms or longterm symptoms).mp. and (Betacoronavirus\* or Corona Virus\* or Coronavirus\* or Coronovirus\* or CoV or CoV2 or COVID or COVID19 or COVID-19 or HCoV-19 or nCoV or SARS CoV 2 or SARS2 or SARSCoV or SARS-CoV or SARS-CoV-2 or 2019nCoV).ab,ti.
- 32 (long\* adj3 (covid\* or ncov\* or novel coronavirus or novel betacoronavirus or sars-ncov-2 or sars-cov-2)).ab,ti.
- 33 ((post acute or post-acute or postacute) adj3 (covid\* or ncov\* or novel coronavirus or novel betacoronavirus or sars-ncov-2 or sars-cov-2)).ab,ti.
- 34 22 or 23 or 24 or 25 or 26 or 27 or 28 or 29 or 30 or 31 or 32 or 33
- 35 21 and 34

## 1.2 Embase search strategy

Database: Embase Classic+Embase

Search Strategy:

- 1 exp child/
- 2 exp infant/
- 3 exp adolescent/
- 4 exp pediatrics/
- 5 "toddler\*".ab,ti.
- 6 "paediatric\*".ab,ti.
- 7 "pediatric\*".ab,ti.
- 8 baby.ab,ti.
- 9 babies.ab,ti.
- 10 "neonate\*".ab,ti.

- 11 "newborn\*".ab,ti.
- 12 "new born\*".ab,ti.
- 13 "girl\*".ab,ti.
- 14 "boy\*".ab,ti.
- 15 (kindergarten\* or preschool\* or school\*).ab,ti.
- 16 "teen\*".ab,ti.
- 17 "youth\*".ab,ti.
- 18 "juvenile\*".ab,ti.
- 19 (young adj (person or people)).ab,ti.
- 20 "minors\*".ab,ti.
- 21 1 or 2 or 3 or 4 or 5 or 6 or 7 or 8 or 9 or 10 or 11 or 12 or 13 or 14 or 15 or 16 or 17 or 18 or 19 or 20
- 22 (chronic adj3 (covid\* or corona or coronavirus\*)).ab,ti.
- 23 (persist\* adj3 (covid\* or corona or coronavirus\*)).ab,ti.
- 24 (sustain\* adj3 (covid\* or corona or coronavirus\*)).ab,ti.
- 25 (history adj3 (covid\* or corona or coronavirus\*)).ab,ti.
- 26 ((postcovid\* or post covid\* or postcoronavirus\* or postcorona\* virus\* or post coronavirus\* or post corona\* virus\* or postcoronavirus\* or postcorono\* virus\* or post coronovirus\* or post corono\* virus\* or postcoronavirinae\* or postcorona\* virinae\* or post coronavirinae\* or post corona\* virinae\* or postCov or post Cov or postsars\* or post sars\* or "post severe acute respiratory syndrome\*" or postncov\* or post ncov\* or posthcov\* or post hcov\*) adj3 (syndrome\* or disorder\* or illness\* or sickness\* or disease\* or condition\* or symptom\* or sign\* or prognos\* or followup\* or "follow up\*" or feature\* or comorbid\* or "co morbid\*" or multimorbid\* or "multi morbid\*" or survivor\* or survival\* or risk\* or care\* or convalescen\* or recuperat\* or aftercare\* or ambulatory\* or outpatient\* or "out patient\*")).ab,ti.
- 27 ("long sars\*" or "post acute COVID\*" or "Covid\* syndrome" or "post-acute sequelae SARS-CoV-2 infection").ab,ti.
- 28 ((longhaul\* or long haul\* or long-haul\*) adj3 (covid\* or ncov\* or novel coronavirus or novel betacoronavirus or sars-ncov-2 or sars-cov-2)).ab,ti.



- 29 ((long term or long-term or longterm) adj3 effect\* adj3 (covid\* or ncov\* or novel coronavirus or novel betacoronavirus or sars-ncov-2 or sars-cov-2)).ab,ti.
- 30 (sequela\* adj3 (covid\* or ncov\* or novel coronavirus or novel betacoronavirus or sars-ncov-2 or sars-cov-2)).ab,ti.
- 31 (persistent symptoms or persistant symptoms or persisting symptoms or longlasting symptoms or long lasting symptoms or long term symptoms or long-term symptoms or longterm symptoms).mp. and (Betacoronavirus\* or Corona Virus\* or Coronavirus\* or Coronavirus\* or CoV or CoV2 or COVID or COVID19 or COVID-19 or HCoV-19 or nCoV or SARS CoV 2 or SARS2 or SARSCoV or SARS-CoV or SARS-CoV-2 or 2019nCoV).ab,ti.
- 32 (long\* adj3 (covid\* or ncov\* or novel coronavirus or novel betacoronavirus or sars-ncov-2 or sars-cov-2)).ab,ti.
- 33 ((post acute or post-acute or postacute) adj3 (covid\* or ncov\* or novel coronavirus or novel betacoronavirus or sars-ncov-2 or sars-cov-2)).ab,ti.
- 34 exp long COVID/
- 35 22 or 23 or 24 or 25 or 26 or 27 or 28 or 29 or 30 or 31 or 32 or 33 or 34
- 36 21 and 35

### 1.3 The WHO COVID-19 Research Database search strategy

(tw:("long covid"~3 OR "long-covid" OR "long covid" OR "post-covid"~3 OR "post covid" OR "post-covid" OR "long term" OR "post acute" OR "post-acute" OR "chronic covid"~3 OR "post discharge" OR postdischarge\* OR "post-discharge" OR "after hospital" OR "persistent symptom" OR "persistent symptoms" OR "after hospitalisation" OR "after hospitalization" OR "after sars" OR "after covid" OR "long haul" OR "persistant effects" OR "persistent effects" OR "prolonged symptoms" OR "prolonged symptom" )) AND (tw:(mh:("Child" OR "Maternal-Child Health Centers" OR "Child Nutrition Sciences" OR "Child Health Services" OR "Child Nutritional Physiological Phenomena" OR "Child Nutrition Disorders" OR "Child Mortality" OR "Child Welfare" OR "Child Care" OR "Child Reactive Disorders" OR "Child Guidance" OR "Child Reactive Disorders" OR "Child Behavior Disorders" OR "Child, Orphaned" OR "Child, Institutionalized" OR "Child, Hospitalized" OR "Child Development" OR "Child Behavior" OR "Developmental Disabilities" OR "Mental Disorders Diagnosed in Childhood" OR "Disabled Children" OR "Pediatric Nursing"OR "Pediatric Nursing" OR "Pediatric Assistants" OR "Hospitals, Pediatric" OR "Intensive Care Units, Pediatric" OR "Pediatrics" OR "Pediatricians") OR child OR children OR newborn\* OR childhood OR baby OR babies OR toddler OR toddlers OR infants OR infant OR infantile OR "young patient" OR "young patients" OR "young people" OR "paediatricians" OR "Pediatrician" OR "paediatrician" OR "Pediatrics" OR "paediatrics" OR Pediatric OR paediatric ))

## 2. References used for the development of the long list of outcomes.

| 1. References from initial systematic review |                                                                                                                                                                                                                                                                                                             |
|----------------------------------------------|-------------------------------------------------------------------------------------------------------------------------------------------------------------------------------------------------------------------------------------------------------------------------------------------------------------|
| 1a. Original studies                         |                                                                                                                                                                                                                                                                                                             |
| Document type                                | Study title                                                                                                                                                                                                                                                                                                 |
| 1                                            | Preprint<br>Dumont R, Nehme M, Lorthe E, et al. Persistent symptoms among children and adolescents with and without anti-SARS-CoV-2 antibodies: a population-based serological study in Geneva, Switzerland. medRxiv. Published online January 1, 2021:2021.12.23.21268298. doi:10.1101/2021.12.23.21268298 |
| 2                                            | Preprint<br>Miller F, Nguyen V, Navaratnam AMD, et al. Prevalence of persistent symptoms in children during the COVID-19 pandemic: evidence from a household cohort study in England and Wales. medRxiv. Published online January 1, 2021:2021.05.28.21257602. doi:10.1101/2021.05.28.21257602              |
| 3                                            | Preprint<br>Roessler M, Tesch F, Batram M, et al. Post COVID-19 in children, adolescents, and adults: results of a matched cohort study including more than 150,000 individuals with COVID-19. medRxiv. Published online January 1, 2021:2021.10.21.21265133. doi:10.1101/2021.10.21.21265133               |
| 4                                            | Preprint<br>Knoke L, Schlegtendal A, Maier C, Eitner L, Lücke T, Brinkmann F. More complaints than findings - Long-term pulmonary function in children and adolescents after COVID-19. medRxiv. Published online January 1, 2021:2021.06.22.21259273. doi:10.1101/2021.06.22.21259273                       |
| 5                                            | Preprint<br>Sante G Di, Buonsenso D, Rose C De, et al. Immune profile of children with post-acute sequelae of SARS-CoV-2 infection (Long Covid). medRxiv. Published online 2021. doi: 10.1101/2021.05.07.21256539                                                                                           |
| 6                                            | Preprint<br>Larsen VB, Størdal K, Telle K, Methi F, Magnusson K. A comparison of health care use after severe COVID-19, respiratory syncytial virus, and influenza in children. medRxiv. Published online January 1, 2021:2021.11.22.21266522. doi:10.1101/2021.11.22.21266522                              |
| 7                                            | Preprint<br>Heiss R, Wagner A, Tan L, et al. Persisting pulmonary dysfunction in pediatric post-acute Covid-19. medRxiv. Published online January 1, 2022:2022.02.21.22270909. doi:10.1101/2022.02.21.22270909                                                                                              |
| 8                                            | Article<br>Asadi-Pooya AA, Nemati H, Shahisavandi M, et al. Long COVID in children and adolescents [published correction                                                                                                                                                                                    |

|           |         |                                                                                                                                                                                                                                                                                                                                                                                           |
|-----------|---------|-------------------------------------------------------------------------------------------------------------------------------------------------------------------------------------------------------------------------------------------------------------------------------------------------------------------------------------------------------------------------------------------|
|           |         | appears in World J Pediatr. 2022 Jul 3;:]. World J Pediatr. 2021;17(5):495-499. doi:10.1007/s12519-021-00457-6                                                                                                                                                                                                                                                                            |
| <b>9</b>  | Article | Zavala M, Ireland G, Amin-Chowdhury Z, Ramsay ME, Ladhani SN. Acute and Persistent Symptoms in Children With Polymerase Chain Reaction (PCR)-Confirmed Severe Acute Respiratory Syndrome Coronavirus 2 (SARS-CoV-2) Infection Compared With Test-Negative Children in England: Active, Prospective, National Surveillance. Clin Infect Dis. 2022;75(1):e191-e200. doi:10.1093/cid/ciab991 |
| <b>10</b> | Article | Ashkenazi-Hoffnung L, Shmueli E, Ehrlich S, et al. Long COVID in Children: Observations From a Designated Pediatric Clinic. Pediatr Infect Dis J. 2021;40(12):e509-e511. doi:10.1097/INF.0000000000003285                                                                                                                                                                                 |
| <b>11</b> | Article | María Bergia, Elena Sanchez-Marcos, Blanca Gonzalez-Haba et al. Study of Prevalence and Characteristics of Long Covid in Spanish Children, 14 December 2021, PREPRINT (Version 1) available at Research Square [https://doi.org/10.21203/rs.3.rs-1068678/v1]                                                                                                                              |
| <b>12</b> | Article | Cara J Bossley, Ema Kavaliunaite, Katharine Harman et al. Post-Acute COVID-19 Outcomes In Children Requiring Hospitalisation, 12 November 2021, PREPRINT (Version 1) available at Research Square [https://doi.org/10.21203/rs.3.rs-1001103/v1]                                                                                                                                           |
| <b>13</b> | Article | Brackel CLH, Lap CR, Buddingh EP, et al. Pediatric long-COVID: An overlooked phenomenon?. Pediatr Pulmonol. 2021;56(8):2495-2502. doi:10.1002/ppul.25521                                                                                                                                                                                                                                  |
| <b>14</b> | Article | Buonsenso D, Munblit D, De Rose C, et al. Preliminary evidence on long COVID in children. Acta Paediatr. 2021;110(7):2208-2211. doi:10.1111/apa.15870                                                                                                                                                                                                                                     |
| <b>15</b> | Article | Roge I, Smane L, Kivite-Urtane A, et al. Comparison of Persistent Symptoms After COVID-19 and Other Non-SARS-CoV-2 Infections in Children. Front Pediatr. 2021;9:752385. Published 2021 Oct 29. doi:10.3389/fped.2021.752385                                                                                                                                                              |
| <b>16</b> | Article | Radtke T, Ulyte A, Puhan MA, Kriemler S. Long-term Symptoms After SARS-CoV-2 Infection in Children and Adolescents [published online ahead of print, 2021 Jul 15]. JAMA. 2021;326(9):869-871. doi:10.1001/jama.2021.11880                                                                                                                                                                 |
| <b>17</b> | Article | Osmanov IM, Spiridonova E, Bobkova P, et al. Risk factors for post-COVID-19 condition in previously hospitalised children using the ISARIC Global follow-up protocol: a prospective cohort study. Eur Respir J. 2022;59(2):2101341. Published 2022 Feb 3. doi:10.1183/13993003.01341-2021                                                                                                 |
| <b>18</b> | Article | Molteni E, Sudre CH, Canas LS, et al. Illness duration and symptom profile in symptomatic UK school-aged children tested for SARS-CoV-2 [published correction appears in Lancet Child Adolesc Health. 2021 Aug 31;:]. Lancet Child Adolesc Health. 2021;5(10):708-718. doi:10.1016/S2352-4642(21)00198-X                                                                                  |

|           |         |                                                                                                                                                                                                                                                                                                                                                                                                 |
|-----------|---------|-------------------------------------------------------------------------------------------------------------------------------------------------------------------------------------------------------------------------------------------------------------------------------------------------------------------------------------------------------------------------------------------------|
| <b>19</b> | Article | Erol N, Alpinar A, Erol C, Sari E, Alkan K. Intriguing new faces of Covid-19: persisting clinical symptoms and cardiac effects in children. <i>Cardiol Young</i> . 2022;32(7):1085-1091. doi:10.1017/S1047951121003693                                                                                                                                                                          |
| <b>20</b> | Article | Fink TT, Marques HHS, Gualano B, et al. Persistent symptoms and decreased health-related quality of life after symptomatic pediatric COVID-19: A prospective study in a Latin American tertiary hospital [published correction appears in <i>Clinics (Sao Paulo)</i> . 2022 Mar 3;77:100024]. <i>Clinics (Sao Paulo)</i> . 2021;76:e3511. Published 2021 Nov 26. doi:10.6061/clinics/2021/e3511 |
| <b>21</b> | Article | Lars Christian Lund, Jesper Hallas, Henrik Nielsen et al. Post-acute effects of SARS-CoV-2 infection in individuals not requiring hospital admission: a Danish population-based cohort study. <i>Lancet Infect Dis</i> 2021; 21: 1373–82. Published Online May 10, 2021. doi: 10.1016/S1473-3099(21)00211-5                                                                                     |
| <b>22</b> | Article | Leftin Dobkin SC, Collaco JM, McGrath-Morrow SA. Protracted respiratory findings in children post-SARS-CoV-2 infection. <i>Pediatr Pulmonol</i> . 2021;56(12):3682-3687. doi:10.1002/ppul.25671                                                                                                                                                                                                 |
| <b>23</b> | Article | Guemes-Villahoz N, Burgos-Blasco B, Perez-Garcia P, et al. Retinal and peripapillary vessel density increase in recovered COVID-19 children by optical coherence tomography angiography. <i>J AAPOS</i> . 2021;25(6):325.e1-325.e6. doi:10.1016/j.jaapos.2021.06.004                                                                                                                            |
| <b>24</b> | Article | Clavenna A, Francesco CD, Maio LD, et al. Risk of Sequelae of COVID-19 in Children Cared for by Primary Care Pediatricians. <i>Indian Pediatr</i> . 2022;59(1):87-88. doi:10.1007/s13312-022-2427-3                                                                                                                                                                                             |
| <b>25</b> | Article | Matteudi T, Luciani L, Fabre A, et al. Clinical characteristics of paediatric COVID-19 patients followed for up to 13 months. <i>Acta Paediatr</i> . 2021;110(12):3331-3333. doi:10.1111/apa.16071                                                                                                                                                                                              |
| <b>26</b> | Article | Say D, Crawford N, McNab S, Wurzel D, Steer A, Tosif S. Post-acute COVID-19 outcomes in children with mild and asymptomatic disease. <i>Lancet Child Adolesc Health</i> . 2021;5(6):e22-e23. doi:10.1016/S2352-4642(21)00124-3                                                                                                                                                                  |
| <b>27</b> | Article | Smane L, Stars I, Pucuka Z, Roge I, Pavare J. Persistent clinical features in paediatric patients after SARS-CoV-2 virological recovery: a retrospective population-based cohort study from a single centre in Latvia. <i>BMJ Paediatr Open</i> . 2020;4(1):e000905. Published 2020 Dec 29. doi:10.1136/bmjpo-2020-000905                                                                       |
| <b>28</b> | Article | Zhang J, Xu J, Zhou S, et al. The characteristics of 527 discharged COVID-19 patients undergoing long-term follow-up in China. <i>Int J Infect Dis</i> . 2021;104:685-692. doi:10.1016/j.ijid.2021.01.064                                                                                                                                                                                       |
| <b>29</b> | Article | Petersen MS, Kristiansen MF, Hanusson KD, et al. Long COVID in the Faroe Islands: A Longitudinal Study Among Nonhospitalized Patients. <i>Clin Infect Dis</i> . 2021;73(11):e4058-e4063. doi:10.1093/cid/ciaa1792                                                                                                                                                                               |
| <b>30</b> | Article | Borch L, Holm M, Knudsen M, Ellermann-Eriksen S, Hagstroem S. Long COVID symptoms and duration in SARS-CoV-2 positive children - a nationwide cohort study. <i>Eur J Pediatr</i> . 2022;181(4):1597-1607. doi:10.1007/s00431-021-                                                                                                                                                               |

|                                      |         |                                                                                                                                                                                                                                                                                                                                                |
|--------------------------------------|---------|------------------------------------------------------------------------------------------------------------------------------------------------------------------------------------------------------------------------------------------------------------------------------------------------------------------------------------------------|
|                                      |         | 04345-z                                                                                                                                                                                                                                                                                                                                        |
| 31                                   | Article | Stephenson T, Pinto Pereira SM, Shafran R, et al. Physical and mental health 3 months after SARS-CoV-2 infection (long COVID) among adolescents in England (CLOcK): a national matched cohort study. <i>Lancet Child Adolesc Health</i> . 2022;6(4):230-239. doi:10.1016/S2352-4642(22)00022-0                                                 |
| 32                                   | Article | Karolina Dolezalova, Jana Tukova, Petr Pohunek. Respiratory Consequences of Pediatric Post-COVID Syndrome: Case Series. <i>Authorea</i> . October 28, 2021. DOI: 10.22541/au.163544403.31818690/v1                                                                                                                                             |
| 33                                   | Article | Sterky E, Olsson-Åkefeldt S, Hertting O, et al. Persistent symptoms in Swedish children after hospitalisation due to COVID-19. <i>Acta Paediatr</i> . 2021;110(9):2578-2580. doi:10.1111/apa.15999                                                                                                                                             |
| 34                                   | Article | Smame L, Roge I, Pucuka Z, Pavare J. Clinical features of pediatric post-acute COVID-19: a descriptive retrospective follow-up study. <i>Ital J Pediatr</i> . 2021;47(1):177. Published 2021 Aug 26. doi:10.1186/s13052-021-01127-z                                                                                                            |
| 35                                   | Article | Khodeir MM, Shabana HA, Rasheed Z, et al. COVID-19: Post-recovery long-term symptoms among patients in Saudi Arabia. <i>PLoS One</i> . 2021;16(12):e0260259. Published 2021 Dec 8. doi:10.1371/journal.pone.0260259                                                                                                                            |
| 36                                   | Article | Denina M, Pruccoli G, Scolfaro C, et al. Sequelae of COVID-19 in Hospitalized Children: A 4-Months Follow-Up. <i>Pediatr Infect Dis J</i> . 2020;39(12):e458-e459. doi:10.1097/INF.0000000000002937                                                                                                                                            |
| 37                                   | Article | Chapagain RH, Adhikari S, Pokharel S, Shrestha SM, Bichha RP. Presenting Clinico-laboratory Characteristics, Hospital Course and Outcomes of Admitted Children with COVID19 in a Tertiary Pediatric Hospital of Nepal. <i>J Nepal Health Res Counc</i> . 2021;19(2):349-354. Published 2021 Sep 6. doi:10.33314/jnhrc.v19i2.3569               |
| 38                                   | Article | Smith MP. Estimating total morbidity burden of COVID-19: relative importance of death and disability. <i>J Clin Epidemiol</i> . 2022;142:54-59. doi:10.1016/j.jclinepi.2021.10.018                                                                                                                                                             |
| 39                                   | Article | Parisi GF, Diaferio L, Brindisi G, et al. Cross-Sectional Survey on Long Term Sequelae of Pediatric COVID-19 among Italian Pediatricians. <i>Children (Basel)</i> . 2021;8(9):769. Published 2021 Aug 31. doi:10.3390/children8090769                                                                                                          |
| 40                                   | Article | Hernandez-Romieu AC, Carton TW, Saydah S, et al. Prevalence of Select New Symptoms and Conditions Among Persons Aged Younger Than 20 Years and 20 Years or Older at 31 to 150 Days After Testing Positive or Negative for SARS-CoV-2. <i>JAMA Netw Open</i> . 2022;5(2):e2147053. Published 2022 Feb 1. doi:10.1001/jamanetworkopen.2021.47053 |
| <b>1b. Clinical trials protocols</b> |         |                                                                                                                                                                                                                                                                                                                                                |

|           | <b>Trial ID</b>     | <b>Study title</b>                                                                                                                                                                |
|-----------|---------------------|-----------------------------------------------------------------------------------------------------------------------------------------------------------------------------------|
| <b>1</b>  | ChiCTR2000038134    | Half-year follow-up of novel coronavirus pneumonia (COVID-19) rehabilitated patients in Chongqing Municipality                                                                    |
| <b>2</b>  | ChiCTR2000033980    | A follow-up study of novel coronavirus pneumonia (COVID-19) patients in Wanzhou District, Chongqing                                                                               |
| <b>3</b>  | ChiCTR2100043802    | Follow up study on health status of rehabilitation patients with novel coronavirus pneumonia (COVID-19)                                                                           |
| <b>4</b>  | CTRI/2020/11/029026 | Assessment of long term respiratory sequelae in children who had infection with COVID 19 virus.                                                                                   |
| <b>5</b>  | CTRI/2021/01/030235 | Lung Function Indices Measured by Forced Oscillation Test in Post Covid patients: An Observational Study.                                                                         |
| <b>6</b>  | ISRCTN34804192      | Study of children and young people who may be experiencing long COVID                                                                                                             |
| <b>7</b>  | NCT05172011         | Understanding the Long-term Impact of COVID on Children and Families                                                                                                              |
| <b>8</b>  | CTRI/2020/07/026821 | Study of dermatological changes post COVID-19 illness within 3 months of recovery.                                                                                                |
| <b>9</b>  | NCT04479293         | Post COVID-19 Functional Status in Egypt                                                                                                                                          |
| <b>10</b> | NCT04799444         | LATE-COVID/LATE-COVID-Kids - Observational Study in Children and Adults (LATE-COVID)                                                                                              |
| <b>11</b> | ACTRN12620000527965 | Neonatal CoVID-19 Study to evaluate the population health impacts of COVID-19 in mothers and their newborn infants cared for in tertiary and non-tertiary hospitals in Australia. |
| <b>12</b> | NL8926              | Clinical features of COVID-19 in Pediatric Patients, long term effects                                                                                                            |
| <b>13</b> | ChiCTR2000032895    | Epidemiological, clinical and prognosticated features of novel coronavirus pneumonia (COVID-19) in Zhuhai                                                                         |
| <b>14</b> | ChiCTR2000030849    | Investigation on psychological status of novel coronavirus pneumonia (COVID-19) rehabilitation patients in Zhengzhou City and research on coping strategies                       |
| <b>15</b> | CTRI/2020/06/025588 | Clinical profile and outcomes of patients with Corona virus disease 19 (COVID – 19) admitted to a tertiary care hospital in Mumbai.                                               |
| <b>16</b> | DRKS00024835        | "LONG-COVID-19" also in pediatric patients. A pilot study asking if a comprehensive aftercare is necessary for children and young adults after a SARS-CoV-2 infection             |
| <b>17</b> | NCT04741412         | Pediatric SARS-CoV-2 Infections: Course of COVID-19, Immune Responses, Complications and Long-term                                                                                |

|           |                                                                                                                                                    |
|-----------|----------------------------------------------------------------------------------------------------------------------------------------------------|
|           | Consequences (PEDCOVID-19)                                                                                                                         |
| <b>18</b> | NCT05097677<br>Follow-up of Covid-19 Long Term Sequelae                                                                                            |
| <b>19</b> | NCT04335773<br>COVID-19 in Hospitalised Norwegian Children - Risk Factors, Outcomes and Immunology                                                 |
| <b>20</b> | NCT04588363<br>COVID-19: Pediatric Research Immune Network on SARS-CoV-2 and MIS-C (PRISM)                                                         |
| <b>21</b> | ChiCTR2100048440<br>Study on the correlation between multi-omics parameters and clinical features, severity and prognosis of COVID-19 patients     |
| <b>22</b> | ChiCTR2000038943<br>Outcomes of and Prognosis Factors for COVID-19 Patients: an Observational Study                                                |
| <b>23</b> | CTRI/2020/05/025221<br>Create registry of Childhood Cancer patients in India with COVID 19 to provide guidelines for prevention and treatment      |
| <b>24</b> | CTRI/2020/11/029058<br>Cross sectional study to assess the impact of COVID 19 infection on pulmonary function tests in children                    |
| <b>25</b> | NCT04270383<br>Clinical Characteristics and Long-term Prognosis of 2019-nCoV Infection in Children                                                 |
| <b>26</b> | NCT04342702<br>A Study on the Prospective Cohort Library of COVID-19 in Southern                                                                   |
| <b>27</b> | NCT04359914<br>Neurocognitive Impairment in Patients With COVID-19 (NCoV)                                                                          |
| <b>28</b> | NCT04379089<br>Neurologic Manifestations of COVID 19 in Children                                                                                   |
| <b>29</b> | NCT04388436<br>Post Covid-19 Cardiopulmonary and Immunological Changes (covid-19)                                                                  |
| <b>30</b> | NCT04448145<br>Determinants of SARS-COV2 (COVID-19) Persistence After Convalescence (C-PIC)                                                        |
| <b>31</b> | NCT04448717<br>COVID-19: Longitudinal Study of Seroprevalence of SARS-CoV-2 Antibodies and Development of Immunity in School Children (CiaoCorona) |
| <b>32</b> | NCT04449978<br>TARGeT Kids! COVID-19 Study of Children and Families                                                                                |
| <b>33</b> | NCT04632719<br>The MentalPlus® for Assessment and Rehabilitation of Cognitive Function After Remission of the Symptoms of COVID-19 (MP-COVID)      |
| <b>34</b> | NCT04659486<br>Adolescents With COVID-19/MIS-C at HCFMUSP                                                                                          |

|                       |                        |                                                                                                                                                                 |
|-----------------------|------------------------|-----------------------------------------------------------------------------------------------------------------------------------------------------------------|
| <b>35</b>             | NCT04686734            | Long-term Effects of COVID-19 in Adolescents (LoTECA)                                                                                                           |
| <b>36</b>             | NCT04786353            | Long COVID Kids DK - Investigating Long-term Covid-19                                                                                                           |
| <b>37</b>             | NCT04830852            | Pediatric COVID Outcomes Study (PECOS)                                                                                                                          |
| <b>38</b>             | NCT05059080            | A Six-Month Follow-Up Study of Participants With Coronavirus Disease 2019 (COVID-19) Previously Enrolled in a RO7496998 (AT-527) Study (MEADOWSPRING)           |
| <b>39</b>             | NCT05074953            | Post-COVID-19 Monitoring in Routine Health Insurance Data (POINTED)                                                                                             |
| <b>40</b>             | NCT04346212            | Oropharyngeal Dysphagia in Patients With COVID-19                                                                                                               |
| <b>41</b>             | NCT04410107            | Lung Function, Exercise Capacity and Health-Related Quality of Life After Severe COVID-19                                                                       |
| <b>42</b>             | NCT04457505            | One Year Follow-ups of Patients Admitted to Spanish Intensive Care Units Due to COVID-19                                                                        |
| <b>43</b>             | NCT04523051            | Rehabilitation After Admission in Intensive Care Unit for COVID-19 (RECOVER)                                                                                    |
| <b>44</b>             | NCT04702945            | Canadian COVID-19 Emergency Department Registry (CCEDRRN)                                                                                                       |
| <b>45</b>             | NCT04724850            | Evolution of Coronavirus Disease 2019 (COVID-19) Patients in Extremadura (COVIXTREM)                                                                            |
| <b>46</b>             | NCT04764773            | Persistence of Symptoms After Improvement of Acute COVID-19 (COVID-19)                                                                                          |
| <b>47</b>             | NCT04846010            | Recovering Damaged Cells for Sequelae Caused by COVID-19, SARS-CoV-2 (sequelae)                                                                                 |
| <b>48</b>             | NCT04900961            | CISCO-21 Prevent and Treat Long COVID-19. (CISCO-21)                                                                                                            |
| <b>49</b>             | NCT05004246            | Longitudinal Changes in Characteristics of COVID-19 Survivors and Their Long-term Follow-up Study                                                               |
| <b>50</b>             | NCT05130736            | Rehabilitation Robot in Patients With Post-Coronavirus Disease (COVID-19) Fatigue Syndrome                                                                      |
| <b>1c. Additional</b> |                        |                                                                                                                                                                 |
|                       | <b>Document type</b>   | <b>Title</b>                                                                                                                                                    |
| <b>1</b>              | Case report form (CRF) | ISARIC COVID-19 & other acute respiratory infections Initial Follow Up Survey for children and young people (less than 18 years of age) v.1.3 (18 October 2021) |



## 2. References from additional systematic review

### 2a. Original studies

|   | Document type | Study title                                                                                                                                                                                                                                                                                                                                                                                                                                                                                                                                                                                    |
|---|---------------|------------------------------------------------------------------------------------------------------------------------------------------------------------------------------------------------------------------------------------------------------------------------------------------------------------------------------------------------------------------------------------------------------------------------------------------------------------------------------------------------------------------------------------------------------------------------------------------------|
| 1 | Preprint      | Britton, P. N., Burrell, R., Chapman, E., Boyle, J., Alexander, S., Belessis, Y., Dalby-Payne, J., Knight, K., Lau, C., McMullan, B., Milne, B., Paull, M., Nguyen, J., Selvadurai, H., Dale, R., & Baillie, A. (2023). Post COVID-19 conditions in Children and Adolescents at 3 months following a Delta outbreak in Australia: a cohort study. MedRxiv, 2023.03.14.23287239. <a href="https://doi.org/10.1101/2023.03.14.23287239">doi.org/10.1101/2023.03.14.23287239</a>                                                                                                                  |
| 2 | Preprint      | Sharanya, P., Mishra, D., Agarwal, A., & Keerthana, D. (2023). Pulmonary sequelae at six months in children with SARS-CoV-2 infection: <em>A Single-Centre Study</em>. MedRxiv, 2023.03.10.23286644. <a href="https://doi.org/10.1101/2023.03.10.23286644">doi.org/10.1101/2023.03.10.23286644</a>                                                                                                                                                                                                                                                                                             |
| 3 | Preprint      | Zhang, Y., Romieu-Hernandez, A., Boehmer, T. K., Azziz-Baumgartner, E., Carton, T. W., Gundlapalli, A. v, Fearington, J., Nagavedu, K., Dea, K., Moyneur, E., Cowell, L. G., Kaushal, R., Mayer, K. H., Puro, J., Rasmussen, S. A., Thacker, D., Weiner, M. G., Saydeh, S., Block, J. P., & Partners, Pcor. N. (2022). Association between SARS-CoV-2 Infection and Select Symptoms and Conditions 31 to 150 Days After Testing among Children and Adults. MedRxiv, 2022.12.18.22283646. <a href="https://doi.org/10.1101/2022.12.18.22283646">https://doi.org/10.1101/2022.12.18.22283646</a> |
| 4 | Preprint      | Dumont R, Richard V, Lorthe E, et al. A population-based serological study of post-COVID syndrome prevalence and risk factors in children and adolescents. Nat Commun. 2022;13(1):7086. Published 2022 Nov 29. doi:10.1038/s41467-022-34616-8                                                                                                                                                                                                                                                                                                                                                  |
| 5 | Preprint      | Pajor, N. M., Lorman, V., Razzaghi, H., Case, A., Prahalad, P., Brill, S. B., Wu, Q., Chen, Y., Block, J., Patel, P. B., Rao, S., Mejias, A., Thacker, D., Jhaveri, R., Bailey, L. C., Forrest, C. B., & Lee, G. M. (2022). Healthcare utilization following SARS-CoV-2 infection in children and adolescents with chronic conditions: An EHR-based Cohort Study from the RECOVER Program. MedRxiv, 2022.07.08.22276768. <a href="https://doi.org/10.1101/2022.07.08.22276768">https://doi.org/10.1101/2022.07.08.22276768</a>                                                                 |
| 6 | Preprint      | Kendall, E. K., Olaker, V. R., Kaelber, D. C., Xu, R., & Davis, P. B. (2022). Elevated liver enzymes and bilirubin following SARS-CoV-2 infection in children under 10. MedRxiv, 2022.05.10.22274866. <a href="https://doi.org/10.1101/2022.05.10.22274866">doi.org/10.1101/2022.05.10.22274866</a>                                                                                                                                                                                                                                                                                            |
| 7 | Preprint      | Rao S, Lee GM, Razzaghi H, et al. Clinical Features and Burden of Postacute Sequelae of SARS-CoV-2 Infection in Children and Adolescents. JAMA Pediatr. 2022;176(10):1000-1009. doi:10.1001/jamapediatrics.2022.2800                                                                                                                                                                                                                                                                                                                                                                           |
| 8 | Preprint      | Nugawela, M. D., Stephenson, T., Shafran, R., Stavola, B. L. de, Ladhani, S. N., Simmons, R., McOwatt, K., Rojas, N., Cheung, E. Y., Ford, T., Heyman, I., Crawley, E., & Pereira, S. M. P. (2022). Developing a model for predicting                                                                                                                                                                                                                                                                                                                                                          |

|           |          |                                                                                                                                                                                                                                                                                                                                          |
|-----------|----------|------------------------------------------------------------------------------------------------------------------------------------------------------------------------------------------------------------------------------------------------------------------------------------------------------------------------------------------|
|           |          | impairing physical symptoms in children 3 months after a SARS-CoV-2 PCR-test: The CLoCk Study. MedRxiv, 2022.04.01.22273117.doi.org/10.1101/2022.04.01.22273117                                                                                                                                                                          |
| <b>9</b>  | Preprint | Heiss R, Tan L, Schmidt S, et al. Pulmonary Dysfunction after Pediatric COVID-19. Radiology. 2023;306(3):e221250. doi:10.1148/radiol.221250                                                                                                                                                                                              |
| <b>10</b> | Article  | Jarupan M, Jantarabenjakul W, Jaruampornpan P, et al. Long COVID and Hybrid Immunity among Children and Adolescents Post-Delta Variant Infection in Thailand. Vaccines (Basel). 2023;11(5):884. Published 2023 Apr 23. doi:10.3390/vaccines11050884                                                                                      |
| <b>11</b> | Article  | Buonsenso D, Morello R, Mariani F, et al. Risk of long Covid in children infected with Omicron or pre-Omicron SARS-CoV-2 variants. Acta Paediatr. 2023;112(6):1284-1286. doi:10.1111/apa.16764                                                                                                                                           |
| <b>12</b> | Article  | Pinto Pereira SM, Mensah A, Nugawela MD, et al. Long COVID in Children and Young after Infection or Reinfection with the Omicron Variant: A Prospective Observational Study [published online ahead of print, 2023 May 11]. J Pediatr. 2023;259:113463. doi:10.1016/j.jpeds.2023.113463                                                  |
| <b>13</b> | Article  | Buonsenso D, Morello R, Mariani F, De Rose C, Cortese R, Vetrugno L, Valentini P. Role of Lung Ultrasound in the Follow-Up of Children with Previous SARS-CoV-2 Infection: A Case-Control Assessment of Children with Long COVID or Fully Recovered. Journal of Clinical Medicine. 2023; 12(9):3342. https://doi.org/10.3390/jcm12093342 |
| <b>14</b> | Article  | Garai R, Krivácsy P, Herczeg V, et al. Clinical assessment of children with long COVID syndrome. Pediatr Res. 2023;93(6):1616-1625. doi:10.1038/s41390-022-02378-0                                                                                                                                                                       |
| <b>15</b> | Article  | Ertesvåg NU, Iversen A, Blomberg B, et al. Post COVID-19 condition after delta infection and omicron reinfection in children and adolescents. EBioMedicine. 2023;92:104599. doi:10.1016/j.ebiom.2023.104599                                                                                                                              |
| <b>16</b> | Article  | Shachar-Lavie I, Shorer M, Segal H, Fennig S, Ashkenazi-Hoffnung L. Mental health among children with long COVID during the COVID-19 pandemic. Eur J Pediatr. 2023;182(4):1793-1801. doi:10.1007/s00431-023-04854-z                                                                                                                      |
| <b>17</b> | Article  | Prato A, Salerno AM, Saia F, et al. Symptoms compatible with long COVID in an Italian pediatric cohort of Tourette patients with and without SARS-CoV-2 infection: a short-term follow-up assessment. BMC Pediatr. 2023;23(1):222. Published 2023 May 5. doi:10.1186/s12887-023-04035-9                                                  |
| <b>18</b> | Article  | Angarita-Fonseca A, Torres-Castro R, Benavides-Cordoba V, et al. Exploring long COVID condition in Latin America: Its impact on patients' activities and associated healthcare use. Front Med (Lausanne). 2023;10:1168628. Published 2023 Apr 20. doi:10.3389/fmed.2023.1168628                                                          |
| <b>19</b> | Article  | Ahn B, Choi SH, Yun KW. Non-neuropsychiatric Long COVID Symptoms in Children Visiting a Pediatric Infectious Disease Clinic After an Omicron Surge. Pediatr Infect Dis J. 2023;42(5):e143-e145.                                                                                                                                          |

|           |         |                                                                                                                                                                                                                                                                                                                                                                                    |
|-----------|---------|------------------------------------------------------------------------------------------------------------------------------------------------------------------------------------------------------------------------------------------------------------------------------------------------------------------------------------------------------------------------------------|
|           |         | doi:10.1097/INF.0000000000003862                                                                                                                                                                                                                                                                                                                                                   |
| <b>20</b> | Article | Warren-Gash C, Lacey A, Cook S, et al. Post-COVID-19 condition and persisting symptoms in English schoolchildren: repeated surveys to March 2022. <i>BMC Infect Dis.</i> 2023;23(1):201. Published 2023 Apr 5. doi:10.1186/s12879-023-08203-1                                                                                                                                      |
| <b>21</b> | Article | Miller F, Nguyen DV, Navaratnam AM, et al. Prevalence and Characteristics of Persistent Symptoms in Children During the COVID-19 Pandemic: Evidence From a Household Cohort Study in England and Wales [published correction appears in <i>Pediatr Infect Dis J.</i> 2023 May 1;42(5):438-439]. <i>Pediatr Infect Dis J.</i> 2022;41(12):979-984. doi:10.1097/INF.0000000000003715 |
| <b>22</b> | Article | Pizzuto DA, Buonsenso D, Morello R, et al. Lung perfusion assessment in children with long-COVID: A pilot study. <i>Pediatr Pulmonol.</i> 2023;58(7):2059-2067. doi:10.1002/ppul.26432                                                                                                                                                                                             |
| <b>23</b> | Article | Gräger S, Pfirschke R, Lorenz M, et al. Lung ultrasound in children and adolescents with long-term effects of COVID-19: Initial results. <i>Front Pediatr.</i> 2023;11:1112881. Published 2023 Mar 24. doi:10.3389/fped.2023.1112881                                                                                                                                               |
| <b>24</b> | Article | Morello R, Mariani F, Mastrantoni L, et al. Risk factors for post-COVID-19 condition (Long Covid) in children: a prospective cohort study. <i>EClinicalMedicine.</i> 2023;59:101961. doi:10.1016/j.eclinm.2023.101961                                                                                                                                                              |
| <b>25</b> | Article | Atchison CJ, Whitaker M, Donnelly CA, et al. Characteristics and predictors of persistent symptoms post-COVID-19 in children and young people: a large community cross-sectional study in England. <i>Arch Dis Child.</i> 2023;108(7):e12. doi:10.1136/archdischild-2022-325152                                                                                                    |
| <b>26</b> | Article | Pinto Pereira SM, Nugawela MD, Rojas NK, et al. Post-COVID-19 condition at 6 months and COVID-19 vaccination in non-hospitalised children and young people. <i>Arch Dis Child.</i> 2023;108(4):289-295. doi:10.1136/archdischild-2022-324656                                                                                                                                       |
| <b>27</b> | Article | Selvakumar J, Havdal LB, Drevvatne M, et al. Prevalence and Characteristics Associated With Post-COVID-19 Condition Among Nonhospitalized Adolescents and Young Adults. <i>JAMA Netw Open.</i> 2023;6(3):e235763. Published 2023 Mar 1. doi:10.1001/jamanetworkopen.2023.5763                                                                                                      |
| <b>28</b> | Article | Strawn JR, Mills JA, Schroeder HK, Neptune ZA, Specht A, Keeshin SW. The Impact of COVID-19 Infection and Characterization of Long COVID in Adolescents With Anxiety Disorders: A Prospective Longitudinal Study. <i>J Am Acad Child Adolesc Psychiatry.</i> 2023;62(7):707-709. doi:10.1016/j.jaac.2022.12.027                                                                    |
| <b>29</b> | Article | Alsagheir A, Amer S, Alzubaidi L, Alenezi F, Alamaa T, Asiri A. A National Survey of Children, Adults, and the Elderly in the Fourth Wave of the COVID-19 Pandemic to Compare Acute and Post-COVID-19 Conditions in Saudi Arabia. <i>J Clin Med.</i> 2023;12(6):2242. Published 2023 Mar 14. doi:10.3390/jcm12062242                                                               |

|    |         |                                                                                                                                                                                                                                                                                                                                                            |
|----|---------|------------------------------------------------------------------------------------------------------------------------------------------------------------------------------------------------------------------------------------------------------------------------------------------------------------------------------------------------------------|
| 30 | Article | Heiss R, Tan L, Schmidt S, et al. Pulmonary Dysfunction after Pediatric COVID-19. <i>Radiology</i> . 2023;306(3):e221250. doi:10.1148/radiol.221250                                                                                                                                                                                                        |
| 31 | Article | Baptista de Lima J, Salazar L, Fernandes A, Teixeira C, Marques L, Afonso C. Long COVID in Children and Adolescents: A Retrospective Study in a Pediatric Cohort. <i>Pediatr Infect Dis J</i> . 2023;42(4):e109-e111. doi:10.1097/INF.0000000000003829                                                                                                     |
| 32 | Article | Bogusławski S, Strzelak A, Gajko K, et al. The outcomes of COVID-19 pneumonia in children-clinical, radiographic, and pulmonary function assessment. <i>Pediatr Pulmonol</i> . 2023;58(4):1042-1050. doi:10.1002/ppul.26291                                                                                                                                |
| 33 | Article | Adler L, Israel M, Yehoshua I, et al. Long COVID symptoms in Israeli children with and without a history of SARS-CoV-2 infection: a cross-sectional study. <i>BMJ Open</i> . 2023;13(2):e064155. Published 2023 Feb 21. doi:10.1136/bmjopen-2022-064155                                                                                                    |
| 34 | Article | Goretzki SC, Brasseler M, Dogan B, et al. High Prevalence of Alternative Diagnoses in Children and Adolescents with Suspected Long COVID-A Single Center Cohort Study. <i>Viruses</i> . 2023;15(2):579. Published 2023 Feb 20. doi:10.3390/v15020579                                                                                                       |
| 35 | Article | Stephenson T, Pinto Pereira SM, Nugawela MD, et al. Long COVID-six months of prospective follow-up of changes in symptom profiles of non-hospitalised children and young people after SARS-CoV-2 testing: A national matched cohort study (The CLoCk) study. <i>PLoS One</i> . 2023;18(3):e0277704. Published 2023 Mar 6. doi:10.1371/journal.pone.0277704 |
| 36 | Article | Katsuta T, Aizawa Y, Shoji K, et al. Acute and Postacute Clinical Characteristics of Coronavirus Disease 2019 in Children in Japan. <i>Pediatr Infect Dis J</i> . 2023;42(3):240-246. doi:10.1097/INF.0000000000003792                                                                                                                                     |
| 37 | Article | Güven D, Buluş AD. Clinical and laboratory predictors of long-COVID in children: a single center retrospective study. <i>Eur Rev Med Pharmacol Sci</i> . 2022;26(20):7695-7704. doi:10.26355/eurrev_202210_30046                                                                                                                                           |
| 38 | Article | Seery V, Raiden S, Penedo JMG, et al. Persistent symptoms after COVID-19 in children and adolescents from Argentina. <i>Int J Infect Dis</i> . 2023;129:49-56. doi:10.1016/j.ijid.2023.01.031                                                                                                                                                              |
| 39 | Article | Sakurada Y, Otsuka Y, Tokumasu K, et al. Trends in Long COVID Symptoms in Japanese Teenage Patients. <i>Medicina (Kaunas)</i> . 2023;59(2):261. Published 2023 Jan 29. doi:10.3390/medicina59020261                                                                                                                                                        |
| 40 | Article | Mizrahi B, Sudry T, Flaks-Manov N, et al. Long covid outcomes at one year after mild SARS-CoV-2 infection: nationwide cohort study. <i>BMJ</i> . 2023;380:e072529. Published 2023 Jan 11. doi:10.1136/bmj-2022-072529                                                                                                                                      |
| 41 | Article | Buonsenso D, Pazukhina E, Gentili C, et al. The Prevalence, Characteristics and Risk Factors of Persistent Symptoms in Non-Hospitalized and Hospitalized Children with SARS-CoV-2 Infection Followed-Up for up to 12 Months: A Prospective, Cohort Study in Rome, Italy. <i>J Clin Med</i> . 2022;11(22):6772. Published 2022 Nov 16.                      |

|    |         |                                                                                                                                                                                                                                                                                                        |
|----|---------|--------------------------------------------------------------------------------------------------------------------------------------------------------------------------------------------------------------------------------------------------------------------------------------------------------|
|    |         | doi:10.3390/jcm11226772                                                                                                                                                                                                                                                                                |
| 42 | Article | Sommen SL, Havdal LB, Selvakumar J, et al. Inflammatory markers and pulmonary function in adolescents and young adults 6 months after mild COVID-19. <i>Front Immunol.</i> 2023;13:1081718. Published 2023 Jan 6. doi:10.3389/fimmu.2022.1081718                                                       |
| 43 | Article | Jamaica Balderas LMDC, Navarro Fernández A, Dragustinovis Garza SA, et al. Long COVID in children and adolescents: COVID-19 follow-up results in third-level pediatric hospital. <i>Front Pediatr.</i> 2023;11:1016394. Published 2023 Jan 30. doi:10.3389/fped.2023.1016394                           |
| 44 | Article | Horikoshi Y, Shibata M, Funakoshi H, Baba S, Miyama S. Post coronavirus disease 2019 condition in children at a children's hospital in Japan. <i>Pediatr Int.</i> 2023;65(1):e15458. doi:10.1111/ped.15458                                                                                             |
| 45 | Article | Hicks SD. Comparison of Symptom Duration Between Children With SARS-CoV-2 and Peers With Other Viral Illnesses During the COVID-19 Pandemic [published online ahead of print, 2023 Feb 7]. <i>Clin Pediatr (Phila).</i> 2023;99228231152840. doi:10.1177/00099228231152840                             |
| 46 | Article | Haneef R, Fayad M, Fouillet A, et al. Direct impact of COVID-19 by estimating disability-adjusted life years at national level in France in 2020. <i>PLoS One.</i> 2023;18(1):e0280990. Published 2023 Jan 24. doi:10.1371/journal.pone.0280990                                                        |
| 47 | Article | Roessler M, Tesch F, Batram M, et al. Post-COVID-19-associated morbidity in children, adolescents, and adults: A matched cohort study including more than 157,000 individuals with COVID-19 in Germany. <i>PLoS Med.</i> 2022;19(11):e1004122. Published 2022 Nov 10. doi:10.1371/journal.pmed.1004122 |
| 48 | Article | Garazzino S, Denina M, Pruccoli G, Funicello E, Ramenghi U, Fagioli F. Long COVID-19/post-COVID condition in children: do we all speak the same language?. <i>Ital J Pediatr.</i> 2023;49(1):12. Published 2023 Jan 20. doi:10.1186/s13052-023-01417-8                                                 |
| 49 | Article | Walter N, Rupp M, Lang S, et al. A Comprehensive Report of German Nationwide Inpatient Data on the Post-COVID-19 Syndrome Including Annual Direct Healthcare Costs. <i>Viruses.</i> 2022;14(12):2600. Published 2022 Nov 22. doi:10.3390/v14122600                                                     |
| 50 | Article | Valenzuela G, Alarcón-Andrade G, Schulze-Schiapacasse C, et al. Short-term complications and post-acute sequelae in hospitalized paediatric patients with COVID-19 and obesity: A multicenter cohort study. <i>Pediatr Obes.</i> 2023;18(2):e12980. doi:10.1111/ijpo.12980                             |
| 51 | Article | Nugawela MD, Stephenson T, Shafran R, et al. Predictive model for long COVID in children 3 months after a SARS-CoV-2 PCR test. <i>BMC Med.</i> 2022;20(1):465. Published 2022 Nov 30. doi:10.1186/s12916-022-02664-y                                                                                   |

|    |         |                                                                                                                                                                                                                                                                                                              |
|----|---------|--------------------------------------------------------------------------------------------------------------------------------------------------------------------------------------------------------------------------------------------------------------------------------------------------------------|
| 52 | Article | Kostev K, Smith L, Koyanagi A, Konrad M, Jacob L. Post-COVID-19 conditions in children and adolescents diagnosed with COVID-19 [published online ahead of print, 2022 May 14]. <i>Pediatr Res.</i> 2022;1-6. doi:10.1038/s41390-022-02111-x                                                                  |
| 53 | Article | Buonsenso D, Valentini P, De Rose C, et al. Recovering or Persisting: The Immunopathological Features of SARS-CoV-2 Infection in Children. <i>J Clin Med.</i> 2022;11(15):4363. Published 2022 Jul 27. doi:10.3390/jcm11154363                                                                               |
| 54 | Article | Brasseler M, Schönecker A, Steindor M, et al. Development of restrictive eating disorders in children and adolescents with long-COVID-associated smell and taste dysfunction. <i>Front Pediatr.</i> 2022;10:1022669. Published 2022 Nov 24. doi:10.3389/fped.2022.1022669                                    |
| 55 | Article | Dumont R, Nehme M, Lorthe E, et al. Persistent symptoms after SARS-CoV-2 infection in children: a cross-sectional population-based serological study. <i>BMJ Open.</i> 2022;12(11):e063504. Published 2022 Nov 21. doi:10.1136/bmjopen-2022-063504                                                           |
| 56 | Article | Uysal B, Akça T, Akacı O, Uysal F. The Prevalence of Post-COVID-19 Hypertension in Children. <i>Clin Pediatr (Phila).</i> 2022;61(7):453-460. doi:10.1177/00099228221085346                                                                                                                                  |
| 57 | Article | Dumont R, Richard V, Lorthe E, et al. A population-based serological study of post-COVID syndrome prevalence and risk factors in children and adolescents. <i>Nat Commun.</i> 2022;13(1):7086. Published 2022 Nov 29. doi:10.1038/s41467-022-34616-8                                                         |
| 58 | Article | Kikkenborg Berg S, Palm P, Nygaard U, et al. Long COVID symptoms in SARS-CoV-2-positive children aged 0-14 years and matched controls in Denmark (LongCOVIDKidsDK): a national, cross-sectional study. <i>Lancet Child Adolesc Health.</i> 2022;6(9):614-623. doi:10.1016/S2352-4642(22)00154-7              |
| 59 | Article | Doshi JA, Sheils NE, Buresh J, et al. SARS-CoV-2 Sequelae and Postdischarge Health Care Visits Over 5 Months Follow-up Among Children Hospitalized for COVID-19 or MIS-C. <i>Pediatr Infect Dis J.</i> 2022;41(12):e513-e516. doi:10.1097/INF.0000000000003692                                               |
| 60 | Article | Donnachie E, Hapfelmeier A, Linde K, et al. Incidence of post-COVID syndrome and associated symptoms in outpatient care in Bavaria, Germany: a retrospective cohort study using routinely collected claims data. <i>BMJ Open.</i> 2022;12(9):e064979. Published 2022 Sep 22. doi:10.1136/bmjopen-2022-064979 |
| 61 | Article | Ng R, Vargas G, Jashar DT, Morrow A, Malone LA. Neurocognitive and Psychosocial Characteristics of Pediatric Patients With Post-Acute/Long-COVID: A Retrospective Clinical Case Series. <i>Arch Clin Neuropsychol.</i> 2022;37(8):1633-1643. doi:10.1093/arclin/acac056                                      |
| 62 | Article | Messiah SE, Xie L, Mathew MS, et al. Comparison of Long-Term Complications of COVID-19 Illness among a Diverse Sample of Children by MIS-C Status. <i>Int J Environ Res Public Health.</i> 2022;19(20):13382. Published 2022 Oct 17.                                                                         |

|    |         |                                                                                                                                                                                                                                                                                                                  |
|----|---------|------------------------------------------------------------------------------------------------------------------------------------------------------------------------------------------------------------------------------------------------------------------------------------------------------------------|
|    |         | doi:10.3390/ijerph192013382                                                                                                                                                                                                                                                                                      |
| 63 | Article | Buchhorn R. Dysautonomia in Children with Post-Acute Sequelae of Coronavirus 2019 Disease and/or Vaccination. <i>Vaccines (Basel)</i> . 2022;10(10):1686. Published 2022 Oct 9. doi:10.3390/vaccines10101686                                                                                                     |
| 64 | Article | Knoke L, Schlegtendal A, Maier C, Eitner L, Lücke T, Brinkmann F. Pulmonary Function and Long-Term Respiratory Symptoms in Children and Adolescents After COVID-19. <i>Front Pediatr</i> . 2022;10:851008. Published 2022 Apr 25. doi:10.3389/fped.2022.851008                                                   |
| 65 | Article | Di Gennaro L, Valentini P, Sorrentino S, et al. Extended coagulation profile of children with Long Covid: a prospective study. <i>Sci Rep</i> . 2022;12(1):18392. Published 2022 Nov 1. doi:10.1038/s41598-022-23168-y                                                                                           |
| 66 | Article | Koumpias AM, Schwartzman D, Fleming O. Long-haul COVID: healthcare utilization and medical expenditures 6 months post-diagnosis. <i>BMC Health Serv Res</i> . 2022;22(1):1010. Published 2022 Aug 8. doi:10.1186/s12913-022-08387-3                                                                              |
| 67 | Article | Blankenburg J, Wekenborg MK, Reichert J, et al. Comparison of mental health outcomes in seropositive and seronegative adolescents during the COVID19 pandemic. <i>Sci Rep</i> . 2022;12(1):2246. Published 2022 Feb 10. doi:10.1038/s41598-022-06166-y                                                           |
| 68 | Article | Funk AL, Kuppermann N, Florin TA, et al. Post-COVID-19 Conditions Among Children 90 Days After SARS-CoV-2 Infection [published correction appears in <i>JAMA Netw Open</i> . 2022 Aug 1;5(8):e2231131]. <i>JAMA Netw Open</i> . 2022;5(7):e2223253. Published 2022 Jul 1. doi:10.1001/jamanetworkopen.2022.23253 |
| 69 | Article | Merzon E, Weiss M, Krone B, et al. Clinical and Socio-Demographic Variables Associated with the Diagnosis of Long COVID Syndrome in Youth: A Population-Based Study. <i>Int J Environ Res Public Health</i> . 2022;19(10):5993. Published 2022 May 15. doi:10.3390/ijerph19105993                                |
| 70 | Article | Rao S, Lee GM, Razzaghi H, et al. Clinical Features and Burden of Postacute Sequelae of SARS-CoV-2 Infection in Children and Adolescents. <i>JAMA Pediatr</i> . 2022;176(10):1000-1009. doi:10.1001/jamapediatrics.2022.2800                                                                                     |
| 71 | Article | Buonsenso D, Pujol FE, Munblit D, Pata D, McFarland S, Simpson FK. Clinical characteristics, activity levels and mental health problems in children with long coronavirus disease: a survey of 510 children. <i>Future Microbiol</i> . 2022;17(8):577-588. doi:10.2217/fmb-2021-0285                             |
| 72 | Article | Messiah SE, Hao T, DeSantis SM, et al. Comparison of Persistent Symptoms Following SARS-CoV-2 Infection by Antibody Status in Nonhospitalized Children and Adolescents. <i>Pediatr Infect Dis J</i> . 2022;41(10):e409-e417. doi:10.1097/INF.0000000000003653                                                    |

|    |         |                                                                                                                                                                                                                                                                                                                                                 |
|----|---------|-------------------------------------------------------------------------------------------------------------------------------------------------------------------------------------------------------------------------------------------------------------------------------------------------------------------------------------------------|
| 73 | Article | Haddad A, Janda A, Renk H, et al. Long COVID symptoms in exposed and infected children, adolescents and their parents one year after SARS-CoV-2 infection: A prospective observational cohort study. <i>EBioMedicine</i> . 2022;84:104245. doi:10.1016/j.ebiom.2022.104245                                                                      |
| 74 | Article | Saini L, Krishna D, Tiwari S, et al. Post-COVID-19 Immune-Mediated Neurological Complications in Children: An Ambispective Study. <i>Pediatr Neurol</i> . 2022;136:20-27. doi:10.1016/j.pediatrneurol.2022.06.010                                                                                                                               |
| 75 | Article | Helmsdal G, Hanusson KD, Kristiansen MF, et al. Long COVID in the Long Run-23-Month Follow-up Study of Persistent Symptoms. <i>Open Forum Infect Dis</i> . 2022;9(7):ofac270. Published 2022 Jun 6. doi:10.1093/ofid/ofac270                                                                                                                    |
| 76 | Article | Guido CA, Lucidi F, Midulla F, et al. Neurological and psychological effects of long COVID in a young population: A cross-sectional study. <i>Front Neurol</i> . 2022;13:925144. Published 2022 Aug 17. doi:10.3389/fneur.2022.925144                                                                                                           |
| 77 | Article | Tarantino S, Graziano S, Carducci C, Giampaolo R, Grimaldi Capitello T. Cognitive Difficulties, Psychological Symptoms, and Long Lasting Somatic Complaints in Adolescents with Previous SARS-CoV-2 Infection: A Telehealth Cross-Sectional Pilot Study. <i>Brain Sci</i> . 2022;12(8):969. Published 2022 Jul 23. doi:10.3390/brainsci12080969 |
| 78 | Article | Asadi-Pooya AA, Nemati M, Nemati H. 'Long COVID': Symptom persistence in children hospitalised for COVID-19. <i>J Paediatr Child Health</i> . 2022;58(10):1836-1840. doi:10.1111/jpc.16120                                                                                                                                                      |
| 79 | Article | Kuczborska K, Buda P, Książyk J. Long-COVID in immunocompromised children. <i>Eur J Pediatr</i> . 2022;181(9):3501-3509. doi:10.1007/s00431-022-04561-1                                                                                                                                                                                         |
| 80 | Article | Palacios S, Krivchenia K, Eisner M, et al. Long-term pulmonary sequelae in adolescents post-SARS-CoV-2 infection. <i>Pediatr Pulmonol</i> . 2022;57(10):2455-2463. doi:10.1002/ppul.26059                                                                                                                                                       |
| 81 | Article | Bloise S, Isoldi S, Marcellino A, et al. Clinical picture and long-term symptoms of SARS-CoV-2 infection in an Italian pediatric population. <i>Ital J Pediatr</i> . 2022;48(1):79. Published 2022 May 21. doi:10.1186/s13052-022-01270-1                                                                                                       |
| 82 | Article | Petersen MS, Kristiansen MF, Hanusson KD, et al. Prevalence of long COVID in a national cohort: longitudinal measures from disease onset until 8 months' follow-up. <i>Int J Infect Dis</i> . 2022;122:437-441. doi:10.1016/j.ijid.2022.06.031                                                                                                  |
| 83 | Article | Bode SFN, Haendly M, Fabricius D, et al. Pulmonary Function and Persistent Clinical Symptoms in Children and Their Parents 12 Months After Mild SARS-CoV-2 Infection. <i>Front Pediatr</i> . 2022;10:894331. Published 2022 Jun 30. doi:10.3389/fped.2022.894331                                                                                |
| 84 | Article | Pazukhina E, Andreeva M, Spiridonova E, et al. Prevalence and risk factors of post-COVID-19 condition in adults and children at 6 and 12 months after hospital discharge: a prospective, cohort study in Moscow (StopCOVID). <i>BMC Med</i> .                                                                                                   |



|    |         |                                                                                                                                                                                                                                                                                                         |
|----|---------|---------------------------------------------------------------------------------------------------------------------------------------------------------------------------------------------------------------------------------------------------------------------------------------------------------|
|    |         | 2022;20(1):244. Published 2022 Jul 6. doi:10.1186/s12916-022-02448-4                                                                                                                                                                                                                                    |
| 85 | Article | Öztürk GK, Beken B, Doğan S, Akar HH. Pulmonary function tests in the follow-up of children with COVID-19. <i>Eur J Pediatr.</i> 2022;181(7):2839-2847. doi:10.1007/s00431-022-04493-w                                                                                                                  |
| 86 | Article | Buonsenso D, Munblit D, Pazukhina E, et al. Post-COVID Condition in Adults and Children Living in the Same Household in Italy: A Prospective Cohort Study Using the ISARIC Global Follow-Up Protocol. <i>Front Pediatr.</i> 2022;10:834875. Published 2022 Apr 21. doi:10.3389/fped.2022.834875         |
| 87 | Article | Bergia M, Sanchez-Marcos E, Gonzalez-Haba B, et al. Comparative study shows that 1 in 7 Spanish children with COVID-19 symptoms were still experiencing issues after 12 weeks. <i>Acta Paediatr.</i> 2022;111(8):1573-1582. doi:10.1111/apa.16368                                                       |
| 88 | Article | Burgos-Blasco B, Güemes-Villahoz N, Morales-Fernandez L, et al. Retinal nerve fibre layer and ganglion cell layer changes in children who recovered from COVID-19: a cohort study. <i>Arch Dis Child.</i> 2022;107(2):175-179. doi:10.1136/archdischild-2021-321803                                     |
| 89 | Article | Trapani G, Verlato G, Bertino E, et al. Long COVID-19 in children: an Italian cohort study. <i>Ital J Pediatr.</i> 2022;48(1):83. Published 2022 Jun 3. doi:10.1186/s13052-022-01282-x                                                                                                                  |
| 90 | Article | Doležalová K, Tuková J, Pohunek P. The respiratory consequences of COVID-19 lasted for a median of 4 months in a cohort of children aged 2-18 years of age. <i>Acta Paediatr.</i> 2022;111(6):1201-1206. doi:10.1111/apa.16297                                                                          |
| 91 | Article | Kikkenborg Berg S, Dam Nielsen S, Nygaard U, et al. Long COVID symptoms in SARS-CoV-2-positive adolescents and matched controls (LongCOVIDKidsDK): a national, cross-sectional study. <i>Lancet Child Adolesc Health.</i> 2022;6(4):240-248. doi:10.1016/S2352-4642(22)00004-9                          |
| 92 | Article | Esmailzadeh, H., Sanaei Dashti, A., Mortazavi, N. et al. Persistent cough and asthma-like symptoms post COVID-19 hospitalization in children. <i>BMC Infect Dis</i> 22, 244 (2022). <a href="https://doi.org/10.1186/s12879-022-07252-2">https://doi.org/10.1186/s12879-022-07252-2</a>                 |
| 93 | Article | Akçay E, Çöp E, Dinç GS, et al. Loneliness, internalizing symptoms, and inflammatory markers in adolescent COVID-19 survivors. <i>Child Care Health Dev.</i> 2022;48(6):1112-1121. doi:10.1111/cch.13043                                                                                                |
| 94 | Article | Maddux AB, Berbert L, Young CC, et al. Health Impairments in Children and Adolescents After Hospitalization for Acute COVID-19 or MIS-C. <i>Pediatrics.</i> 2022;150(3):e2022057798. doi:10.1542/peds.2022-057798                                                                                       |
| 95 | Article | Gonzalez-Aumatell A, Bovo MV, Carreras-Abad C, et al. Social, Academic, and Health Status Impact of Long COVID on Children and Young People: An Observational, Descriptive, and Longitudinal Cohort Study. <i>Children (Basel).</i> 2022;9(11):1677. Published 2022 Oct 31. doi:10.3390/children9111677 |

|                                      |                 |                                                                                                                                                                                                                                                                   |
|--------------------------------------|-----------------|-------------------------------------------------------------------------------------------------------------------------------------------------------------------------------------------------------------------------------------------------------------------|
| 96                                   | Article         | Lorman V, Rao S, Jhaveri R, et al. Understanding pediatric long COVID using a tree-based scan statistic approach: an EHR-based cohort study from the RECOVER Program. <i>JAMIA Open</i> . 2023;6(1):o0ad016. Published 2023 Mar 14. doi:10.1093/jamiaopen/o0ad016 |
| 97                                   | Article         | Sabatino J, Di Chiara C, Di Candia A, et al. Mid- and Long-Term Atrio-Ventricular Functional Changes in Children after Recovery from COVID-19. <i>J Clin Med</i> . 2022;12(1):186. Published 2022 Dec 26. doi:10.3390/jcm12010186                                 |
| 98                                   | Article         | Buonsenso D, Martino L, Morello R, De Rose C, Valentini P. Chronic Olfactory Dysfunction in Children with Long COVID: A Retrospective Study. <i>Children (Basel)</i> . 2022;9(8):1251. Published 2022 Aug 19. doi:10.3390/children9081251                         |
| 99                                   | Article         | Erol N, Alpınar A, Erol C, Sari E, Alkan K. Intriguing new faces of Covid-19: persisting clinical symptoms and cardiac effects in children. <i>Cardiol Young</i> . 2022;32(7):1085-1091. doi:10.1017/S1047951121003693                                            |
| <b>2b. Clinical trials protocols</b> |                 |                                                                                                                                                                                                                                                                   |
|                                      | <b>Trial ID</b> | <b>Study title</b>                                                                                                                                                                                                                                                |
| 1                                    | NCT05722717     | Genetic Risk Factors for Multi-system Inflammatory Syndrome in Children and Pediatric Post COVID Condition (GRIP)                                                                                                                                                 |
| 2                                    | NCT05793723     | Long-term Respiratory Complications in Infants With Perinatal COVID-19                                                                                                                                                                                            |
| 3                                    | NCT05638724     | Munich Long COVID Registry Study for Children, Adolescents and Adults (MLC-R)                                                                                                                                                                                     |
| 4                                    | NCT05633472     | The Roles of Vitamin D and Microbiome in Children With Post-acute COVID-19 Syndromes (PACS) and Long COVID                                                                                                                                                        |
| 5                                    | NCT05817006     | Research of the Long-COVID-19 Syndrome in the Children                                                                                                                                                                                                            |
| 6                                    | NCT05216549     | Water and Land-based Exercise for Children With Post COVID-19 Condition                                                                                                                                                                                           |
| 7                                    | NCT05745974     | Post COVID-19 Complications in Children                                                                                                                                                                                                                           |
| 8                                    | NCT05729217     | Long COVID Symptoms in SARS-CoV-2-positive Children in China                                                                                                                                                                                                      |
| 9                                    | NCT05799508     | Consequences of COVID-19 Infection for Child Health and Wellbeing: Protocol for a Prospective, Observational, Longitudinal Study in Children                                                                                                                      |

|                                         |                     |                                                                                                                                                                                                                                                 |
|-----------------------------------------|---------------------|-------------------------------------------------------------------------------------------------------------------------------------------------------------------------------------------------------------------------------------------------|
| <b>10</b>                               | NCT05582512         | Clinical Characteristics and Long Term Impact on Pediatric COVID-19 in Taiwan                                                                                                                                                                   |
| <b>11</b>                               | NCT05747534         | AT1001 for the Treatment of Long COVID                                                                                                                                                                                                          |
| <b>12</b>                               | NCT05705154         | Connecting Breath and Mind for CYP With Long COVID                                                                                                                                                                                              |
| <b>13</b>                               | NCT05566392         | Longterm Influence of Pediatric Long COVID Syndrome                                                                                                                                                                                             |
| <b>14</b>                               | NCT05445531         | Low-field Magnetic Resonance Imaging in Pediatric Post Covid-19                                                                                                                                                                                 |
| <b>15</b>                               | DRKS00029354        | "coverCHILD Telemonitoring"                                                                                                                                                                                                                     |
| <b>16</b>                               | DRKS00028742        | Post COVID Kids Bavaria (PoCO) study on long-term effects of coronavirus infections in children and adolescents in Bavaria: detection and early treatment of sequelae                                                                           |
| <b>17</b>                               | CTRI/2022/07/043846 | A study to understand the changes in lung after corona virus infection in children undergoing heart surgery, using ultrasound examination.                                                                                                      |
| <b>18</b>                               | DRKS00028523        | Long COVID in Children                                                                                                                                                                                                                          |
| <b>19</b>                               | ISRCTN99910769      | The impact of COVID-19 infection in newborns or in pregnancy on children's development at 18-24 months                                                                                                                                          |
| <b>20</b>                               | DRKS00028963        | Telemedicine-assisted rehabilitation after Covid-19 in children                                                                                                                                                                                 |
| <b>21</b>                               | TCTR20220510005     | The study to follow-up and provide holistic healthcare in children and adolescents (aged 6 months-18 years) following the COVID-19 infection                                                                                                    |
| <b>22</b>                               | DRKS00028539        | Determination of aerosol particle number and aerosol particle size distribution in exhaled air of healthy children as well as children with respiratory tract infections, especially also children with and after SARS-CoV2 infection/Covid-19. |
| <b>Total number of references - 212</b> |                     |                                                                                                                                                                                                                                                 |

### 3. THE LONG LIST OF OUTCOMES USED IN POST-COVID-19 CONDITION STUDIES.

| OUTCOME DOMAIN (PER COMET TAXONOMY*) | OUTCOME              | N = 1097 |
|--------------------------------------|----------------------|----------|
| 1. MORTALITY/SURVIVAL                | DEAD AFTER DISCHARGE |          |
| 1. MORTALITY/SURVIVAL                | MORBIDITY            |          |

|                                        |                                            |   |
|----------------------------------------|--------------------------------------------|---|
| 1. MORTALITY/SURVIVAL                  | MORTALITY                                  | 3 |
| 2. BLOOD AND LYMPHATIC SYSTEM OUTCOMES | ABNORMAL LAB RESULT (D-DIMER)              |   |
| 2. BLOOD AND LYMPHATIC SYSTEM OUTCOMES | COAGULATION ABNORMALITY                    |   |
| 2. BLOOD AND LYMPHATIC SYSTEM OUTCOMES | COAGULOPATHY AFTER COVID-19                |   |
| 2. BLOOD AND LYMPHATIC SYSTEM OUTCOMES | COVID-19-ASSOCIATED THROMBOSIS             |   |
| 2. BLOOD AND LYMPHATIC SYSTEM OUTCOMES | DISSEMINATED INTRAVASCULAR COAGULATION     |   |
| 2. BLOOD AND LYMPHATIC SYSTEM OUTCOMES | ENLARGED LYMPH NODES                       |   |
| 2. BLOOD AND LYMPHATIC SYSTEM OUTCOMES | BLOOD MARKERS CORRELATION WITH FOT INDICES |   |
| 2. BLOOD AND LYMPHATIC SYSTEM OUTCOMES | HEMOGLOBIN                                 |   |
| 2. BLOOD AND LYMPHATIC SYSTEM OUTCOMES | INCREASED/DECREASED/NORMAL RESULT          |   |
| 2. BLOOD AND LYMPHATIC SYSTEM OUTCOMES | LABORATORY ASSESSMENT                      |   |
| 2. BLOOD AND LYMPHATIC SYSTEM OUTCOMES | LABORATORY CHANGES                         |   |
| 2. BLOOD AND LYMPHATIC SYSTEM OUTCOMES | LEUCOCYTES $<4 \times 10^9/L$              |   |
| 2. BLOOD AND LYMPHATIC SYSTEM OUTCOMES | LEUKOCYTES                                 |   |
| 2. BLOOD AND LYMPHATIC SYSTEM OUTCOMES | LOW NEUTROPHILS                            |   |

|                                        |                                                                 |    |
|----------------------------------------|-----------------------------------------------------------------|----|
| 2. BLOOD AND LYMPHATIC SYSTEM OUTCOMES | LYMPHADENOPATHY                                                 |    |
| 2. BLOOD AND LYMPHATIC SYSTEM OUTCOMES | LYMPHOCYTES $<1.2 \times 10^9/L$                                |    |
| 2. BLOOD AND LYMPHATIC SYSTEM OUTCOMES | NEGATIVE D-DIMERS                                               |    |
| 2. BLOOD AND LYMPHATIC SYSTEM OUTCOMES | PBMC                                                            |    |
| 2. BLOOD AND LYMPHATIC SYSTEM OUTCOMES | SWOLLEN LYMPH GLANDS                                            |    |
| 2. BLOOD AND LYMPHATIC SYSTEM OUTCOMES | THROMBOCYTES                                                    | 20 |
| 3. CARDIAC OUTCOMES                    | ABNORMAL FINDINGS                                               |    |
| 3. CARDIAC OUTCOMES                    | BLOOD PRESSURE                                                  |    |
| 3. CARDIAC OUTCOMES                    | CARDIAC FUNCTION                                                |    |
| 3. CARDIAC OUTCOMES                    | CARDIAC FUNCTION AND EJECTION FRACTION CHANGES                  |    |
| 3. CARDIAC OUTCOMES                    | CARDIAC PALPITATIONS                                            |    |
| 3. CARDIAC OUTCOMES                    | CARDIAL ABNORMALITIES                                           |    |
| 3. CARDIAC OUTCOMES                    | CARDIOVASCULAR COMPLICATIONS                                    |    |
| 3. CARDIAC OUTCOMES                    | CARDIOVASCULAR SYMPTOMS                                         |    |
| 3. CARDIAC OUTCOMES                    | CARDIOVASCULAR SYSTEM                                           |    |
| 3. CARDIAC OUTCOMES                    | CARDITIS DUE TO VIRUSES                                         |    |
| 3. CARDIAC OUTCOMES                    | CORONARY ARTERY ABNORMALITIES                                   |    |
| 3. CARDIAC OUTCOMES                    | DAMAGE TO THE HEART                                             |    |
| 3. CARDIAC OUTCOMES                    | DIFFERENCE IN RELATIVE WALL THICKNESS                           |    |
| 3. CARDIAC OUTCOMES                    | DIFFERENCE IN TRICUSPID ANNULAR PLANE SYSTOLIC EXCURSION VALUES |    |
| 3. CARDIAC OUTCOMES                    | ELEVATED PULSE                                                  |    |
| 3. CARDIAC OUTCOMES                    | HEART FAILURE                                                   |    |

|                     |                                                                                     |  |
|---------------------|-------------------------------------------------------------------------------------|--|
| 3. CARDIAC OUTCOMES | HEART MURMURS                                                                       |  |
| 3. CARDIAC OUTCOMES | HEART POUNDING OR RACING                                                            |  |
| 3. CARDIAC OUTCOMES | HEART RATE ABNORMALITY                                                              |  |
| 3. CARDIAC OUTCOMES | HEART RHYTHM DISTURBANCES                                                           |  |
| 3. CARDIAC OUTCOMES | HIGHEST HEART RATE                                                                  |  |
| 3. CARDIAC OUTCOMES | HYPOTENSION                                                                         |  |
| 3. CARDIAC OUTCOMES | INTERVALS                                                                           |  |
| 3. CARDIAC OUTCOMES | LEFT VENTRICULAR POSTERIOR WALL DIAMETER                                            |  |
| 3. CARDIAC OUTCOMES | LOWEST HEART RATE                                                                   |  |
| 3. CARDIAC OUTCOMES | MAXIMAL PULSE WAS LOWER THAN THE AGE-SPECIFIC MEAN                                  |  |
| 3. CARDIAC OUTCOMES | MILD LATERAL WALL THICKENING                                                        |  |
| 3. CARDIAC OUTCOMES | MYOCARDIAL INFARCTION                                                               |  |
| 3. CARDIAC OUTCOMES | MYOCARDITIS                                                                         |  |
| 3. CARDIAC OUTCOMES | MYOCARDITIS AFTER COVID-19                                                          |  |
| 3. CARDIAC OUTCOMES | NORMAL LEFT VENTRICULAR EJECTION FRACTION AND THE ABSENCE OF PULMONARY HYPERTENSION |  |
| 3. CARDIAC OUTCOMES | ORTHOSTATIC INTOLERANCE                                                             |  |
| 3. CARDIAC OUTCOMES | OTHER CARDIAC ARRHYTHMIAS                                                           |  |
| 3. CARDIAC OUTCOMES | PAINS IN HEART OR CHEST                                                             |  |
| 3. CARDIAC OUTCOMES | PALPITATION                                                                         |  |
| 3. CARDIAC OUTCOMES | PALPITATION±CHEST PAIN                                                              |  |
| 3. CARDIAC OUTCOMES | PALPITATIONS                                                                        |  |
| 3. CARDIAC OUTCOMES | PALPITATIONS (HEART RACING)                                                         |  |
| 3. CARDIAC OUTCOMES | PALPITATIONS / TACHYCARDIA                                                          |  |
| 3. CARDIAC OUTCOMES | PERICARDITIS                                                                        |  |
| 3. CARDIAC OUTCOMES | PULMONARY HYPERTENSION                                                              |  |
| 3. CARDIAC OUTCOMES | RHYTHMS                                                                             |  |

|                                              |                                                                              |    |
|----------------------------------------------|------------------------------------------------------------------------------|----|
| 3. CARDIAC OUTCOMES                          | RIGHT VENTRICULAR SYSTOLIC FUNCTION (IN PATIENTS W/BIVENTRICULAR PHYSIOLOGY) |    |
| 3. CARDIAC OUTCOMES                          | SEVERE POST-COVID-19 COMPLICATIONS                                           |    |
| 3. CARDIAC OUTCOMES                          | SIGNIFICANT TACHYCARDIA FOR AGE                                              |    |
| 3. CARDIAC OUTCOMES                          | TACHYCARDIA                                                                  |    |
| 3. CARDIAC OUTCOMES                          | TACHYCARDIA/PALPITATION                                                      |    |
| 3. CARDIAC OUTCOMES                          | TRANSIENTLY ELEVATED TROPONIN LEVELS                                         |    |
| 3. CARDIAC OUTCOMES                          | TRICUSPID REGURGITATION SEVERITY                                             |    |
| 3. CARDIAC OUTCOMES                          | TYPE(S) AND NUMBER OF PULMONARY HYPERTENSION TARGETED THERAPIES              |    |
| 3. CARDIAC OUTCOMES                          | VARIATIONS IN HEART RATE                                                     |    |
| 3. CARDIAC OUTCOMES                          | VARIATIONS IN HEART RATE (TACHYCARDIA OR BRADYCARDIA)                        |    |
| 3. CARDIAC OUTCOMES                          | VELOCITY                                                                     |    |
| 3. CARDIAC OUTCOMES                          | VOLTAGES                                                                     | 54 |
| 4. CONGENITAL, FAMILIAL AND GENETIC OUTCOMES | GENETIC PREDISPOSITION                                                       |    |
| 4. CONGENITAL, FAMILIAL AND GENETIC OUTCOMES | GENETIC PREDISPOSITION IN CHILDREN TO COVID-19 LATE COMPLICATIONS            |    |
| 4. CONGENITAL, FAMILIAL AND GENETIC OUTCOMES | HUMAN AND VIRAL GENETIC MARKERS                                              | 3  |
| 5. ENDOCRINE OUTCOMES                        | TYPE 1 DIABETES AFTER COVID-19                                               |    |
| 5. ENDOCRINE OUTCOMES                        | TYPE 2 DIABETES AFTER COVID-19                                               |    |
| 5. ENDOCRINE OUTCOMES                        | TYPE 2 DIABETES                                                              | 3  |
| 6. EAR AND LABYRINTH OUTCOMES                | CHANGE IN HEARING/RINGING IN EARS                                            |    |
| 6. EAR AND LABYRINTH OUTCOMES                | EAR FULLNESS                                                                 |    |
| 6. EAR AND LABYRINTH OUTCOMES                | EAR PAIN                                                                     |    |
| 6. EAR AND LABYRINTH OUTCOMES                | EAR PAIN (OTALGIA)                                                           |    |
| 6. EAR AND LABYRINTH OUTCOMES                | EAR SYMPTOMS                                                                 |    |

|                               |                                                                          |    |
|-------------------------------|--------------------------------------------------------------------------|----|
| 6. EAR AND LABYRINTH OUTCOMES | EARACHE OR RINGING IN EARS                                               |    |
| 6. EAR AND LABYRINTH OUTCOMES | HEARING DEFICIT                                                          |    |
| 6. EAR AND LABYRINTH OUTCOMES | HEARING LOSS/TINNITUS                                                    |    |
| 6. EAR AND LABYRINTH OUTCOMES | HEARING PROBLEMS                                                         |    |
| 6. EAR AND LABYRINTH OUTCOMES | LOSS OF HEAR                                                             |    |
| 6. EAR AND LABYRINTH OUTCOMES | RINGING IN EARS (TINNITUS)                                               |    |
| 6. EAR AND LABYRINTH OUTCOMES | TINNITUS                                                                 |    |
| 6. EAR AND LABYRINTH OUTCOMES | VERTIGO                                                                  |    |
| 6. EAR AND LABYRINTH OUTCOMES | VERTIGO/WORLD SPINNING                                                   | 14 |
| 7. EYE OUTCOMES               | AVOIDING BRIGHT LIGHT (PHOTOPHOBIA)                                      |    |
| 7. EYE OUTCOMES               | BILATERAL CONJUNCTIVITIS                                                 |    |
| 7. EYE OUTCOMES               | BILATERAL CONJUNCTIVITIS (IF YES, PURULENT/NON-PURULENT)                 |    |
| 7. EYE OUTCOMES               | BLURRED VISION                                                           |    |
| 7. EYE OUTCOMES               | CHANGES IN VISION                                                        |    |
| 7. EYE OUTCOMES               | CONJUNCTIVITIS                                                           |    |
| 7. EYE OUTCOMES               | DRY EYES                                                                 |    |
| 7. EYE OUTCOMES               | EYE PAIN                                                                 |    |
| 7. EYE OUTCOMES               | EYE SORENESS                                                             |    |
| 7. EYE OUTCOMES               | EYE-SORENESS/DISCOMFORT (LIGHT SENSITIVITY/EXCESSIVE TEARS/PINK/RED EYE) |    |
| 7. EYE OUTCOMES               | FLASHES OF LIGHT (PHOTOPSIA)                                             |    |
| 7. EYE OUTCOMES               | FOVEAL AVASCULAR ZONE: AREA                                              |    |
| 7. EYE OUTCOMES               | FOVEAL AVASCULAR ZONE: CIRCULARITY                                       |    |
| 7. EYE OUTCOMES               | FOVEAL AVASCULAR ZONE: PERIMETER                                         |    |
| 7. EYE OUTCOMES               | HIGH FLUX INDEX                                                          |    |
| 7. EYE OUTCOMES               | INCREASE IN MACULAR PERFUSION DENSITY                                    |    |
| 7. EYE OUTCOMES               | INCREASE IN RETINAL VESSEL DENSITY                                       |    |



|                              |                                          |    |
|------------------------------|------------------------------------------|----|
| 7. EYE OUTCOMES              | INFERIOR FLUX INDEX                      |    |
| 7. EYE OUTCOMES              | INFERIOR PERIPAPILLARY PERFUSION DENSITY |    |
| 7. EYE OUTCOMES              | MACULAR PERFUSION DENSITY: CENTRAL       |    |
| 7. EYE OUTCOMES              | MACULAR PERFUSION DENSITY: INNER RING    |    |
| 7. EYE OUTCOMES              | MACULAR PERFUSION DENSITY: OUTER RING    |    |
| 7. EYE OUTCOMES              | NASAL FLUX INDEX                         |    |
| 7. EYE OUTCOMES              | NASAL PERIPAPILLARY PERFUSION DENSITY    |    |
| 7. EYE OUTCOMES              | OCULAR FINDINGS                          |    |
| 7. EYE OUTCOMES              | PHOTOPHOBIA                              |    |
| 7. EYE OUTCOMES              | PROBLEMS SEEING/ BLURRED VISION          |    |
| 7. EYE OUTCOMES              | PROBLEMS SEEING/BLURRED VISION           |    |
| 7. EYE OUTCOMES              | RED EYE SYNDROME                         |    |
| 7. EYE OUTCOMES              | SUPERIOR FLUX INDEX                      |    |
| 7. EYE OUTCOMES              | SUPERIOR PERIPAPILLARY PERFUSION DENSITY |    |
| 7. EYE OUTCOMES              | TEMPORAL PERIPAPILLARY PERFUSION DENSITY |    |
| 7. EYE OUTCOMES              | UNUSUAL EYE-SORENESS                     |    |
| 7. EYE OUTCOMES              | VESSEL DENSITY: CENTRAL                  |    |
| 7. EYE OUTCOMES              | VESSEL DENSITY: FULL AREA                |    |
| 7. EYE OUTCOMES              | VESSEL DENSITY: INNER RING               |    |
| 7. EYE OUTCOMES              | VESSEL DENSITY: OUTER RING               |    |
| 7. EYE OUTCOMES              | VISUAL ACUITY/HEARING PROBLEMS           |    |
| 7. EYE OUTCOMES              | VISUAL BLURRING                          |    |
| 7. EYE OUTCOMES              | VISUAL DEFICIT                           |    |
| 7. EYE OUTCOMES              | VISUAL DISTURBANCES                      | 41 |
| 8. GASTROINTESTINAL OUTCOMES | ABDOMINAL DISCOMFORT                     |    |
| 8. GASTROINTESTINAL OUTCOMES | ABDOMINAL PAIN                           |    |

|                              |                                                                                              |  |
|------------------------------|----------------------------------------------------------------------------------------------|--|
| 8. GASTROINTESTINAL OUTCOMES | ABDOMINAL PAIN/STOMACH ACHE ( <i>MILD AND TOLERABLE-MODERATE-SEVERE AND INCAPACITATING</i> ) |  |
| 8. GASTROINTESTINAL OUTCOMES | BLOATING                                                                                     |  |
| 8. GASTROINTESTINAL OUTCOMES | BOWEL INCONTINENCE                                                                           |  |
| 8. GASTROINTESTINAL OUTCOMES | CHANGE IN BOWEL HABITS                                                                       |  |
| 8. GASTROINTESTINAL OUTCOMES | COLITIS/DIARRHOEA                                                                            |  |
| 8. GASTROINTESTINAL OUTCOMES | CONSTIPATION                                                                                 |  |
| 8. GASTROINTESTINAL OUTCOMES | DIARRHEA                                                                                     |  |
| 8. GASTROINTESTINAL OUTCOMES | DIARRHOEA/VOMITING                                                                           |  |
| 8. GASTROINTESTINAL OUTCOMES | DYSPHAGIA                                                                                    |  |
| 8. GASTROINTESTINAL OUTCOMES | FECES                                                                                        |  |
| 8. GASTROINTESTINAL OUTCOMES | FEELING NAUSEOUS                                                                             |  |
| 8. GASTROINTESTINAL OUTCOMES | FLATULENCE                                                                                   |  |
| 8. GASTROINTESTINAL OUTCOMES | GASTROINTESTINAL DISORDERS                                                                   |  |
| 8. GASTROINTESTINAL OUTCOMES | GASTROINTESTINAL SYMPTOMS                                                                    |  |
| 8. GASTROINTESTINAL OUTCOMES | HEARTBURN                                                                                    |  |
| 8. GASTROINTESTINAL OUTCOMES | INTUSSUSCEPTION                                                                              |  |
| 8. GASTROINTESTINAL OUTCOMES | JAUNDICE                                                                                     |  |
| 8. GASTROINTESTINAL OUTCOMES | LOOSE STOOL                                                                                  |  |
| 8. GASTROINTESTINAL OUTCOMES | NAUSEA                                                                                       |  |
| 8. GASTROINTESTINAL OUTCOMES | NAUSEA OR UPSET STOMACH                                                                      |  |
| 8. GASTROINTESTINAL OUTCOMES | PAIN ABDOMEN                                                                                 |  |
| 8. GASTROINTESTINAL OUTCOMES | PATTERNS OF INTESTINAL MICROBIOME                                                            |  |
| 8. GASTROINTESTINAL OUTCOMES | SKIPPING MEALS                                                                               |  |
| 8. GASTROINTESTINAL OUTCOMES | STOMACH ACHE                                                                                 |  |
| 8. GASTROINTESTINAL OUTCOMES | STOMACH PAIN                                                                                 |  |
| 8. GASTROINTESTINAL OUTCOMES | STOMACH PAINS/CRAMPS                                                                         |  |

|                              |                                                                                                                                                                                         |    |
|------------------------------|-----------------------------------------------------------------------------------------------------------------------------------------------------------------------------------------|----|
| 8. GASTROINTESTINAL OUTCOMES | STOMACH/ ABDOMINAL PAIN                                                                                                                                                                 |    |
| 8. GASTROINTESTINAL OUTCOMES | STOMACH/ABDOMINAL PAIN                                                                                                                                                                  |    |
| 8. GASTROINTESTINAL OUTCOMES | STOMACHACHE                                                                                                                                                                             |    |
| 8. GASTROINTESTINAL OUTCOMES | TENDERNESS IN ABDOMEN                                                                                                                                                                   |    |
| 8. GASTROINTESTINAL OUTCOMES | TUMMY ACHE                                                                                                                                                                              |    |
| 8. GASTROINTESTINAL OUTCOMES | UNUSUAL ABDOMINAL PAIN                                                                                                                                                                  |    |
| 8. GASTROINTESTINAL OUTCOMES | VOMITING                                                                                                                                                                                |    |
| 8. GASTROINTESTINAL OUTCOMES | VOMITING AND ABDOMINAL PAIN                                                                                                                                                             |    |
| 8. GASTROINTESTINAL OUTCOMES | VOMITING/NAUSEA                                                                                                                                                                         |    |
| 8. GASTROINTESTINAL OUTCOMES | VOMITS                                                                                                                                                                                  | 38 |
| 9. GENERAL OUTCOMES          | ABNORMAL BODY MOVEMENTS                                                                                                                                                                 |    |
| 9. GENERAL OUTCOMES          | ABNORMAL FINDINGS                                                                                                                                                                       |    |
| 9. GENERAL OUTCOMES          | ACUTE PAIN                                                                                                                                                                              |    |
| 9. GENERAL OUTCOMES          | ADDITIONAL BIOMARKER ANALYSIS                                                                                                                                                           |    |
| 9. GENERAL OUTCOMES          | ANY CHRONIC MEDICAL ILLNESS/PROBLEM AFTER COVID-19                                                                                                                                      |    |
| 9. GENERAL OUTCOMES          | ASSESSMENT OF REHABILITATION                                                                                                                                                            |    |
| 9. GENERAL OUTCOMES          | ASTHENIA                                                                                                                                                                                |    |
| 9. GENERAL OUTCOMES          | BODY ACHES                                                                                                                                                                              |    |
| 9. GENERAL OUTCOMES          | BODY PAIN                                                                                                                                                                               |    |
| 9. GENERAL OUTCOMES          | CAUSE OF RECENT FEVER (COVID-19, OTHER RESPIRATORY INFECTION (COUGH/COLD/SORE THROAT), TB, STOMACH INFECTION (DIARRHEA/VOMITING), URINARY INFECTION, OTHER, UNKNOWN, PREFER NOT TO SAY) |    |
| 9. GENERAL OUTCOMES          | CHANGE IN SMELL                                                                                                                                                                         |    |
| 9. GENERAL OUTCOMES          | CHANGE IN TASTE                                                                                                                                                                         |    |
| 9. GENERAL OUTCOMES          | CHEST AND BACKACHE                                                                                                                                                                      |    |
| 9. GENERAL OUTCOMES          | CHEST TIGHTNESS                                                                                                                                                                         |    |
| 9. GENERAL OUTCOMES          | CHILD SYMPTOMS                                                                                                                                                                          |    |

|                     |                                                              |  |
|---------------------|--------------------------------------------------------------|--|
| 9. GENERAL OUTCOMES | CHILLS                                                       |  |
| 9. GENERAL OUTCOMES | CHILLS OR SHIVERS (FEEL TOO COLD)                            |  |
| 9. GENERAL OUTCOMES | CHRONIC FATIGUE                                              |  |
| 9. GENERAL OUTCOMES | CHRONIC FATIGUE SYNDROME                                     |  |
| 9. GENERAL OUTCOMES | CHRONIC FATIGUE SYNDROME-TYPE SYMPTOMS                       |  |
| 9. GENERAL OUTCOMES | CLINICAL OUTCOME                                             |  |
| 9. GENERAL OUTCOMES | COMPLETE REMISSION                                           |  |
| 9. GENERAL OUTCOMES | CONNECTEDNESS                                                |  |
| 9. GENERAL OUTCOMES | COVID-19 ASSOCIATED SECONDARY DISEASES PREDICTORS            |  |
| 9. GENERAL OUTCOMES | DAMAGE TO OTHER VITAL SYSTEMS WHICH CAUSED DEATH             |  |
| 9. GENERAL OUTCOMES | DAYTIME SLEEPINESS                                           |  |
| 9. GENERAL OUTCOMES | DECREASED APPETITE                                           |  |
| 9. GENERAL OUTCOMES | DEMOGRAPHICS                                                 |  |
| 9. GENERAL OUTCOMES | DIAGNOSES                                                    |  |
| 9. GENERAL OUTCOMES | DIFFICULTY FALLING ASLEEP                                    |  |
| 9. GENERAL OUTCOMES | DIFFICULTY SLEEPING                                          |  |
| 9. GENERAL OUTCOMES | DIFFICULTY SWALLOWING                                        |  |
| 9. GENERAL OUTCOMES | DISABILITY-ADJUSTED LIFE YEARS (DALY) LOST PER COVID-19 CASE |  |
| 9. GENERAL OUTCOMES | DISTANCE WALKED IN METERS AND % PREDICTED                    |  |
| 9. GENERAL OUTCOMES | DRY MOUTH                                                    |  |
| 9. GENERAL OUTCOMES | EASY FATIGABILITY                                            |  |
| 9. GENERAL OUTCOMES | EXCESS SWEATING                                              |  |
| 9. GENERAL OUTCOMES | EXCESSIVE FATIGUE                                            |  |
| 9. GENERAL OUTCOMES | EXCESSIVE NIGHT SWEAT                                        |  |
| 9. GENERAL OUTCOMES | EXCESSIVE SLEEPINESS                                         |  |
| 9. GENERAL OUTCOMES | EXHAUSTION                                                   |  |

|                     |                                                                                           |  |
|---------------------|-------------------------------------------------------------------------------------------|--|
| 9. GENERAL OUTCOMES | FACTORS RELATED TO THE SEVERITY                                                           |  |
| 9. GENERAL OUTCOMES | FATIGUE                                                                                   |  |
| 9. GENERAL OUTCOMES | FATIGUE AFTER COVID-19 (LESS/THE SAME/MORE)                                               |  |
| 9. GENERAL OUTCOMES | FATIGUE RELATED DISORDERS                                                                 |  |
| 9. GENERAL OUTCOMES | FATIGUE/LOW ENERGY                                                                        |  |
| 9. GENERAL OUTCOMES | FATIGUE/TIREDNESS                                                                         |  |
| 9. GENERAL OUTCOMES | FEEL SLEEPY OR DROWSY                                                                     |  |
| 9. GENERAL OUTCOMES | FEEL WEAK                                                                                 |  |
| 9. GENERAL OUTCOMES | FEELING RELAXED                                                                           |  |
| 9. GENERAL OUTCOMES | FEVER                                                                                     |  |
| 9. GENERAL OUTCOMES | FEVER (WITHIN THE LAST 7 D, 1-2 WKS, >2-4 WKS, >1-2 MO, >2-3 MO, >3-6 MO SINCE DISCHARGE) |  |
| 9. GENERAL OUTCOMES | FEVER >38.5°C                                                                             |  |
| 9. GENERAL OUTCOMES | GENERAL SYMPTOMS                                                                          |  |
| 9. GENERAL OUTCOMES | HEAD CIRCUMFERENCE                                                                        |  |
| 9. GENERAL OUTCOMES | HEALTH                                                                                    |  |
| 9. GENERAL OUTCOMES | HOT OR COLD SPELLS                                                                        |  |
| 9. GENERAL OUTCOMES | HYPERSOMNIA                                                                               |  |
| 9. GENERAL OUTCOMES | HYPOTHERMIA                                                                               |  |
| 9. GENERAL OUTCOMES | ILLNESS RESOLUTION                                                                        |  |
| 9. GENERAL OUTCOMES | IMAGING FINDING                                                                           |  |
| 9. GENERAL OUTCOMES | INCREASED DAYTIME FATIGUE                                                                 |  |
| 9. GENERAL OUTCOMES | INCREASED FATIGUE                                                                         |  |
| 9. GENERAL OUTCOMES | INCREASED NEED FOR SLEEP                                                                  |  |
| 9. GENERAL OUTCOMES | INCREASED SLEEP NEED                                                                      |  |
| 9. GENERAL OUTCOMES | INSOMNIA                                                                                  |  |
| 9. GENERAL OUTCOMES | INSOMNIA (HARD TO FALL ASLEEP, HARD TO STAY ASLEEP)                                       |  |

|                     |                                                                              |  |
|---------------------|------------------------------------------------------------------------------|--|
| 9. GENERAL OUTCOMES | LAB RESULTS OUT OF THE NORMAL RANGES                                         |  |
| 9. GENERAL OUTCOMES | LABORATORY PARAMETERS                                                        |  |
| 9. GENERAL OUTCOMES | LACK OF A GOOD NIGHT'S SLEEP                                                 |  |
| 9. GENERAL OUTCOMES | LACK OF ENERGY                                                               |  |
| 9. GENERAL OUTCOMES | LENGTH                                                                       |  |
| 9. GENERAL OUTCOMES | LENGTH OF COVID-19 SEQUELAE                                                  |  |
| 9. GENERAL OUTCOMES | LONG COVID SYMPTOMS                                                          |  |
| 9. GENERAL OUTCOMES | LONG COVID SYMPTOMS                                                          |  |
| 9. GENERAL OUTCOMES | LONG TERM OUTCOME (PREVALENCE AND RISK FACTORS OF LONG-LASTING COMPLICATION) |  |
| 9. GENERAL OUTCOMES | LONG-TERM CONSEQUENCES OF A COVID19 DISEASE (LONG-COVID)                     |  |
| 9. GENERAL OUTCOMES | LONG-TERM OUTCOMES OF COVID-19 IN PATIENTS DIAGNOSED WITH COVID-19           |  |
| 9. GENERAL OUTCOMES | A LUMP IN YOUR THROAT                                                        |  |
| 9. GENERAL OUTCOMES | MALAISE                                                                      |  |
| 9. GENERAL OUTCOMES | MALAISE/FATIGUE/EXHAUSTION                                                   |  |
| 9. GENERAL OUTCOMES | MEDICAL SEQUELAE                                                             |  |
| 9. GENERAL OUTCOMES | METALLIC TASTE                                                               |  |
| 9. GENERAL OUTCOMES | MIS                                                                          |  |
| 9. GENERAL OUTCOMES | MULTIPLE ORGAN FAILURE                                                       |  |
| 9. GENERAL OUTCOMES | NEED OF HOSPITAL ADMISSION                                                   |  |
| 9. GENERAL OUTCOMES | NEED TO REST MORE                                                            |  |
| 9. GENERAL OUTCOMES | NEWLY DIAGNOSED DISEASES                                                     |  |
| 9. GENERAL OUTCOMES | NIGHT SWEATING                                                               |  |
| 9. GENERAL OUTCOMES | NONSPECIFIC PAIN                                                             |  |
| 9. GENERAL OUTCOMES | NOT ELSEWHERE CLASSIFIED                                                     |  |
| 9. GENERAL OUTCOMES | OEDEMA                                                                       |  |
| 9. GENERAL OUTCOMES | ORGAN DAMAGE                                                                 |  |

|                     |                                                                       |  |
|---------------------|-----------------------------------------------------------------------|--|
| 9. GENERAL OUTCOMES | ORGAN FUNCTION                                                        |  |
| 9. GENERAL OUTCOMES | ORGAN FUNCTION DAMAGE                                                 |  |
| 9. GENERAL OUTCOMES | ORGANIC SECONDARY OUTCOMES                                            |  |
| 9. GENERAL OUTCOMES | OTHER CONDITION AFTER COVID-19                                        |  |
| 9. GENERAL OUTCOMES | OTHER IMPORTANT SYMPTOMS                                              |  |
| 9. GENERAL OUTCOMES | OTHER NEW SYMPTOMS                                                    |  |
| 9. GENERAL OUTCOMES | OTHER SYMPTOMS                                                        |  |
| 9. GENERAL OUTCOMES | OTHER SYMPTOMS (IF YES, DURATION)                                     |  |
| 9. GENERAL OUTCOMES | OTHER SYMPTOMS OR COMPLAIN                                            |  |
| 9. GENERAL OUTCOMES | PAIN                                                                  |  |
| 9. GENERAL OUTCOMES | PAIN, NOT ELSEWHERE CLASSIFIED                                        |  |
| 9. GENERAL OUTCOMES | PERSISTENT FATIGUE                                                    |  |
| 9. GENERAL OUTCOMES | POOR SLEEP QUALITY                                                    |  |
| 9. GENERAL OUTCOMES | POPULATION BASED DATA ON SPECTRUM AND RECOVERY FROM COVID-19 SYMPTOMS |  |
| 9. GENERAL OUTCOMES | POST-COVID                                                            |  |
| 9. GENERAL OUTCOMES | POSTVIRAL FATIGUE                                                     |  |
| 9. GENERAL OUTCOMES | PREDICTORS OF RECOVERY                                                |  |
| 9. GENERAL OUTCOMES | PRIMARY SYMPTOMS                                                      |  |
| 9. GENERAL OUTCOMES | PROBLEM IN SECOND MONTH                                               |  |
| 9. GENERAL OUTCOMES | PROBLEM IN THIRD MONTH                                                |  |
| 9. GENERAL OUTCOMES | PROBLEM WITHIN 1 MONTH                                                |  |
| 9. GENERAL OUTCOMES | PROBLEMS SWALLOWING OR CHEWING                                        |  |
| 9. GENERAL OUTCOMES | PROBLEMS WITH HANDWRITING                                             |  |
| 9. GENERAL OUTCOMES | RADIOLOGICAL ASSESSMENT                                               |  |
| 9. GENERAL OUTCOMES | RADIOLOGICAL PARAMETERS                                               |  |
| 9. GENERAL OUTCOMES | RECOVERY                                                              |  |

|                     |                                                                          |  |
|---------------------|--------------------------------------------------------------------------|--|
| 9. GENERAL OUTCOMES | RECURRENT PAIN IN THE BODY                                               |  |
| 9. GENERAL OUTCOMES | RESTLESS SLEEP WITH INTERRUPTIONS                                        |  |
| 9. GENERAL OUTCOMES | RISK FACTORS FOR MEDICAL SEQUELAE                                        |  |
| 9. GENERAL OUTCOMES | RISK OF LATE COMPLICATIONS                                               |  |
| 9. GENERAL OUTCOMES | SEVERITY OF SYMPTOMS                                                     |  |
| 9. GENERAL OUTCOMES | SHOCK                                                                    |  |
| 9. GENERAL OUTCOMES | SHOCK / TOXIC SHOCK SYNDROME AFTER COVID-19                              |  |
| 9. GENERAL OUTCOMES | SLEEP DIFFICULTY                                                         |  |
| 9. GENERAL OUTCOMES | SLEEP DIFFICULTY (MILD AND TOLERABLE-MODERATE-SEVERE AND INCAPACITATING) |  |
| 9. GENERAL OUTCOMES | SLEEP DISORDERS                                                          |  |
| 9. GENERAL OUTCOMES | SLEEP DISTURBANCE                                                        |  |
| 9. GENERAL OUTCOMES | SLEEP DISTURBANCE AND QUALITY                                            |  |
| 9. GENERAL OUTCOMES | SLEEP DISTURBANCES                                                       |  |
| 9. GENERAL OUTCOMES | SLEEP THAT IS RESTLESS OR DISTURBED                                      |  |
| 9. GENERAL OUTCOMES | SLEEPING                                                                 |  |
| 9. GENERAL OUTCOMES | SLEEPING DISORDERS                                                       |  |
| 9. GENERAL OUTCOMES | SOME/LOTS OF PAIN/DISCOMFORT                                             |  |
| 9. GENERAL OUTCOMES | SOMNOLENCE                                                               |  |
| 9. GENERAL OUTCOMES | SPEECH DIFFICULTY                                                        |  |
| 9. GENERAL OUTCOMES | SPLENOMEGALY                                                             |  |
| 9. GENERAL OUTCOMES | SYMPTOMS DURING AND AFTER COVID-19 INFECTION                             |  |
| 9. GENERAL OUTCOMES | TEMPERATURE                                                              |  |
| 9. GENERAL OUTCOMES | THE RISK OF LATE COMPLICATIONS                                           |  |
| 9. GENERAL OUTCOMES | TIREDNESS                                                                |  |
| 9. GENERAL OUTCOMES | TIREDNESS                                                                |  |
| 9. GENERAL OUTCOMES | TIREDNESS AFTER SLEEP                                                    |  |



|                            |                                                         |     |
|----------------------------|---------------------------------------------------------|-----|
| 9. GENERAL OUTCOMES        | TOTAL DIFFICULTIES                                      |     |
| 9. GENERAL OUTCOMES        | VOICE CHANGES                                           |     |
| 9. GENERAL OUTCOMES        | WAKE UP AT NIGHT                                        |     |
| 9. GENERAL OUTCOMES        | WAKE UP TIRED                                           |     |
| 9. GENERAL OUTCOMES        | WEAKNESS                                                | 150 |
| 10. HEPATOBILIARY OUTCOMES | ASCITES                                                 |     |
| 10. HEPATOBILIARY OUTCOMES | HEPATOMEGALY                                            |     |
| 10. HEPATOBILIARY OUTCOMES | HEPATOMEGALY AND SPLENOMEGALY                           |     |
| 10. HEPATOBILIARY OUTCOMES | LIVER FUNCTION ABNORMALITY                              |     |
| 10. HEPATOBILIARY OUTCOMES | LIVER/METABOLIC FUNCTION                                | 5   |
| 11. IMMUNE SYSTEM OUTCOMES | ANTIBODY DETERMINATIONS                                 |     |
| 11. IMMUNE SYSTEM OUTCOMES | CD4+ AND CD8+ T CELL LEVELS IN CENTRAL MEMORY           |     |
| 11. IMMUNE SYSTEM OUTCOMES | CD4+ AND CD8+ T CELL LEVELS IN EFFECTOR MEMORY          |     |
| 11. IMMUNE SYSTEM OUTCOMES | COPIES OF SARS-CoV-2                                    |     |
| 11. IMMUNE SYSTEM OUTCOMES | DURATION OF FEVER                                       |     |
| 11. IMMUNE SYSTEM OUTCOMES | ELEVATED LEVELS OF IL6 AND IL1B IN SERUM                |     |
| 11. IMMUNE SYSTEM OUTCOMES | FOT INDICES CORRELATION                                 |     |
| 11. IMMUNE SYSTEM OUTCOMES | HABIT TO EVALUATE THE ANTIBODY                          |     |
| 11. IMMUNE SYSTEM OUTCOMES | HEMOPHAGOCYTOSIS SYNDROME                               |     |
| 11. IMMUNE SYSTEM OUTCOMES | HIGH LEVEL OF IGM                                       |     |
| 11. IMMUNE SYSTEM OUTCOMES | HIGH LEVELS OF IGD-CD27+ MEMORY                         |     |
| 11. IMMUNE SYSTEM OUTCOMES | HIGH LEVELS OF PLASMABLASTS                             |     |
| 11. IMMUNE SYSTEM OUTCOMES | IGA, IGG, IGM, RBD, S1, S2, N-PROTEIN                   |     |
| 11. IMMUNE SYSTEM OUTCOMES | IgG                                                     |     |
| 11. IMMUNE SYSTEM OUTCOMES | IgM                                                     |     |
| 11. IMMUNE SYSTEM OUTCOMES | IGM AND IGG LEVEL AND IF THERE IS IMMUNOLOGICAL CHANGES |     |

|                            |                                                                                       |  |
|----------------------------|---------------------------------------------------------------------------------------|--|
| 11. IMMUNE SYSTEM OUTCOMES | IMMUNE SYSTEM                                                                         |  |
| 11. IMMUNE SYSTEM OUTCOMES | IMMUNOLOGICAL MARKERS                                                                 |  |
| 11. IMMUNE SYSTEM OUTCOMES | IMMUNOLOGICAL PANEL                                                                   |  |
| 11. IMMUNE SYSTEM OUTCOMES | KAWASAKI DISEASE AFTER COVID-19                                                       |  |
| 11. IMMUNE SYSTEM OUTCOMES | KAWASAKIS DISEASE                                                                     |  |
| 11. IMMUNE SYSTEM OUTCOMES | LEVELS OF ANTIBODIES                                                                  |  |
| 11. IMMUNE SYSTEM OUTCOMES | LOW GRADE FEVER                                                                       |  |
| 11. IMMUNE SYSTEM OUTCOMES | LOW-GRADE FEVER                                                                       |  |
| 11. IMMUNE SYSTEM OUTCOMES | LOWER LEVEL OF IGM+ CD27-CD38DIM B-CELL SUBSETS                                       |  |
| 11. IMMUNE SYSTEM OUTCOMES | LOWER LEVEL OF NAÏVE AND UNSWITCHED IGM+ IGD+ B-CELL SUBSETS (CF. TO HEALED CHILDREN) |  |
| 11. IMMUNE SYSTEM OUTCOMES | MIS-C AFTER COVID-19                                                                  |  |
| 11. IMMUNE SYSTEM OUTCOMES | MULTISYSTEM INFLAMMATORY SYNDROME IN CHILDREN (MIS-C)                                 |  |
| 11. IMMUNE SYSTEM OUTCOMES | NEUTRALIZING ANTIBODY                                                                 |  |
| 11. IMMUNE SYSTEM OUTCOMES | NEUTRALIZING ANTIBODY OF SARS-CoV-2                                                   |  |
| 11. IMMUNE SYSTEM OUTCOMES | NON-NEUTRALIZING ANTIBODIES                                                           |  |
| 11. IMMUNE SYSTEM OUTCOMES | NUCLEOCAPSID ANTIBODY                                                                 |  |
| 11. IMMUNE SYSTEM OUTCOMES | OCCASIONAL FEVER                                                                      |  |
| 11. IMMUNE SYSTEM OUTCOMES | PERSISTENT FEVER                                                                      |  |
| 11. IMMUNE SYSTEM OUTCOMES | PIMS                                                                                  |  |
| 11. IMMUNE SYSTEM OUTCOMES | PROBABLE SEPSIS                                                                       |  |
| 11. IMMUNE SYSTEM OUTCOMES | PROLONGED FEVER                                                                       |  |
| 11. IMMUNE SYSTEM OUTCOMES | PROLONGED LOW-GRADE FEVER                                                             |  |
| 11. IMMUNE SYSTEM OUTCOMES | RECURRENT FEBRILE EPISODES                                                            |  |
| 11. IMMUNE SYSTEM OUTCOMES | SARS-CoV-2 ANTIBODIES                                                                 |  |
| 11. IMMUNE SYSTEM OUTCOMES | SARS-CoV-2-SPECIFIC CD4 + AND CD8 + T CELLS                                           |  |
| 11. IMMUNE SYSTEM OUTCOMES | SARS-CoV-2-SPECIFIC IGG POSITIVITY                                                    |  |

|                                        |                                               |    |
|----------------------------------------|-----------------------------------------------|----|
| 11. IMMUNE SYSTEM OUTCOMES             | SEROPOSITIVE PATIENTS                         |    |
| 11. IMMUNE SYSTEM OUTCOMES             | SPIKE PROTEIN ANTIBODY                        |    |
| 11. IMMUNE SYSTEM OUTCOMES             | SWITCHED IGM IGD-B CELLS                      |    |
| 11. IMMUNE SYSTEM OUTCOMES             | VIRUS ANTIBODY                                |    |
| 11. IMMUNE SYSTEM OUTCOMES             | VIRUS SPECIFIC NEUTRALIZING ANTIBODIES        |    |
| 11. IMMUNE SYSTEM OUTCOMES             | VIRUS-NEUTRALIZING ANTIBODIES                 | 48 |
| 12. INFECTION AND INFESTATION OUTCOMES | CHANGE IN CHILD SARS-CoV-2 VACCINATION STATUS |    |
| 12. INFECTION AND INFESTATION OUTCOMES | CULTURE POSITIVE SEPSIS                       |    |
| 12. INFECTION AND INFESTATION OUTCOMES | DURATION OF ANTIBIOTICS                       |    |
| 12. INFECTION AND INFESTATION OUTCOMES | INCIDENCE AND PREVALENCE OF REINFECTION       |    |
| 12. INFECTION AND INFESTATION OUTCOMES | NO REDETECTABLE POSITIVE                      |    |
| 12. INFECTION AND INFESTATION OUTCOMES | POSITIVE/NEGATIVE                             |    |
| 12. INFECTION AND INFESTATION OUTCOMES | RE-DETECTABLE POSITIVE (RP)                   |    |
| 12. INFECTION AND INFESTATION OUTCOMES | REINFECTION                                   |    |
| 12. INFECTION AND INFESTATION OUTCOMES | REINFECTIONS                                  |    |
| 12. INFECTION AND INFESTATION OUTCOMES | RNA LEVELS OF ACE2, TMPRSS2 IN ORGANS         |    |
| 12. INFECTION AND INFESTATION OUTCOMES | SPECIFIC T CELL RESPONSE TO SARS-CoV-2        | 11 |
| 13. INJURY AND POISONING OUTCOMES      | BRUISES                                       |    |

|                                       |                                                    |   |
|---------------------------------------|----------------------------------------------------|---|
| 13. INJURY AND POISONING OUTCOMES     | BURN                                               | 2 |
| 14. METABOLISM AND NUTRITION OUTCOMES | ANOREXIA                                           |   |
| 14. METABOLISM AND NUTRITION OUTCOMES | ANOREXIA (LOSS OF APPETITE)                        |   |
| 14. METABOLISM AND NUTRITION OUTCOMES | BODY WEIGHT CHANGES                                |   |
| 14. METABOLISM AND NUTRITION OUTCOMES | CACHEXIA                                           |   |
| 14. METABOLISM AND NUTRITION OUTCOMES | EATING CHANGES AFTER COVID-19 (LESS/THE SAME/MORE) |   |
| 14. METABOLISM AND NUTRITION OUTCOMES | LACK OF APPETITE                                   |   |
| 14. METABOLISM AND NUTRITION OUTCOMES | LOSS OF APPETITE                                   |   |
| 14. METABOLISM AND NUTRITION OUTCOMES | LOSS OF APPETITE (NO EATING OR OFF THEIR FOOD)     |   |
| 14. METABOLISM AND NUTRITION OUTCOMES | MEALS SKIP                                         |   |
| 14. METABOLISM AND NUTRITION OUTCOMES | NOT FEEDING WELL                                   |   |
| 14. METABOLISM AND NUTRITION OUTCOMES | OVEREATING                                         |   |
| 14. METABOLISM AND NUTRITION OUTCOMES | POOR APPETITE                                      |   |
| 14. METABOLISM AND NUTRITION OUTCOMES | POOR FEEDING/LETHARGY                              |   |
| 14. METABOLISM AND NUTRITION OUTCOMES | WEIGHT                                             |   |

|                                                    |                                    |    |
|----------------------------------------------------|------------------------------------|----|
| 14. METABOLISM AND NUTRITION OUTCOMES              | WEIGHT AFTER COVID-19              |    |
| 14. METABOLISM AND NUTRITION OUTCOMES              | WEIGHT AFTER COVID-19 ILLNESS      |    |
| 14. METABOLISM AND NUTRITION OUTCOMES              | WEIGHT BEFORE COVID-19             |    |
| 14. METABOLISM AND NUTRITION OUTCOMES              | WEIGHT BEFORE COVID-19 ILLNESS     |    |
| 14. METABOLISM AND NUTRITION OUTCOMES              | WEIGHT BEFORE/AFTER                |    |
| 14. METABOLISM AND NUTRITION OUTCOMES              | WEIGHT GAIN/LOSS                   |    |
| 14. METABOLISM AND NUTRITION OUTCOMES              | WEIGHT GAIN/LOSS, EATING DISORDERS |    |
| 14. METABOLISM AND NUTRITION OUTCOMES              | WEIGHT LOSS                        |    |
| 14. METABOLISM AND NUTRITION OUTCOMES              | WEIGHT LOSS OF >5% OF BODY WEIGHT  | 23 |
| 15. MUSCULOSKELETAL AND CONNECTIVE TISSUE OUTCOMES | ARTHRALGIA                         |    |
| 15. MUSCULOSKELETAL AND CONNECTIVE TISSUE OUTCOMES | ARTHRITIDES                        |    |
| 15. MUSCULOSKELETAL AND CONNECTIVE TISSUE OUTCOMES | BACK PAIN                          |    |
| 15. MUSCULOSKELETAL AND CONNECTIVE TISSUE OUTCOMES | ELBOW PAIN                         |    |
| 15. MUSCULOSKELETAL AND CONNECTIVE TISSUE OUTCOMES | JOINT PAIN                         |    |
| 15. MUSCULOSKELETAL AND CONNECTIVE TISSUE OUTCOMES | JOINT PAIN OR SWELLING             |    |

|                                                    |                                                                                |  |
|----------------------------------------------------|--------------------------------------------------------------------------------|--|
| 15. MUSCULOSKELETAL AND CONNECTIVE TISSUE OUTCOMES | JOINT PAINS                                                                    |  |
| 15. MUSCULOSKELETAL AND CONNECTIVE TISSUE OUTCOMES | KNEE PAIN                                                                      |  |
| 15. MUSCULOSKELETAL AND CONNECTIVE TISSUE OUTCOMES | LESS STRENGTH IN MUSCLES                                                       |  |
| 15. MUSCULOSKELETAL AND CONNECTIVE TISSUE OUTCOMES | LIMB PAIN                                                                      |  |
| 15. MUSCULOSKELETAL AND CONNECTIVE TISSUE OUTCOMES | MUSCLE ACHES                                                                   |  |
| 15. MUSCULOSKELETAL AND CONNECTIVE TISSUE OUTCOMES | MUSCLE AND JOINT PAIN                                                          |  |
| 15. MUSCULOSKELETAL AND CONNECTIVE TISSUE OUTCOMES | MUSCLE PAIN                                                                    |  |
| 15. MUSCULOSKELETAL AND CONNECTIVE TISSUE OUTCOMES | MUSCLE SPASMS                                                                  |  |
| 15. MUSCULOSKELETAL AND CONNECTIVE TISSUE OUTCOMES | MUSCLE STRENGTH OF LOWER (ILIOPSOAS (HIP FLEXION) LEFT AND RIGHT LIMBS         |  |
| 15. MUSCULOSKELETAL AND CONNECTIVE TISSUE OUTCOMES | MUSCLE STRENGTH OF QUADRICEPS (KNEE EXTENSION) LEFT AND RIGHT LIMBS            |  |
| 15. MUSCULOSKELETAL AND CONNECTIVE TISSUE OUTCOMES | MUSCLE STRENGTH OF THE UPPER (BICEPS (ELBOW FLEXION) LEFT AND RIGHT LIMBS      |  |
| 15. MUSCULOSKELETAL AND CONNECTIVE TISSUE OUTCOMES | MUSCLE STRENGTH OF TIBIALIS ANTERIOR (ANKLE DORSIFLEXION) LEFT AND RIGHT LIMBS |  |
| 15. MUSCULOSKELETAL AND CONNECTIVE TISSUE OUTCOMES | MUSCLE STRENGTH OF TRICEPS (ELBOW EXTENSION) LEFT AND RIGHT LIMBS              |  |
| 15. MUSCULOSKELETAL AND CONNECTIVE TISSUE OUTCOMES | MUSCLE WEAKNES                                                                 |  |
| 15. MUSCULOSKELETAL AND CONNECTIVE TISSUE OUTCOMES | MUSCLE WEAKNESS                                                                |  |

|                                                                                                    |                                     |    |
|----------------------------------------------------------------------------------------------------|-------------------------------------|----|
| 15. MUSCULOSKELETAL AND CONNECTIVE TISSUE OUTCOMES                                                 | MUSCLE WEAKNESS                     |    |
| 15. MUSCULOSKELETAL AND CONNECTIVE TISSUE OUTCOMES                                                 | MYALGIA                             |    |
| 15. MUSCULOSKELETAL AND CONNECTIVE TISSUE OUTCOMES                                                 | MYALGIAS                            |    |
| 15. MUSCULOSKELETAL AND CONNECTIVE TISSUE OUTCOMES                                                 | NECK/SHOULDER PAIN                  |    |
| 15. MUSCULOSKELETAL AND CONNECTIVE TISSUE OUTCOMES                                                 | PAINS IN LOWER BACK                 |    |
| 15. MUSCULOSKELETAL AND CONNECTIVE TISSUE OUTCOMES                                                 | PERSISTENT MUSCLE PAIN              |    |
| 15. MUSCULOSKELETAL AND CONNECTIVE TISSUE OUTCOMES                                                 | SORENESS OF YOUR MUSCLES            |    |
| 15. MUSCULOSKELETAL AND CONNECTIVE TISSUE OUTCOMES                                                 | STIFFNESS                           |    |
| 15. MUSCULOSKELETAL AND CONNECTIVE TISSUE OUTCOMES                                                 | STRONG MUSCLE PAINS                 |    |
| 15. MUSCULOSKELETAL AND CONNECTIVE TISSUE OUTCOMES                                                 | UNUSUALLY STRONG MUSCLE PAINS       | 31 |
| 16. OUTCOMES RELATING TO NEOPLASMS: BENIGN, MALIGNANT AND UNSPECIFIED (INCLUDING CYSTS AND POLYPS) |                                     |    |
| 17. NERVOUS SYSTEM OUTCOMES                                                                        | AGEUSIA                             |    |
| 17. NERVOUS SYSTEM OUTCOMES                                                                        | ANOSMIA                             |    |
| 17. NERVOUS SYSTEM OUTCOMES                                                                        | ANOSMIA-AGEUSIA OR PAROSMIA/EUOSMIA |    |
| 17. NERVOUS SYSTEM OUTCOMES                                                                        | ANOSMIA/AGEUSIA                     |    |
| 17. NERVOUS SYSTEM OUTCOMES                                                                        | AUTONOMIC DYSFUNCTION               |    |
| 17. NERVOUS SYSTEM OUTCOMES                                                                        | BALANCE PROBLEMS                    |    |

|                             |                                                                   |  |
|-----------------------------|-------------------------------------------------------------------|--|
| 17. NERVOUS SYSTEM OUTCOMES | CEREBRAL HAEMORRHAGE                                              |  |
| 17. NERVOUS SYSTEM OUTCOMES | CHANGED STATE OF CONSCIOUSNESS                                    |  |
| 17. NERVOUS SYSTEM OUTCOMES | CHANGED TASTE                                                     |  |
| 17. NERVOUS SYSTEM OUTCOMES | CHRONIC HEADACHE                                                  |  |
| 17. NERVOUS SYSTEM OUTCOMES | COLLAPSE                                                          |  |
| 17. NERVOUS SYSTEM OUTCOMES | COMA                                                              |  |
| 17. NERVOUS SYSTEM OUTCOMES | CONFUSION                                                         |  |
| 17. NERVOUS SYSTEM OUTCOMES | CONFUSION/BRAIN FOG/TROUBLE FOCUSING ATTENTION                    |  |
| 17. NERVOUS SYSTEM OUTCOMES | CONFUSION/DISORIENTATION/DROWSINESS                               |  |
| 17. NERVOUS SYSTEM OUTCOMES | CONSTANTLY FIDGETING OR SQUIRMING (I AM CONSTANTLY FIDGETING....) |  |
| 17. NERVOUS SYSTEM OUTCOMES | COORDINATION ISSUES                                               |  |
| 17. NERVOUS SYSTEM OUTCOMES | DECREASED SENSE OF SMELL                                          |  |
| 17. NERVOUS SYSTEM OUTCOMES | DECREASED SENSE OF SMELL/TASTE                                    |  |
| 17. NERVOUS SYSTEM OUTCOMES | DECREASED SENSE OF TASTE                                          |  |
| 17. NERVOUS SYSTEM OUTCOMES | DEVELOPMENTAL DELAY                                               |  |
| 17. NERVOUS SYSTEM OUTCOMES | DEVELOPMENTAL REGRESSION                                          |  |
| 17. NERVOUS SYSTEM OUTCOMES | DIFFICULTY SWALLOWING                                             |  |
| 17. NERVOUS SYSTEM OUTCOMES | DISTURBED SMELL                                                   |  |
| 17. NERVOUS SYSTEM OUTCOMES | DISTURBED TASTE                                                   |  |
| 17. NERVOUS SYSTEM OUTCOMES | DIZZINESS                                                         |  |
| 17. NERVOUS SYSTEM OUTCOMES | DIZZINESS ± SYNCOPE                                               |  |
| 17. NERVOUS SYSTEM OUTCOMES | DIZZINESS/ LIGHT HEADEDNESS                                       |  |
| 17. NERVOUS SYSTEM OUTCOMES | DROWSINESS                                                        |  |
| 17. NERVOUS SYSTEM OUTCOMES | DUCHENNE MUSCULAR DYSTROPHY                                       |  |
| 17. NERVOUS SYSTEM OUTCOMES | DYSGEUSIA                                                         |  |
| 17. NERVOUS SYSTEM OUTCOMES | DYSGEUSIA/ANOSMIA                                                 |  |



|                             |                                      |  |
|-----------------------------|--------------------------------------|--|
| 17. NERVOUS SYSTEM OUTCOMES | DYSLEXIA                             |  |
| 17. NERVOUS SYSTEM OUTCOMES | ENCEPHALITIS                         |  |
| 17. NERVOUS SYSTEM OUTCOMES | FACIAL NERVE PARALYSIS               |  |
| 17. NERVOUS SYSTEM OUTCOMES | FACIAL PAIN/PRESSURE                 |  |
| 17. NERVOUS SYSTEM OUTCOMES | FAINING/ BLACKOUTS                   |  |
| 17. NERVOUS SYSTEM OUTCOMES | FAININESS                            |  |
| 17. NERVOUS SYSTEM OUTCOMES | FAININESS OR DIZZINESS               |  |
| 17. NERVOUS SYSTEM OUTCOMES | FEELING OFF-BALANCE OR UNSTEADY      |  |
| 17. NERVOUS SYSTEM OUTCOMES | FEELING TENSE OR KEYED UP            |  |
| 17. NERVOUS SYSTEM OUTCOMES | FEELING WEAK IN PARTS OF YOUR BODY   |  |
| 17. NERVOUS SYSTEM OUTCOMES | GROWTH AND NEURODEVELOPMENT          |  |
| 17. NERVOUS SYSTEM OUTCOMES | GUILLIAN-BARRÉ SYNDROME              |  |
| 17. NERVOUS SYSTEM OUTCOMES | HEADACHE, DIZZINESS                  |  |
| 17. NERVOUS SYSTEM OUTCOMES | HEADACHES                            |  |
| 17. NERVOUS SYSTEM OUTCOMES | HEAVY FEELINGS IN YOUR ARMS OR LEGS  |  |
| 17. NERVOUS SYSTEM OUTCOMES | IMPAIRED BALANCE                     |  |
| 17. NERVOUS SYSTEM OUTCOMES | INCREASED NIGHTMARES OR SLEEPWALKING |  |
| 17. NERVOUS SYSTEM OUTCOMES | ISCHAEMIC STROKE OR TIA              |  |
| 17. NERVOUS SYSTEM OUTCOMES | LOSS OF BALANCE                      |  |
| 17. NERVOUS SYSTEM OUTCOMES | LOSS OF SMELL                        |  |
| 17. NERVOUS SYSTEM OUTCOMES | LOSS OF SMELL/TASTE                  |  |
| 17. NERVOUS SYSTEM OUTCOMES | LOSS OF TASTE                        |  |
| 17. NERVOUS SYSTEM OUTCOMES | LOSS OF TASTE AND/OR SMELL           |  |
| 17. NERVOUS SYSTEM OUTCOMES | MENINGISMUS                          |  |
| 17. NERVOUS SYSTEM OUTCOMES | MENINGITIS                           |  |
| 17. NERVOUS SYSTEM OUTCOMES | MOTOR PROBLEMS                       |  |

|                             |                                                               |  |
|-----------------------------|---------------------------------------------------------------|--|
| 17. NERVOUS SYSTEM OUTCOMES | NEURODEVELOPMENTAL OUTCOME                                    |  |
| 17. NERVOUS SYSTEM OUTCOMES | NEUROLOGIC SEQUELAE                                           |  |
| 17. NERVOUS SYSTEM OUTCOMES | NEUROLOGICAL ABNORMALITIES                                    |  |
| 17. NERVOUS SYSTEM OUTCOMES | NEUROLOGICAL MANIFESTATION OF POST-COVID                      |  |
| 17. NERVOUS SYSTEM OUTCOMES | NEUROPATHIES                                                  |  |
| 17. NERVOUS SYSTEM OUTCOMES | NORMOSMIA                                                     |  |
| 17. NERVOUS SYSTEM OUTCOMES | NUMBNESS OR TINGLING IN PARTS OF YOUR BODY                    |  |
| 17. NERVOUS SYSTEM OUTCOMES | OFTEN COMPLAINS OF HEADACHES... (I GET A LOT OF HEADACHES...) |  |
| 17. NERVOUS SYSTEM OUTCOMES | OLFACTION RECOVERY                                            |  |
| 17. NERVOUS SYSTEM OUTCOMES | OTHER COORDINATION DISORDERS/ATAXIA                           |  |
| 17. NERVOUS SYSTEM OUTCOMES | PARAESTHESIA AND ANESTHESIA                                   |  |
| 17. NERVOUS SYSTEM OUTCOMES | PARESIS                                                       |  |
| 17. NERVOUS SYSTEM OUTCOMES | PARESTHESIA                                                   |  |
| 17. NERVOUS SYSTEM OUTCOMES | PARESTHESIA OF SKIN                                           |  |
| 17. NERVOUS SYSTEM OUTCOMES | PATHOLOGICAL REFLEXES                                         |  |
| 17. NERVOUS SYSTEM OUTCOMES | PINS AND NEEDLES                                              |  |
| 17. NERVOUS SYSTEM OUTCOMES | PROBLEMS WITH BALANCE                                         |  |
| 17. NERVOUS SYSTEM OUTCOMES | REDUCED SMELL                                                 |  |
| 17. NERVOUS SYSTEM OUTCOMES | REDUCED TASTE                                                 |  |
| 17. NERVOUS SYSTEM OUTCOMES | SEIZURE                                                       |  |
| 17. NERVOUS SYSTEM OUTCOMES | SEIZURES                                                      |  |
| 17. NERVOUS SYSTEM OUTCOMES | SEIZURES/FITS                                                 |  |
| 17. NERVOUS SYSTEM OUTCOMES | SENSATION AND PERCEPTION                                      |  |
| 17. NERVOUS SYSTEM OUTCOMES | SENSATION AND PERCEPTION DISORDER                             |  |
| 17. NERVOUS SYSTEM OUTCOMES | SENSORY DISTURBANCES                                          |  |
| 17. NERVOUS SYSTEM OUTCOMES | SEVERE RECURRENT HEADACHES                                    |  |

|                                                  |                                      |     |
|--------------------------------------------------|--------------------------------------|-----|
| 17. NERVOUS SYSTEM OUTCOMES                      | SHAKING                              |     |
| 17. NERVOUS SYSTEM OUTCOMES                      | SLIPS OF THE TONGUE WHEN SPEAKING    |     |
| 17. NERVOUS SYSTEM OUTCOMES                      | SLURRED SPEECH                       |     |
| 17. NERVOUS SYSTEM OUTCOMES                      | SOPOR                                |     |
| 17. NERVOUS SYSTEM OUTCOMES                      | SOPOR/COMA                           |     |
| 17. NERVOUS SYSTEM OUTCOMES                      | STROKE                               |     |
| 17. NERVOUS SYSTEM OUTCOMES                      | SYNCOPE                              |     |
| 17. NERVOUS SYSTEM OUTCOMES                      | TETANY                               |     |
| 17. NERVOUS SYSTEM OUTCOMES                      | TIC EXACERBATION                     |     |
| 17. NERVOUS SYSTEM OUTCOMES                      | TINGLING                             |     |
| 17. NERVOUS SYSTEM OUTCOMES                      | TINGLING FEELING/ 'PINS AND NEEDLES' |     |
| 17. NERVOUS SYSTEM OUTCOMES                      | TINGLING/NUMBNESS IN ARMS/LEGS       |     |
| 17. NERVOUS SYSTEM OUTCOMES                      | TREMBLING                            |     |
| 17. NERVOUS SYSTEM OUTCOMES                      | TREMOR                               |     |
| 17. NERVOUS SYSTEM OUTCOMES                      | TREMOR/SHAKINESS                     |     |
| 17. NERVOUS SYSTEM OUTCOMES                      | TREMULOUSNESS                        |     |
| 17. NERVOUS SYSTEM OUTCOMES                      | TROUBLE FALLING ASLEEP               |     |
| 17. NERVOUS SYSTEM OUTCOMES                      | TWITCHING OF FINGERS/TOES            |     |
| 17. NERVOUS SYSTEM OUTCOMES                      | VERTIGO                              | 103 |
| 18. PREGNANCY, PUERPERIUM AND PERINATAL OUTCOMES |                                      |     |
| 19. RENAL AND URINARY OUTCOMES                   | ACUTE KIDNEY INJURY                  |     |
| 19. RENAL AND URINARY OUTCOMES                   | ANURIA                               |     |
| 19. RENAL AND URINARY OUTCOMES                   | ANURIA/OLIGURIA                      |     |
| 19. RENAL AND URINARY OUTCOMES                   | DYSURIA                              |     |
| 19. RENAL AND URINARY OUTCOMES                   | KIDNEY FAILURE                       |     |
| 19. RENAL AND URINARY OUTCOMES                   | KIDNEY FUNCTION                      |     |

|                                             |                                               |    |
|---------------------------------------------|-----------------------------------------------|----|
| 19. RENAL AND URINARY OUTCOMES              | KIDNEY PROBLEMS AFTER COVID-19                |    |
| 19. RENAL AND URINARY OUTCOMES              | KIDNEY/METABOLIC FUNCTION                     |    |
| 19. RENAL AND URINARY OUTCOMES              | MICROHAEMATURIA                               |    |
| 19. RENAL AND URINARY OUTCOMES              | OLIGURIA                                      |    |
| 19. RENAL AND URINARY OUTCOMES              | OTHER SYMPTOMS OF THE URINARY SYSTEM          |    |
| 19. RENAL AND URINARY OUTCOMES              | POLYURIA                                      |    |
| 19. RENAL AND URINARY OUTCOMES              | PROBLEMS WITH URINATION                       |    |
| 19. RENAL AND URINARY OUTCOMES              | RENAL FAILURE                                 |    |
| 19. RENAL AND URINARY OUTCOMES              | URETHRAL DISCHARGE                            |    |
| 19. RENAL AND URINARY OUTCOMES              | URINARY INCONTINENCE                          |    |
| 19. RENAL AND URINARY OUTCOMES              | URINARY RETENTION                             |    |
| 19. RENAL AND URINARY OUTCOMES              | URINATION PROBLEMS                            |    |
| 19. RENAL AND URINARY OUTCOMES              | URINE                                         | 19 |
| 20. REPRODUCTIVE SYSTEM AND BREAST OUTCOMES | CHANGE IN MENSTRUATION                        |    |
| 20. REPRODUCTIVE SYSTEM AND BREAST OUTCOMES | CHANGES IN MENSTRUATION                       |    |
| 20. REPRODUCTIVE SYSTEM AND BREAST OUTCOMES | DYSMENORRHEA                                  |    |
| 20. REPRODUCTIVE SYSTEM AND BREAST OUTCOMES | MENSTRUAL DISTURBANCES                        |    |
| 20. REPRODUCTIVE SYSTEM AND BREAST OUTCOMES | PATHOLOGICAL FINDINGS FROM MALE GENITAL TRACT | 5  |
| 21. PSYCHIATRIC OUTCOMES                    | ABILITY TO MAKE UP OWN MIND ABOUT THINGS      |    |
| 21. PSYCHIATRIC OUTCOMES                    | ADAPTIVE BEHAVIOR SCORE                       |    |
| 21. PSYCHIATRIC OUTCOMES                    | ADJUSTMENT DISORDER                           |    |
| 21. PSYCHIATRIC OUTCOMES                    | ANXIETY                                       |    |
| 21. PSYCHIATRIC OUTCOMES                    | ANXIETY DISORDER                              |    |

|                          |                                                                   |  |
|--------------------------|-------------------------------------------------------------------|--|
| 21. PSYCHIATRIC OUTCOMES | ANXIETY OR DEPRESSION                                             |  |
| 21. PSYCHIATRIC OUTCOMES | ANXIETY/DEPRESSION                                                |  |
| 21. PSYCHIATRIC OUTCOMES | APATHY, SAD FEELING                                               |  |
| 21. PSYCHIATRIC OUTCOMES | AWAKENING IN THE EARLY MORNING                                    |  |
| 21. PSYCHIATRIC OUTCOMES | BEHAVIORAL SYMPTOMS                                               |  |
| 21. PSYCHIATRIC OUTCOMES | BEHAVIOUR                                                         |  |
| 21. PSYCHIATRIC OUTCOMES | BLAMING YOURSELF FOR THINGS                                       |  |
| 21. PSYCHIATRIC OUTCOMES | CONCENTRATION IMPAIRMENT                                          |  |
| 21. PSYCHIATRIC OUTCOMES | CONSTANTLY CRYING                                                 |  |
| 21. PSYCHIATRIC OUTCOMES | CRYING EASILY                                                     |  |
| 21. PSYCHIATRIC OUTCOMES | DEALING WITH PROBLEMS WELL                                        |  |
| 21. PSYCHIATRIC OUTCOMES | DEPRESSED MOOD                                                    |  |
| 21. PSYCHIATRIC OUTCOMES | DEPRESSION                                                        |  |
| 21. PSYCHIATRIC OUTCOMES | DEPRESSIVE SYMPTOMS                                               |  |
| 21. PSYCHIATRIC OUTCOMES | DIFFICULTY MAKING DECISIONS                                       |  |
| 21. PSYCHIATRIC OUTCOMES | EASILY DISTRACTED, CONCENTRATION WANDERS (I AM EASILY DISTRACTED) |  |
| 21. PSYCHIATRIC OUTCOMES | EMBARRASSED                                                       |  |
| 21. PSYCHIATRIC OUTCOMES | EMOTIONAL AND BEHAVIORAL DISORDER                                 |  |
| 21. PSYCHIATRIC OUTCOMES | EMOTIONAL AND MENTAL HEALTH                                       |  |
| 21. PSYCHIATRIC OUTCOMES | EMOTIONALITY                                                      |  |
| 21. PSYCHIATRIC OUTCOMES | EMOTIONS                                                          |  |
| 21. PSYCHIATRIC OUTCOMES | EUPHORIA                                                          |  |
| 21. PSYCHIATRIC OUTCOMES | EXCESSIVE CRYING                                                  |  |
| 21. PSYCHIATRIC OUTCOMES | FEELING AFRAID IN OPEN SPACES OR ON THE STREETS                   |  |
| 21. PSYCHIATRIC OUTCOMES | FEELING AFRAID TO GO OUT OF YOUR HOUSE ALONE                      |  |
| 21. PSYCHIATRIC OUTCOMES | FEELING AFRAID TO TRAVEL ON BUSES, SUBWAYS, TRAINS                |  |

|                          |                                                                |  |
|--------------------------|----------------------------------------------------------------|--|
| 21. PSYCHIATRIC OUTCOMES | FEELING AFRAID YOU WILL FAINT IN PUBLIC                        |  |
| 21. PSYCHIATRIC OUTCOMES | FEELING BLOCKED IN GETTING THINGS DONE                         |  |
| 21. PSYCHIATRIC OUTCOMES | FEELING BLUE                                                   |  |
| 21. PSYCHIATRIC OUTCOMES | FEELING CRITICAL OF OTHERS                                     |  |
| 21. PSYCHIATRIC OUTCOMES | FEELING EASILY ANNOYED OR IRRITATED                            |  |
| 21. PSYCHIATRIC OUTCOMES | FEELING EVERYTHING IS AN EFFORT                                |  |
| 21. PSYCHIATRIC OUTCOMES | FEELING FEARFUL                                                |  |
| 21. PSYCHIATRIC OUTCOMES | FEELING HOPELESS ABOUT THE FUTURE                              |  |
| 21. PSYCHIATRIC OUTCOMES | FEELING INFERIOR TO OTHERS                                     |  |
| 21. PSYCHIATRIC OUTCOMES | FEELING LONELY                                                 |  |
| 21. PSYCHIATRIC OUTCOMES | FEELING LONELY EVEN WHEN YOU ARE WITH PEOPLE                   |  |
| 21. PSYCHIATRIC OUTCOMES | FEELING LOW IN ENERGY OR SLOWED DOWN                           |  |
| 21. PSYCHIATRIC OUTCOMES | FEELING NERVOUS WHEN YOU ARE LEFT ALONE                        |  |
| 21. PSYCHIATRIC OUTCOMES | FEELING NO INTEREST IN THINGS                                  |  |
| 21. PSYCHIATRIC OUTCOMES | FEELING OF BEING TRAPPED OR CAUGHT                             |  |
| 21. PSYCHIATRIC OUTCOMES | FEELING OTHERS ARE TO BLAME FOR MOST OF YOUR TROUBLES          |  |
| 21. PSYCHIATRIC OUTCOMES | FEELING OTHERS DO NOT UNDERSTAND YOU OR ARE UNSYMPATHETIC      |  |
| 21. PSYCHIATRIC OUTCOMES | FEELING PUSHED TO GET THINGS DONE                              |  |
| 21. PSYCHIATRIC OUTCOMES | FEELING SHY OR UNEASY WITH THE OPPOSITE SEX                    |  |
| 21. PSYCHIATRIC OUTCOMES | FEELING SO RESTLESS YOU COULDN'T SIT STILL                     |  |
| 21. PSYCHIATRIC OUTCOMES | FEELING THAT FAMILIAR THINGS ARE STRANGE OR UNREAL             |  |
| 21. PSYCHIATRIC OUTCOMES | FEELING THAT MOST PEOPLE CANNOT BE TRUSTED                     |  |
| 21. PSYCHIATRIC OUTCOMES | FEELING THAT PEOPLE ARE UNFRIENDLY OR DISLIKE YOU              |  |
| 21. PSYCHIATRIC OUTCOMES | FEELING THAT PEOPLE WILL TAKE ADVANTAGE OF YOU IF YOU LET THEM |  |
| 21. PSYCHIATRIC OUTCOMES | FEELING THAT YOU ARE WATCHED OR TALKED ABOUT BY OTHERS         |  |
| 21. PSYCHIATRIC OUTCOMES | FEELING UNCOMFORTABLE ABOUT EATING OR DRINKING IN PUBLIC       |  |

|                          |                                                                                 |  |
|--------------------------|---------------------------------------------------------------------------------|--|
| 21. PSYCHIATRIC OUTCOMES | FEELING UNEASY IN CROWDS, SUCH AS SHOPPING OR AT A MOVIE                        |  |
| 21. PSYCHIATRIC OUTCOMES | FEELING UNEASY WHEN PEOPLE ARE WATCHING OR TALKING ABOUT YOU                    |  |
| 21. PSYCHIATRIC OUTCOMES | FEELING USEFUL                                                                  |  |
| 21. PSYCHIATRIC OUTCOMES | FEELING VERY SELF-CONSCIOUS WITH OTHERS                                         |  |
| 21. PSYCHIATRIC OUTCOMES | FEELINGS OF GUILT                                                               |  |
| 21. PSYCHIATRIC OUTCOMES | FEELINGS OF WORTHLESSNESS                                                       |  |
| 21. PSYCHIATRIC OUTCOMES | FLOPPY OR DIFFICULTY ROUSING                                                    |  |
| 21. PSYCHIATRIC OUTCOMES | FRUSTRATED/RESTLESS/IRRITABLE                                                   |  |
| 21. PSYCHIATRIC OUTCOMES | GETTING INTO FREQUENT ARGUMENTS                                                 |  |
| 21. PSYCHIATRIC OUTCOMES | HALLUCINATIONS                                                                  |  |
| 21. PSYCHIATRIC OUTCOMES | HAVING DIFFICULTY SLEEPING AT NIGHT/GETTING TO SLEEP                            |  |
| 21. PSYCHIATRIC OUTCOMES | HAVING IDEAS OR BELIEFS THAT OTHERS DO NOT SHARE                                |  |
| 21. PSYCHIATRIC OUTCOMES | HAVING THOUGHTS ABOUT SEX THAT BOTHER YOU A LOT                                 |  |
| 21. PSYCHIATRIC OUTCOMES | HAVING THOUGHTS THAT ARE NOT YOUR OWN                                           |  |
| 21. PSYCHIATRIC OUTCOMES | HAVING TO AVOID CERTAIN THINGS, PLACES, OR ACTIVITIES BECAUSE THEY FRIGHTEN YOU |  |
| 21. PSYCHIATRIC OUTCOMES | HAVING TO CHECK AND DOUBLE-CHECK WHAT YOU DO                                    |  |
| 21. PSYCHIATRIC OUTCOMES | HAVING TO DO THINGS VERY SLOWLY TO INSURE CORRECTNESS                           |  |
| 21. PSYCHIATRIC OUTCOMES | HAVING TO REPEAT THE SAME ACTIONS SUCH AS TOUCHING, COUNTING, WASHING           |  |
| 21. PSYCHIATRIC OUTCOMES | HAVING TO SLEEP UPRIGHT                                                         |  |
| 21. PSYCHIATRIC OUTCOMES | HAVING URGES TO BEAT, INJURE, OR HARM SOMEONE                                   |  |
| 21. PSYCHIATRIC OUTCOMES | HAVING URGES TO BREAK OR SMASH THINGS                                           |  |
| 21. PSYCHIATRIC OUTCOMES | HEARING VOICES THAT OTHER PEOPLE DO NOT HEAR                                    |  |
| 21. PSYCHIATRIC OUTCOMES | IDEAS OF PERSECUTION                                                            |  |
| 21. PSYCHIATRIC OUTCOMES | INCREASED AGGRESSIVENESS                                                        |  |
| 21. PSYCHIATRIC OUTCOMES | INCREASED ANXIETY                                                               |  |
| 21. PSYCHIATRIC OUTCOMES | INCREASED MOOD SWINGS                                                           |  |

|                          |                                                                      |  |
|--------------------------|----------------------------------------------------------------------|--|
| 21. PSYCHIATRIC OUTCOMES | IRRITABILITY                                                         |  |
| 21. PSYCHIATRIC OUTCOMES | IRRITABLE                                                            |  |
| 21. PSYCHIATRIC OUTCOMES | LETHARGY                                                             |  |
| 21. PSYCHIATRIC OUTCOMES | LONELINESS                                                           |  |
| 21. PSYCHIATRIC OUTCOMES | LOSS OF SEXUAL INTEREST OR PLEASURE                                  |  |
| 21. PSYCHIATRIC OUTCOMES | MANY FEARS, EASILY SCARED (I HAVE MANY FEARS)                        |  |
| 21. PSYCHIATRIC OUTCOMES | MANY WORRIES (I WORRY A LOT)                                         |  |
| 21. PSYCHIATRIC OUTCOMES | MOOD AND BEHAVIOUR CHANGES                                           |  |
| 21. PSYCHIATRIC OUTCOMES | MOOD CHANGES                                                         |  |
| 21. PSYCHIATRIC OUTCOMES | MOOD DISORDER                                                        |  |
| 21. PSYCHIATRIC OUTCOMES | MOOD SWINGS                                                          |  |
| 21. PSYCHIATRIC OUTCOMES | NERVOUS OR CLINGY IN NEW SITUATIONS (I AM NERVOUS IN NEW SITUATIONS) |  |
| 21. PSYCHIATRIC OUTCOMES | NERVOUSNESS OR SHAKINESS INSIDE                                      |  |
| 21. PSYCHIATRIC OUTCOMES | NEURASTHENIA                                                         |  |
| 21. PSYCHIATRIC OUTCOMES | NEVER FEELING CLOSE TO ANOTHER PERSON                                |  |
| 21. PSYCHIATRIC OUTCOMES | NUMBER OF PSYCHOLOGIC CHANGES                                        |  |
| 21. PSYCHIATRIC OUTCOMES | OBSESSIVE-COMPULSIVE SYMPTOMS                                        |  |
| 21. PSYCHIATRIC OUTCOMES | OBSESSIVE-COMPULSIVE DISORDER                                        |  |
| 21. PSYCHIATRIC OUTCOMES | OFTEN UNHAPPY, DOWNHEARTED (I AM OFTEN UNHAPPY)                      |  |
| 21. PSYCHIATRIC OUTCOMES | OTHER PEOPLE BEING AWARE OF YOUR PRIVATE THOUGHTS                    |  |
| 21. PSYCHIATRIC OUTCOMES | OTHERS NOT GIVING YOU PROPER CREDIT FOR YOUR ACHIEVEMENTS            |  |
| 21. PSYCHIATRIC OUTCOMES | PERSONALITY                                                          |  |
| 21. PSYCHIATRIC OUTCOMES | PROBLEMS STARTING THINGS                                             |  |
| 21. PSYCHIATRIC OUTCOMES | PSYCHOLOGIC STATUS                                                   |  |
| 21. PSYCHIATRIC OUTCOMES | PSYCHOLOGICAL/PSYCHIATRIC SYMPTOMS                                   |  |
| 21. PSYCHIATRIC OUTCOMES | PSYCHOSIS                                                            |  |



|                                                    |                                                                         |     |
|----------------------------------------------------|-------------------------------------------------------------------------|-----|
| 21. PSYCHIATRIC OUTCOMES                           | RESTLESS, OVERACTIVE (I AM RESTLESS)                                    |     |
| 21. PSYCHIATRIC OUTCOMES                           | SAD                                                                     |     |
| 21. PSYCHIATRIC OUTCOMES                           | SADNESS                                                                 |     |
| 21. PSYCHIATRIC OUTCOMES                           | SEES TASKS THROUGH TO THE END (I FINISH THE WORK I AM DOING)            |     |
| 21. PSYCHIATRIC OUTCOMES                           | SHOUTING OR THROWING THINGS                                             |     |
| 21. PSYCHIATRIC OUTCOMES                           | SOMATIZATION DISORDER                                                   |     |
| 21. PSYCHIATRIC OUTCOMES                           | SPELLS OF TERROR OR PANIC                                               |     |
| 21. PSYCHIATRIC OUTCOMES                           | STEALS FROM HOME, SCHOOL OR ELSEWHERE (I TAKE THINGS THAT ARE NOT MINE) |     |
| 21. PSYCHIATRIC OUTCOMES                           | SUDDENLY SCARED FOR NO REASON                                           |     |
| 21. PSYCHIATRIC OUTCOMES                           | SUICIDAL IDEATION                                                       |     |
| 21. PSYCHIATRIC OUTCOMES                           | TEMPER OUTBURSTS THAT YOU COULD NOT CONTROL                             |     |
| 21. PSYCHIATRIC OUTCOMES                           | TEMPER TANTRUMS/HOT TEMPER (GET VERY ANGRY)                             |     |
| 21. PSYCHIATRIC OUTCOMES                           | THE IDEA THAT SOMEONE ELSE CAN CONTROL YOUR THOUGHTS                    |     |
| 21. PSYCHIATRIC OUTCOMES                           | THE IDEA THAT SOMETHING IS WRONG WITH YOUR MIND                         |     |
| 21. PSYCHIATRIC OUTCOMES                           | THE IDEA THAT SOMETHING SERIOUS IS WRONG WITH YOUR BODY                 |     |
| 21. PSYCHIATRIC OUTCOMES                           | THE IDEA THAT YOU SHOULD BE PUNISHED FOR YOUR SINS                      |     |
| 21. PSYCHIATRIC OUTCOMES                           | THINKS THINGS OUT BEFORE ACTING (I THINK BEFORE I DO THINGS)            |     |
| 21. PSYCHIATRIC OUTCOMES                           | THOUGHTS OF DEATH OR DYING                                              |     |
| 21. PSYCHIATRIC OUTCOMES                           | THOUGHTS OF ENDING YOUR LIFE                                            |     |
| 21. PSYCHIATRIC OUTCOMES                           | TROUBLE GETTING YOUR BREATH                                             |     |
| 21. PSYCHIATRIC OUTCOMES                           | UNWANTED THOUGHTS, WORDS/IDEAS THAT WON'T LEAVE YOUR MIND               |     |
| 21. PSYCHIATRIC OUTCOMES                           | UPSET OR DISTRESS ABOUT CURRENT SYMPTOMS                                |     |
| 21. PSYCHIATRIC OUTCOMES                           | WORRIED ABOUT SLOPPINESS OR CARELESSNESS                                |     |
| 21. PSYCHIATRIC OUTCOMES                           | WORRYING TOO MUCH ABOUT THINGS                                          |     |
| 21. PSYCHIATRIC OUTCOMES                           | YOUR FEELINGS BEING EASILY HURT                                         | 134 |
| 22. RESPIRATORY, THORACIC AND MEDIASTINAL OUTCOMES | ABNORMAL 6MWT (6 - MINUTE WALK TEST)                                    |     |

|                                                    |                                                             |  |
|----------------------------------------------------|-------------------------------------------------------------|--|
| 22. RESPIRATORY, THORACIC AND MEDIASTINAL OUTCOMES | ABNORMAL AUSCULTATORY FINDINGS: DECREASED BREATH SOUNDS     |  |
| 22. RESPIRATORY, THORACIC AND MEDIASTINAL OUTCOMES | ABNORMAL AUSCULTATORY FINDINGS: INTERMITTENT WHEEZING       |  |
| 22. RESPIRATORY, THORACIC AND MEDIASTINAL OUTCOMES | ABNORMAL CHEST RADIOGRAPH                                   |  |
| 22. RESPIRATORY, THORACIC AND MEDIASTINAL OUTCOMES | ABNORMAL LUNG FUNCTION                                      |  |
| 22. RESPIRATORY, THORACIC AND MEDIASTINAL OUTCOMES | ABNORMAL PULMONARY FUNCTION TESTS                           |  |
| 22. RESPIRATORY, THORACIC AND MEDIASTINAL OUTCOMES | ABNORMAL RESPIRATORY FUNCTION                               |  |
| 22. RESPIRATORY, THORACIC AND MEDIASTINAL OUTCOMES | ABNORMAL SPIROMETRY                                         |  |
| 22. RESPIRATORY, THORACIC AND MEDIASTINAL OUTCOMES | ABNORMAL TLCO - LUNG DIFFUSING CAPACITY FOR CARBON MONOXIDE |  |
| 22. RESPIRATORY, THORACIC AND MEDIASTINAL OUTCOMES | ACUTE RESPIRATORY DISTRESS SYNDROME                         |  |
| 22. RESPIRATORY, THORACIC AND MEDIASTINAL OUTCOMES | ACUTE UPPER RESPIRATORY TRACT INFECTION (AURI)              |  |
| 22. RESPIRATORY, THORACIC AND MEDIASTINAL OUTCOMES | BREATHLESSNESS                                              |  |
| 22. RESPIRATORY, THORACIC AND MEDIASTINAL OUTCOMES | BRONCHIAL ASTHMA                                            |  |
| 22. RESPIRATORY, THORACIC AND MEDIASTINAL OUTCOMES | BRONCHIOLITIS                                               |  |
| 22. RESPIRATORY, THORACIC AND MEDIASTINAL OUTCOMES | BRONCHO-RESPONSIVENESS                                      |  |
| 22. RESPIRATORY, THORACIC AND MEDIASTINAL OUTCOMES | CHANGES IN LUNG VENTILATION                                 |  |

|                                                    |                                                                                                                             |  |
|----------------------------------------------------|-----------------------------------------------------------------------------------------------------------------------------|--|
| 22. RESPIRATORY, THORACIC AND MEDIASTINAL OUTCOMES | CHANGES IN OTHER LUNG FUNCTIONS                                                                                             |  |
| 22. RESPIRATORY, THORACIC AND MEDIASTINAL OUTCOMES | CHARACTERISTICS OF RESISTANCE AND REACTANCE OF LUNG AIRWAYS                                                                 |  |
| 22. RESPIRATORY, THORACIC AND MEDIASTINAL OUTCOMES | CHEST PAIN                                                                                                                  |  |
| 22. RESPIRATORY, THORACIC AND MEDIASTINAL OUTCOMES | CHEST PAIN/TIGHTNESS                                                                                                        |  |
| 22. RESPIRATORY, THORACIC AND MEDIASTINAL OUTCOMES | CHEST RADIOGRAPH CHANGES                                                                                                    |  |
| 22. RESPIRATORY, THORACIC AND MEDIASTINAL OUTCOMES | CHEST TIGHTNESS/PAIN                                                                                                        |  |
| 22. RESPIRATORY, THORACIC AND MEDIASTINAL OUTCOMES | CHRONIC COUGH                                                                                                               |  |
| 22. RESPIRATORY, THORACIC AND MEDIASTINAL OUTCOMES | COMBINED DEFECTS                                                                                                            |  |
| 22. RESPIRATORY, THORACIC AND MEDIASTINAL OUTCOMES | CONGESTED NOSE                                                                                                              |  |
| 22. RESPIRATORY, THORACIC AND MEDIASTINAL OUTCOMES | CONGESTION                                                                                                                  |  |
| 22. RESPIRATORY, THORACIC AND MEDIASTINAL OUTCOMES | CONSOLIDATION                                                                                                               |  |
| 22. RESPIRATORY, THORACIC AND MEDIASTINAL OUTCOMES | CORRELATION OF THE SEVERITY OF THE RESPIRATORY INVOLVEMENT DURING THE ACUTE INFECTION WITH THE LONG TERM RESPIRATORY STATUS |  |
| 22. RESPIRATORY, THORACIC AND MEDIASTINAL OUTCOMES | COUGH                                                                                                                       |  |
| 22. RESPIRATORY, THORACIC AND MEDIASTINAL OUTCOMES | COUGH WITH EXPECTORATION                                                                                                    |  |
| 22. RESPIRATORY, THORACIC AND MEDIASTINAL OUTCOMES | COUGH/DYSPNEA/CHEST TIGHTNESS                                                                                               |  |

|                                                    |                                                                            |  |
|----------------------------------------------------|----------------------------------------------------------------------------|--|
| 22. RESPIRATORY, THORACIC AND MEDIASTINAL OUTCOMES | COUGHING WHEN LYING DOWN                                                   |  |
| 22. RESPIRATORY, THORACIC AND MEDIASTINAL OUTCOMES | CT ABNORMALITIES                                                           |  |
| 22. RESPIRATORY, THORACIC AND MEDIASTINAL OUTCOMES | DAMAGE TO THE LUNGS                                                        |  |
| 22. RESPIRATORY, THORACIC AND MEDIASTINAL OUTCOMES | DIFFICULTIES BREATHING                                                     |  |
| 22. RESPIRATORY, THORACIC AND MEDIASTINAL OUTCOMES | DIFFICULTY BREATHING                                                       |  |
| 22. RESPIRATORY, THORACIC AND MEDIASTINAL OUTCOMES | DIFFICULTY BREATHING /CHEST TIGHTNESS                                      |  |
| 22. RESPIRATORY, THORACIC AND MEDIASTINAL OUTCOMES | DRY COUGH                                                                  |  |
| 22. RESPIRATORY, THORACIC AND MEDIASTINAL OUTCOMES | DURATION OF OXYGEN                                                         |  |
| 22. RESPIRATORY, THORACIC AND MEDIASTINAL OUTCOMES | DYSPNEA                                                                    |  |
| 22. RESPIRATORY, THORACIC AND MEDIASTINAL OUTCOMES | DYSPNEA AT REST                                                            |  |
| 22. RESPIRATORY, THORACIC AND MEDIASTINAL OUTCOMES | EARLY EFFECTS OF SEVERE ACUTE RESPIRATORY SYNDROME ON LUNG FUNCTION        |  |
| 22. RESPIRATORY, THORACIC AND MEDIASTINAL OUTCOMES | EARLY EFFECTS OF SEVERE ACUTE RESPIRATORY SYNDROME ON RESPIRATORY SYMPTOMS |  |
| 22. RESPIRATORY, THORACIC AND MEDIASTINAL OUTCOMES | ELEVATED RV/TLC ABOVE 30%                                                  |  |
| 22. RESPIRATORY, THORACIC AND MEDIASTINAL OUTCOMES | EMPHYSEMA/PULMONARY BULLA                                                  |  |
| 22. RESPIRATORY, THORACIC AND MEDIASTINAL OUTCOMES | ENHANCED LUNG MARKING                                                      |  |

|                                                    |                                                   |  |
|----------------------------------------------------|---------------------------------------------------|--|
| 22. RESPIRATORY, THORACIC AND MEDIASTINAL OUTCOMES | EXCESS SPUTUM                                     |  |
| 22. RESPIRATORY, THORACIC AND MEDIASTINAL OUTCOMES | EXERTIONAL DYSPNEA                                |  |
| 22. RESPIRATORY, THORACIC AND MEDIASTINAL OUTCOMES | EXHALED BREATH PROFILES                           |  |
| 22. RESPIRATORY, THORACIC AND MEDIASTINAL OUTCOMES | EXPECTORATION                                     |  |
| 22. RESPIRATORY, THORACIC AND MEDIASTINAL OUTCOMES | FCV                                               |  |
| 22. RESPIRATORY, THORACIC AND MEDIASTINAL OUTCOMES | FEF 25-75%                                        |  |
| 22. RESPIRATORY, THORACIC AND MEDIASTINAL OUTCOMES | FEV1                                              |  |
| 22. RESPIRATORY, THORACIC AND MEDIASTINAL OUTCOMES | FEV1/FVC                                          |  |
| 22. RESPIRATORY, THORACIC AND MEDIASTINAL OUTCOMES | FITS OF COUGHING                                  |  |
| 22. RESPIRATORY, THORACIC AND MEDIASTINAL OUTCOMES | GROUND-GLASS OPACITY                              |  |
| 22. RESPIRATORY, THORACIC AND MEDIASTINAL OUTCOMES | HOARSE VOICE                                      |  |
| 22. RESPIRATORY, THORACIC AND MEDIASTINAL OUTCOMES | HOARSENESS                                        |  |
| 22. RESPIRATORY, THORACIC AND MEDIASTINAL OUTCOMES | HYALINE MEMBRANE DISEASE                          |  |
| 22. RESPIRATORY, THORACIC AND MEDIASTINAL OUTCOMES | HYPOXEMIA                                         |  |
| 22. RESPIRATORY, THORACIC AND MEDIASTINAL OUTCOMES | IMPACT OF DYSPNEA SYMPTOMS ON SPECIFIC ACTIVITIES |  |

|                                                    |                                                                           |  |
|----------------------------------------------------|---------------------------------------------------------------------------|--|
| 22. RESPIRATORY, THORACIC AND MEDIASTINAL OUTCOMES | IMPAIRED PULMONARY DIFFUSION FUNCTION                                     |  |
| 22. RESPIRATORY, THORACIC AND MEDIASTINAL OUTCOMES | INFLAMMATION ABSORPTION                                                   |  |
| 22. RESPIRATORY, THORACIC AND MEDIASTINAL OUTCOMES | INTERSTITIAL B-LINES PATTERN                                              |  |
| 22. RESPIRATORY, THORACIC AND MEDIASTINAL OUTCOMES | LATE EFFECTS OF SEVERE ACUTE RESPIRATORY SYNDROME ON LUNG FUNCTION        |  |
| 22. RESPIRATORY, THORACIC AND MEDIASTINAL OUTCOMES | LATE EFFECTS OF SEVERE ACUTE RESPIRATORY SYNDROME ON RESPIRATORY SYMPTOMS |  |
| 22. RESPIRATORY, THORACIC AND MEDIASTINAL OUTCOMES | LONG TERM SYMPTOMS                                                        |  |
| 22. RESPIRATORY, THORACIC AND MEDIASTINAL OUTCOMES | LUNG CAPACITY                                                             |  |
| 22. RESPIRATORY, THORACIC AND MEDIASTINAL OUTCOMES | LUNG FUNCTION                                                             |  |
| 22. RESPIRATORY, THORACIC AND MEDIASTINAL OUTCOMES | LUNG LESIONS                                                              |  |
| 22. RESPIRATORY, THORACIC AND MEDIASTINAL OUTCOMES | LUNG TISSUE REPAIR                                                        |  |
| 22. RESPIRATORY, THORACIC AND MEDIASTINAL OUTCOMES | MEAN FVL CORRELATION                                                      |  |
| 22. RESPIRATORY, THORACIC AND MEDIASTINAL OUTCOMES | MECHANICAL VENTILATION                                                    |  |
| 22. RESPIRATORY, THORACIC AND MEDIASTINAL OUTCOMES | MECONIUM ASPIRATION SYNDROME                                              |  |
| 22. RESPIRATORY, THORACIC AND MEDIASTINAL OUTCOMES | MILD PNEUMONIA                                                            |  |
| 22. RESPIRATORY, THORACIC AND MEDIASTINAL OUTCOMES | MILD SHORTNESS OF BREATH                                                  |  |

|                                                    |                                          |  |
|----------------------------------------------------|------------------------------------------|--|
| 22. RESPIRATORY, THORACIC AND MEDIASTINAL OUTCOMES | MILD-TO-MODERATE OBSTRUCTIVE DISEASE     |  |
| 22. RESPIRATORY, THORACIC AND MEDIASTINAL OUTCOMES | MODERATE OBSTRUCTIVE DISEASE             |  |
| 22. RESPIRATORY, THORACIC AND MEDIASTINAL OUTCOMES | MORPHOLOGICAL CHANGES IN THE LUNG        |  |
| 22. RESPIRATORY, THORACIC AND MEDIASTINAL OUTCOMES | MORPHOLOGICAL CHANGES OF LUNG PARENCHYMA |  |
| 22. RESPIRATORY, THORACIC AND MEDIASTINAL OUTCOMES | NASAL BLOCKAGE                           |  |
| 22. RESPIRATORY, THORACIC AND MEDIASTINAL OUTCOMES | NASAL CONGESTION                         |  |
| 22. RESPIRATORY, THORACIC AND MEDIASTINAL OUTCOMES | NASAL CONGESTION / RHINORRHEA            |  |
| 22. RESPIRATORY, THORACIC AND MEDIASTINAL OUTCOMES | NASAL CONGESTION/ RHINORRHEA             |  |
| 22. RESPIRATORY, THORACIC AND MEDIASTINAL OUTCOMES | NASAL CONGESTION/ RHINORRHOEA            |  |
| 22. RESPIRATORY, THORACIC AND MEDIASTINAL OUTCOMES | NASAL DISCHARGE                          |  |
| 22. RESPIRATORY, THORACIC AND MEDIASTINAL OUTCOMES | NEED TO BLOW NOSE                        |  |
| 22. RESPIRATORY, THORACIC AND MEDIASTINAL OUTCOMES | NO OBVIOUS ABNORMALITY                   |  |
| 22. RESPIRATORY, THORACIC AND MEDIASTINAL OUTCOMES | NODULAR SHADOWING                        |  |
| 22. RESPIRATORY, THORACIC AND MEDIASTINAL OUTCOMES | NON-SPECIFIC INTERSTITIAL PNEUMONIA      |  |
| 22. RESPIRATORY, THORACIC AND MEDIASTINAL OUTCOMES | NORMAL/ABNORMAL                          |  |

|                                                    |                                         |  |
|----------------------------------------------------|-----------------------------------------|--|
| 22. RESPIRATORY, THORACIC AND MEDIASTINAL OUTCOMES | NORMALIZATION                           |  |
| 22. RESPIRATORY, THORACIC AND MEDIASTINAL OUTCOMES | NOSE SYMPTOMS                           |  |
| 22. RESPIRATORY, THORACIC AND MEDIASTINAL OUTCOMES | OBSTRUCTIVE OR RESTRICTIVE DEFECT       |  |
| 22. RESPIRATORY, THORACIC AND MEDIASTINAL OUTCOMES | OBSTRUCTIVE SLEEP APNEA                 |  |
| 22. RESPIRATORY, THORACIC AND MEDIASTINAL OUTCOMES | OBSTRUCTIVE VENTILATORY DEFECTS         |  |
| 22. RESPIRATORY, THORACIC AND MEDIASTINAL OUTCOMES | ONGOING SUPPLEMENTAL OXYGEN REQUIREMENT |  |
| 22. RESPIRATORY, THORACIC AND MEDIASTINAL OUTCOMES | OTHER PULMONARY ABNORMALITIES           |  |
| 22. RESPIRATORY, THORACIC AND MEDIASTINAL OUTCOMES | PAIN ON BREATHING                       |  |
| 22. RESPIRATORY, THORACIC AND MEDIASTINAL OUTCOMES | PAIN WHEN BREATHING                     |  |
| 22. RESPIRATORY, THORACIC AND MEDIASTINAL OUTCOMES | PATHOLOGICAL LUNG FINDINGS              |  |
| 22. RESPIRATORY, THORACIC AND MEDIASTINAL OUTCOMES | PATTERNS OF PULMONARY MICROBIOME        |  |
| 22. RESPIRATORY, THORACIC AND MEDIASTINAL OUTCOMES | PERFUSION DEFECTED PERCENTAGE (QDP)     |  |
| 22. RESPIRATORY, THORACIC AND MEDIASTINAL OUTCOMES | PERFUSION DEFECTS                       |  |
| 22. RESPIRATORY, THORACIC AND MEDIASTINAL OUTCOMES | PERINATAL ASPHYXIA                      |  |
| 22. RESPIRATORY, THORACIC AND MEDIASTINAL OUTCOMES | PERSISTENT COUGH                        |  |



|                                                    |                                      |  |
|----------------------------------------------------|--------------------------------------|--|
| 22. RESPIRATORY, THORACIC AND MEDIASTINAL OUTCOMES | PERSISTENT DYSPNEA                   |  |
| 22. RESPIRATORY, THORACIC AND MEDIASTINAL OUTCOMES | PLEURAL EFFUSION                     |  |
| 22. RESPIRATORY, THORACIC AND MEDIASTINAL OUTCOMES | PLEURAL INCRASSATION                 |  |
| 22. RESPIRATORY, THORACIC AND MEDIASTINAL OUTCOMES | PLEURAL PAIN                         |  |
| 22. RESPIRATORY, THORACIC AND MEDIASTINAL OUTCOMES | PNEUMONIA                            |  |
| 22. RESPIRATORY, THORACIC AND MEDIASTINAL OUTCOMES | POST-INFLAMMATION PULMONARY FIBROSIS |  |
| 22. RESPIRATORY, THORACIC AND MEDIASTINAL OUTCOMES | POST-NASAL DISCHARGE                 |  |
| 22. RESPIRATORY, THORACIC AND MEDIASTINAL OUTCOMES | POTENTIAL PULMONARY SEQUELAE         |  |
| 22. RESPIRATORY, THORACIC AND MEDIASTINAL OUTCOMES | PULMONARY ABNORMALITIES              |  |
| 22. RESPIRATORY, THORACIC AND MEDIASTINAL OUTCOMES | PULMONARY FIBROSIS                   |  |
| 22. RESPIRATORY, THORACIC AND MEDIASTINAL OUTCOMES | PULMONARY FUNCTION                   |  |
| 22. RESPIRATORY, THORACIC AND MEDIASTINAL OUTCOMES | PULMONARY FUNCTION CHANGES           |  |
| 22. RESPIRATORY, THORACIC AND MEDIASTINAL OUTCOMES | QDP EXCLUSIVE                        |  |
| 22. RESPIRATORY, THORACIC AND MEDIASTINAL OUTCOMES | QDP TOTAL                            |  |
| 22. RESPIRATORY, THORACIC AND MEDIASTINAL OUTCOMES | RADIOLOGIC CHANGES                   |  |

|                                                    |                                                                                                                                                           |  |
|----------------------------------------------------|-----------------------------------------------------------------------------------------------------------------------------------------------------------|--|
| 22. RESPIRATORY, THORACIC AND MEDIASTINAL OUTCOMES | RESISTANCE R <sub>5</sub> , R <sub>20</sub> , R <sub>5</sub> -R <sub>20</sub> AND REACTANCE X <sub>5</sub> , X <sub>20</sub> , X INSPIRATORY-X EXPIRATORY |  |
| 22. RESPIRATORY, THORACIC AND MEDIASTINAL OUTCOMES | RESPIRATORY DISTRESS                                                                                                                                      |  |
| 22. RESPIRATORY, THORACIC AND MEDIASTINAL OUTCOMES | RESPIRATORY FAILURE AFTER COVID-19                                                                                                                        |  |
| 22. RESPIRATORY, THORACIC AND MEDIASTINAL OUTCOMES | RESPIRATORY FUNCTION                                                                                                                                      |  |
| 22. RESPIRATORY, THORACIC AND MEDIASTINAL OUTCOMES | RESPIRATORY FUNCTION RECOVERY                                                                                                                             |  |
| 22. RESPIRATORY, THORACIC AND MEDIASTINAL OUTCOMES | RESPIRATORY INSUFFECIENCY                                                                                                                                 |  |
| 22. RESPIRATORY, THORACIC AND MEDIASTINAL OUTCOMES | RESPIRATORY PROBLEMS                                                                                                                                      |  |
| 22. RESPIRATORY, THORACIC AND MEDIASTINAL OUTCOMES | RESPIRATORY SEQUELAE                                                                                                                                      |  |
| 22. RESPIRATORY, THORACIC AND MEDIASTINAL OUTCOMES | RESPIRATORY SEQUELAE OF COVID 19 INFECTION IN CHILDREN, BY CLINICAL EXAMINATION AND LABORATORY INVESTIGATIONS DURING 1 YEAR FOLLOW UP PERIOD              |  |
| 22. RESPIRATORY, THORACIC AND MEDIASTINAL OUTCOMES | RESPIRATORY SUPPORT                                                                                                                                       |  |
| 22. RESPIRATORY, THORACIC AND MEDIASTINAL OUTCOMES | RESPIRATORY SYMPTOMS                                                                                                                                      |  |
| 22. RESPIRATORY, THORACIC AND MEDIASTINAL OUTCOMES | RESTRICTIVE LUNG DISEASE                                                                                                                                  |  |
| 22. RESPIRATORY, THORACIC AND MEDIASTINAL OUTCOMES | RESTRICTIVE/OBSTRUCTIVE LUNG DISEASE                                                                                                                      |  |
| 22. RESPIRATORY, THORACIC AND MEDIASTINAL OUTCOMES | RHINITIS                                                                                                                                                  |  |

|                                                    |                                                |  |
|----------------------------------------------------|------------------------------------------------|--|
| 22. RESPIRATORY, THORACIC AND MEDIASTINAL OUTCOMES | RHINORRHOEA                                    |  |
| 22. RESPIRATORY, THORACIC AND MEDIASTINAL OUTCOMES | RISK FACTORS FOR PULMONARY SEQUELAE            |  |
| 22. RESPIRATORY, THORACIC AND MEDIASTINAL OUTCOMES | RUNNY NOSE                                     |  |
| 22. RESPIRATORY, THORACIC AND MEDIASTINAL OUTCOMES | SEVERE ACUTE RESPIRATORY SYNDROME              |  |
| 22. RESPIRATORY, THORACIC AND MEDIASTINAL OUTCOMES | SHORTNESS OF BREADTH                           |  |
| 22. RESPIRATORY, THORACIC AND MEDIASTINAL OUTCOMES | SHORTNESS OF BREATH                            |  |
| 22. RESPIRATORY, THORACIC AND MEDIASTINAL OUTCOMES | SHORTNESS OF BREATH (AT REST)                  |  |
| 22. RESPIRATORY, THORACIC AND MEDIASTINAL OUTCOMES | SHORTNESS OF BREATH (WITH PHYSICAL ACTIVITIES) |  |
| 22. RESPIRATORY, THORACIC AND MEDIASTINAL OUTCOMES | SHORTNESS OF BREATH WITH NOISY BREATHING       |  |
| 22. RESPIRATORY, THORACIC AND MEDIASTINAL OUTCOMES | SNEEZING                                       |  |
| 22. RESPIRATORY, THORACIC AND MEDIASTINAL OUTCOMES | SORE THROAT                                    |  |
| 22. RESPIRATORY, THORACIC AND MEDIASTINAL OUTCOMES | SPO <sub>2</sub>                               |  |
| 22. RESPIRATORY, THORACIC AND MEDIASTINAL OUTCOMES | SPO <sub>2</sub> EQUAL AND MORE THAN 92        |  |
| 22. RESPIRATORY, THORACIC AND MEDIASTINAL OUTCOMES | SPO <sub>2</sub> LESS THAN 92                  |  |
| 22. RESPIRATORY, THORACIC AND MEDIASTINAL OUTCOMES | STUFFY NOSE                                    |  |

|                                                    |                                                 |  |
|----------------------------------------------------|-------------------------------------------------|--|
| 22. RESPIRATORY, THORACIC AND MEDIASTINAL OUTCOMES | STUFFY RUNNING NOSE                             |  |
| 22. RESPIRATORY, THORACIC AND MEDIASTINAL OUTCOMES | SUBPLEURAL MULTIPLE CONSOLIDATIONS              |  |
| 22. RESPIRATORY, THORACIC AND MEDIASTINAL OUTCOMES | SWOLLEN GLANDS                                  |  |
| 22. RESPIRATORY, THORACIC AND MEDIASTINAL OUTCOMES | TACHYPNEA                                       |  |
| 22. RESPIRATORY, THORACIC AND MEDIASTINAL OUTCOMES | THICK NASAL DISCHARGE                           |  |
| 22. RESPIRATORY, THORACIC AND MEDIASTINAL OUTCOMES | THORACIC PAIN COMPLAINTS                        |  |
| 22. RESPIRATORY, THORACIC AND MEDIASTINAL OUTCOMES | THROAT PAIN                                     |  |
| 22. RESPIRATORY, THORACIC AND MEDIASTINAL OUTCOMES | THROAT SYMPTOMS                                 |  |
| 22. RESPIRATORY, THORACIC AND MEDIASTINAL OUTCOMES | THROAT/CHEST PAIN                               |  |
| 22. RESPIRATORY, THORACIC AND MEDIASTINAL OUTCOMES | TO CORRELATE FOT INDICES                        |  |
| 22. RESPIRATORY, THORACIC AND MEDIASTINAL OUTCOMES | TRANSIENT TACHYPNEA OF NEWBORN                  |  |
| 22. RESPIRATORY, THORACIC AND MEDIASTINAL OUTCOMES | TROUBLE BREATHING                               |  |
| 22. RESPIRATORY, THORACIC AND MEDIASTINAL OUTCOMES | UNUSUAL CHEST PAIN                              |  |
| 22. RESPIRATORY, THORACIC AND MEDIASTINAL OUTCOMES | UNUSUALLY HOARSE VOICE                          |  |
| 22. RESPIRATORY, THORACIC AND MEDIASTINAL OUTCOMES | VARYING DEGREES OF USUAL INTERSTITIAL PNEUMONIA |  |

|                                                    |                                             |     |
|----------------------------------------------------|---------------------------------------------|-----|
| 22. RESPIRATORY, THORACIC AND MEDIASTINAL OUTCOMES | VDP EXCLUSIVE                               |     |
| 22. RESPIRATORY, THORACIC AND MEDIASTINAL OUTCOMES | VDP FVL                                     |     |
| 22. RESPIRATORY, THORACIC AND MEDIASTINAL OUTCOMES | VDP FVL EXCLUSIVE                           |     |
| 22. RESPIRATORY, THORACIC AND MEDIASTINAL OUTCOMES | VDP TOTAL                                   |     |
| 22. RESPIRATORY, THORACIC AND MEDIASTINAL OUTCOMES | VENTILATION AND PERFUSION OF THE LUNG       |     |
| 22. RESPIRATORY, THORACIC AND MEDIASTINAL OUTCOMES | VENTILATION DEFECTED PERCENTAGE (VDP)       |     |
| 22. RESPIRATORY, THORACIC AND MEDIASTINAL OUTCOMES | VENTILATION DEFECTS                         |     |
| 22. RESPIRATORY, THORACIC AND MEDIASTINAL OUTCOMES | VENTILATION/PERFUSION MATCH (VQM DEFECT)    |     |
| 22. RESPIRATORY, THORACIC AND MEDIASTINAL OUTCOMES | VENTILATION/PERFUSION MISMATCH (VQM DEFECT) |     |
| 22. RESPIRATORY, THORACIC AND MEDIASTINAL OUTCOMES | VIRAL UPPER RESPIRATORY INFECTION           |     |
| 22. RESPIRATORY, THORACIC AND MEDIASTINAL OUTCOMES | VQM DEFECT                                  |     |
| 22. RESPIRATORY, THORACIC AND MEDIASTINAL OUTCOMES | VQM DEFECT, FVL                             |     |
| 22. RESPIRATORY, THORACIC AND MEDIASTINAL OUTCOMES | VQM NON-DEFECT                              |     |
| 22. RESPIRATORY, THORACIC AND MEDIASTINAL OUTCOMES | VQM NON-DEFECT, FVL                         |     |
| 22. RESPIRATORY, THORACIC AND MEDIASTINAL OUTCOMES | WHEEZING                                    | 180 |

|                                           |                                                                                                                               |  |
|-------------------------------------------|-------------------------------------------------------------------------------------------------------------------------------|--|
| 23. SKIN AND SUBCUTANEOUS TISSUE OUTCOMES | BLISTERS                                                                                                                      |  |
| 23. SKIN AND SUBCUTANEOUS TISSUE OUTCOMES | CORRELATION BETWEEN CUTANEOUS MANIFESTATIONS IN RECOVERED PATIENT OF COVID 19 THERAPEUTIC REGIME USED DURING TREATMENT PERIOD |  |
| 23. SKIN AND SUBCUTANEOUS TISSUE OUTCOMES | CORRELATION BETWEEN CUTANEOUS MANIFESTATIONS IN RECOVERED PATIENT OF COVID 19 WITH DISEASE SEVERITY                           |  |
| 23. SKIN AND SUBCUTANEOUS TISSUE OUTCOMES | CORRELATIONS BETWEEN DEMOGRAPHIC PARAMETER AND SKIN MANIFESTATIONS IN RECOVERED PATIENT OF COVID-19                           |  |
| 23. SKIN AND SUBCUTANEOUS TISSUE OUTCOMES | COVID TOE                                                                                                                     |  |
| 23. SKIN AND SUBCUTANEOUS TISSUE OUTCOMES | CUTANEOUS RASH                                                                                                                |  |
| 23. SKIN AND SUBCUTANEOUS TISSUE OUTCOMES | DERMATITIS                                                                                                                    |  |
| 23. SKIN AND SUBCUTANEOUS TISSUE OUTCOMES | DERMATOLOGICAL CHANGES                                                                                                        |  |
| 23. SKIN AND SUBCUTANEOUS TISSUE OUTCOMES | DERMATOLOGICAL SYMPTOMS                                                                                                       |  |
| 23. SKIN AND SUBCUTANEOUS TISSUE OUTCOMES | DRY SKIN                                                                                                                      |  |
| 23. SKIN AND SUBCUTANEOUS TISSUE OUTCOMES | EDEMA                                                                                                                         |  |
| 23. SKIN AND SUBCUTANEOUS TISSUE OUTCOMES | HAIR                                                                                                                          |  |
| 23. SKIN AND SUBCUTANEOUS TISSUE OUTCOMES | HAIR LOSS                                                                                                                     |  |
| 23. SKIN AND SUBCUTANEOUS TISSUE OUTCOMES | HIVES                                                                                                                         |  |
| 23. SKIN AND SUBCUTANEOUS TISSUE OUTCOMES | HYPERHIDROSIS                                                                                                                 |  |

|                                           |                                                                          |  |
|-------------------------------------------|--------------------------------------------------------------------------|--|
| 23. SKIN AND SUBCUTANEOUS TISSUE OUTCOMES | ITCHING SKIN                                                             |  |
| 23. SKIN AND SUBCUTANEOUS TISSUE OUTCOMES | ITCHY SKIN                                                               |  |
| 23. SKIN AND SUBCUTANEOUS TISSUE OUTCOMES | LUMPS OR RASHES (PURPLE/PINK) ON TOES                                    |  |
| 23. SKIN AND SUBCUTANEOUS TISSUE OUTCOMES | MOTTLED FEET                                                             |  |
| 23. SKIN AND SUBCUTANEOUS TISSUE OUTCOMES | PLANTAR WART                                                             |  |
| 23. SKIN AND SUBCUTANEOUS TISSUE OUTCOMES | PROBLEMS WITH TEETH OR GUMS                                              |  |
| 23. SKIN AND SUBCUTANEOUS TISSUE OUTCOMES | PSORIASIS FLARE                                                          |  |
| 23. SKIN AND SUBCUTANEOUS TISSUE OUTCOMES | RAISED WELTS ON SKIN OR SWELLING                                         |  |
| 23. SKIN AND SUBCUTANEOUS TISSUE OUTCOMES | RAISED, RED, ITCHY WELTS ON THE SKIN/SUDDEN SWELLING OF THE FACE OR LIPS |  |
| 23. SKIN AND SUBCUTANEOUS TISSUE OUTCOMES | RASH                                                                     |  |
| 23. SKIN AND SUBCUTANEOUS TISSUE OUTCOMES | RASHES                                                                   |  |
| 23. SKIN AND SUBCUTANEOUS TISSUE OUTCOMES | RED OR PURPLE SORES OR BLISTERS ON FEET                                  |  |
| 23. SKIN AND SUBCUTANEOUS TISSUE OUTCOMES | RED WELTS                                                                |  |
| 23. SKIN AND SUBCUTANEOUS TISSUE OUTCOMES | RED/PURPLE SORES/BLISTERS ON FEET, INCLUDING TOES                        |  |
| 23. SKIN AND SUBCUTANEOUS TISSUE OUTCOMES | REDNESS SKIN                                                             |  |

|                                           |                                                                                                                                             |    |
|-------------------------------------------|---------------------------------------------------------------------------------------------------------------------------------------------|----|
| 23. SKIN AND SUBCUTANEOUS TISSUE OUTCOMES | SKIN IRRITATION/LESIONS                                                                                                                     |    |
| 23. SKIN AND SUBCUTANEOUS TISSUE OUTCOMES | SKIN LESIONS                                                                                                                                |    |
| 23. SKIN AND SUBCUTANEOUS TISSUE OUTCOMES | SKIN RASH                                                                                                                                   |    |
| 23. SKIN AND SUBCUTANEOUS TISSUE OUTCOMES | SKIN RASH - IF YES, TICK ALL BODY AREAS THAT APPLY: FACE, TRUNK (STOMACH OR BACK), ARMS, LEGS, BUTTOCKS, TOES, FINGERS, ACCOMPANIED BY ITCH |    |
| 23. SKIN AND SUBCUTANEOUS TISSUE OUTCOMES | SKIN RASHES (FACE, TRUNK, ARMS, LEGS, BUTTOCKS, TOES, FINGERS, ACCOMPANIED BY ITCH)                                                         |    |
| 23. SKIN AND SUBCUTANEOUS TISSUE OUTCOMES | SUBCUTANEOUS NODULES                                                                                                                        |    |
| 23. SKIN AND SUBCUTANEOUS TISSUE OUTCOMES | SWEATINESS                                                                                                                                  |    |
| 23. SKIN AND SUBCUTANEOUS TISSUE OUTCOMES | SWELLING                                                                                                                                    |    |
| 23. SKIN AND SUBCUTANEOUS TISSUE OUTCOMES | SWELLING OF BODY                                                                                                                            |    |
| 23. SKIN AND SUBCUTANEOUS TISSUE OUTCOMES | SWOLLEN TOES AND/OR FINGERS                                                                                                                 |    |
| 23. SKIN AND SUBCUTANEOUS TISSUE OUTCOMES | URTICARIA                                                                                                                                   | 41 |
| 24. VASCULAR OUTCOMES                     | BLEEDING                                                                                                                                    |    |
| 24. VASCULAR OUTCOMES                     | BLEEDING (IF YES, SPECIFY BLEEDING SITE)                                                                                                    |    |
| 24. VASCULAR OUTCOMES                     | EPISTAXIS                                                                                                                                   |    |
| 24. VASCULAR OUTCOMES                     | GANGRENE                                                                                                                                    |    |
| 24. VASCULAR OUTCOMES                     | HEMORRHAGE                                                                                                                                  |    |
| 24. VASCULAR OUTCOMES                     | PERIPHERAL VASCULAR DISEASE                                                                                                                 |    |
| 24. VASCULAR OUTCOMES                     | PULMONARY EMBOLISM                                                                                                                          |    |



|                          |                                                                         |    |
|--------------------------|-------------------------------------------------------------------------|----|
| 24. VASCULAR OUTCOMES    | PULMONARY EMBOLISM AFTER COVID-19                                       |    |
| 24. VASCULAR OUTCOMES    | SINUS VEIN THROMBOSIS                                                   |    |
| 24. VASCULAR OUTCOMES    | THROMBOSIS                                                              |    |
| 24. VASCULAR OUTCOMES    | VASCULITIS                                                              |    |
| 24. VASCULAR OUTCOMES    | VASOACTIVE AGENTS USE                                                   |    |
| 24. VASCULAR OUTCOMES    | VASOMOTOR COMPLAINTS                                                    |    |
| 24. VASCULAR OUTCOMES    | VENOUS THROMBOEMBOLISM                                                  | 14 |
| 25. PHYSICAL FUNCTIONING | CANNOT FULLY MOVE OR CONTROL MOVEMENT                                   |    |
| 25. PHYSICAL FUNCTIONING | DECREASED ACTIVITY LEVEL                                                |    |
| 25. PHYSICAL FUNCTIONING | DECREASED PHYSICAL STRENGTH                                             |    |
| 25. PHYSICAL FUNCTIONING | EARLY EFFECTS OF SEVERE ACUTE RESPIRATORY SYNDROME ON EXERCISE CAPACITY |    |
| 25. PHYSICAL FUNCTIONING | EXERCISE CAPACITY                                                       |    |
| 25. PHYSICAL FUNCTIONING | EXERCISE INTOLERANCE                                                    |    |
| 25. PHYSICAL FUNCTIONING | EXERCISE TOLERANCE                                                      |    |
| 25. PHYSICAL FUNCTIONING | FEELING EXHAUSTED AFTER WALKING                                         |    |
| 25. PHYSICAL FUNCTIONING | FUNCTIONAL SECONDARY OUTCOMES                                           |    |
| 25. PHYSICAL FUNCTIONING | IMPAIRMENT IN DAILY ACTIVITIES                                          |    |
| 25. PHYSICAL FUNCTIONING | LATE EFFECTS OF SEVERE ACUTE RESPIRATORY SYNDROME ON EXERCISE CAPACITY  |    |
| 25. PHYSICAL FUNCTIONING | LOWER LIMB MUSCLE ENDURANCE                                             |    |
| 25. PHYSICAL FUNCTIONING | MILD LIMITATIONS IN DAILY FUNCTIONING                                   |    |
| 25. PHYSICAL FUNCTIONING | MOVEMENT DISORDERS                                                      |    |
| 25. PHYSICAL FUNCTIONING | MUSCLE STRENGTH                                                         |    |
| 25. PHYSICAL FUNCTIONING | NO LIMITATIONS IN DAILY FUNCTIONING                                     |    |
| 25. PHYSICAL FUNCTIONING | NUMBER OF FUNCTIONAL LIMITATIONS                                        |    |
| 25. PHYSICAL FUNCTIONING | OVERALL PHYSICAL FUNCTION RECOVERY                                      |    |
| 25. PHYSICAL FUNCTIONING | PHYSICAL ACTIVITY                                                       |    |

|                          |                                                                                                           |    |
|--------------------------|-----------------------------------------------------------------------------------------------------------|----|
| 25. PHYSICAL FUNCTIONING | PHYSICAL FUNCTION                                                                                         |    |
| 25. PHYSICAL FUNCTIONING | PHYSICAL SCORE                                                                                            |    |
| 25. PHYSICAL FUNCTIONING | PHYSICAL STRENGTH                                                                                         |    |
| 25. PHYSICAL FUNCTIONING | PHYSICAL SYMPTOMS                                                                                         |    |
| 25. PHYSICAL FUNCTIONING | POST-EXCERCITIONAL MALAISE                                                                                |    |
| 25. PHYSICAL FUNCTIONING | REDUCED PHYSICAL PERFORMANCE                                                                              |    |
| 25. PHYSICAL FUNCTIONING | SEVERE LIMITATIONS IN DAILY FUNCTIONING                                                                   |    |
| 25. PHYSICAL FUNCTIONING | SHORTNESS OF BREATH AFTER ACTIVITY                                                                        |    |
| 25. PHYSICAL FUNCTIONING | SHORTNESS OF BREATH AT REST                                                                               |    |
| 25. PHYSICAL FUNCTIONING | SOME/LOTS OF MOBILITY PROBLEMS                                                                            |    |
| 25. PHYSICAL FUNCTIONING | SOME/LOTS OF PROBLEMS WITH USUAL ACTIVITIES                                                               |    |
| 25. PHYSICAL FUNCTIONING | SOME/LOTS OF SELF-CARE PROBLEMS                                                                           |    |
| 25. PHYSICAL FUNCTIONING | WALKING INTOLERANCE                                                                                       | 32 |
| 26. SOCIAL FUNCTIONING   | CONSIDERATE OF OTHER PEOPLE'S FEELINGS (I TRY TO BE NICE TO OTHER PEOPLE)                                 |    |
| 26. SOCIAL FUNCTIONING   | FEELING CLOSE TO OTHER PEOPLE                                                                             |    |
| 26. SOCIAL FUNCTIONING   | GENERALLY LIKED BY OTHER CHILDREN (OTHER PEOPLE MY AGE GENERALLY LIKE ME)                                 |    |
| 26. SOCIAL FUNCTIONING   | GENERALLY OBEDIENT... (I USUALLY DO AS I AM TOLD)                                                         |    |
| 26. SOCIAL FUNCTIONING   | GETS ON BETTER WITH ADULTS THAN WITH OTHER CHILDREN (I GET ON BETTER WITH ADULTS THAN WITH PEOPLE MY AGE) |    |
| 26. SOCIAL FUNCTIONING   | HAS AT LEAST ONE GOOD FRIEND (I HAVE ONE GOOD FRIEND OR MORE)                                             |    |
| 26. SOCIAL FUNCTIONING   | HELPFUL IF SOMEONE IS HURT (I AM HELPFUL IS SOMEONE IS HURT...)                                           |    |
| 26. SOCIAL FUNCTIONING   | KIND TO YOUNGER CHILDREN (I AM KIND TO YOUNGER CHILDREN)                                                  |    |
| 26. SOCIAL FUNCTIONING   | OFTEN FIGHTS WITH OTHER CHILDREN... (I FIGHT A LOT)                                                       |    |
| 26. SOCIAL FUNCTIONING   | OFTEN LIES OR CHEATS (I AM OFTEN ACCUSED OF LYING OR CHEATING)                                            |    |
| 26. SOCIAL FUNCTIONING   | OFTEN VOLUNTEERS TO HELP OTHERS (I OFTEN VOLUNTEER TO HELP OTHERS)                                        |    |

|                                     |                                                                                                                                                                                                       |    |
|-------------------------------------|-------------------------------------------------------------------------------------------------------------------------------------------------------------------------------------------------------|----|
| 26. SOCIAL FUNCTIONING              | PICKED ON OR BULLIED BY OTHER CHILDREN (OTHER CHILDREN OR YOUNG PEOPLE PICK ON ME)                                                                                                                    |    |
| 26. SOCIAL FUNCTIONING              | RATHER SOLITARY, TENDS TO PLAY ALONE (I AM USUALLY ON MY OWN)                                                                                                                                         |    |
| 26. SOCIAL FUNCTIONING              | RELATIONSHIPS                                                                                                                                                                                         |    |
| 26. SOCIAL FUNCTIONING              | SHARES READILY WITH OTHER CHILDREN (I USUALLY SHARE WITH OTHERS)                                                                                                                                      |    |
| 26. SOCIAL FUNCTIONING              | SPENDING TIME WITH FRIENDS IN PERSON                                                                                                                                                                  |    |
| 26. SOCIAL FUNCTIONING              | SPENDING TIME WITH FRIENDS REMOTELY                                                                                                                                                                   | 17 |
| 27. ROLE FUNCTIONING                | ABSENCE AT SCHOOL/KINDERGARTEN AFTER RECOVERING FROM COVID-19 BECAUSE OF THE ABOVE SYMPTOMS?                                                                                                          |    |
| 27. ROLE FUNCTIONING                | ATTENDING SCHOOL/NURSERY                                                                                                                                                                              |    |
| 27. ROLE FUNCTIONING                | REDUCED PRODUCTIVITY                                                                                                                                                                                  | 3  |
| 28. EMOTIONAL FUNCTIONING/WELLBEING | A BIT/VERY WORRIED, SAD/UNHAPPY                                                                                                                                                                       |    |
| 28. EMOTIONAL FUNCTIONING/WELLBEING | EVERYDAY WAS FULL OF THINGS THAT INTEREST THE CHILD (ALL THE TIME, MOST OF THE TIME, A LITTLE MORE THAN HALF OF THE TIME, A LITTLE LESS THAN HALF OF THE TIME A BIT OF THE TIME, AT NO POINT IN TIME) |    |
| 28. EMOTIONAL FUNCTIONING/WELLBEING | FEELING CALM AND RELAXED (ALL THE TIME, MOST OF THE TIME, A LITTLE MORE THAN HALF OF THE TIME, A LITTLE LESS THAN HALF OF THE TIME A BIT OF THE TIME, AT NO POINT IN TIME)                            |    |
| 28. EMOTIONAL FUNCTIONING/WELLBEING | FEELING OPTIMISTIC ABOUT THE FUTURE                                                                                                                                                                   |    |
| 28. EMOTIONAL FUNCTIONING/WELLBEING | FEELING WELL RESTED (ALL THE TIME, MOST OF THE TIME, A LITTLE MORE THAN HALF OF THE TIME, A LITTLE LESS THAN HALF OF THE TIME A BIT OF THE TIME, AT NO POINT IN TIME)                                 |    |
| 28. EMOTIONAL FUNCTIONING/WELLBEING | FULL OF ENERGY (ALL THE TIME, MOST OF THE TIME, A LITTLE MORE THAN HALF OF THE TIME, A LITTLE LESS THAN HALF OF THE TIME A BIT OF THE TIME, AT NO POINT IN TIME)                                      |    |
| 28. EMOTIONAL FUNCTIONING/WELLBEING | HAPPINESS/GOOD MOOD (ALL THE TIME, MOST OF THE TIME, A LITTLE MORE THAN HALF OF THE TIME, A LITTLE LESS THAN HALF OF THE TIME A BIT OF THE TIME, AT NO POINT IN TIME)                                 |    |

|                                     |                                                |   |
|-------------------------------------|------------------------------------------------|---|
| 28. EMOTIONAL FUNCTIONING/WELLBEING | WELLBEING                                      | 8 |
| 29. COGNITIVE FUNCTIONING           | AFFECTED MEMORY                                |   |
| 29. COGNITIVE FUNCTIONING           | ATTENTION OR MEMORY DEFICIT                    |   |
| 29. COGNITIVE FUNCTIONING           | BRAIN FOG                                      |   |
| 29. COGNITIVE FUNCTIONING           | COGNITIVE DISTURBANCES                         |   |
| 29. COGNITIVE FUNCTIONING           | COGNITIVE DYSFUNCTION                          |   |
| 29. COGNITIVE FUNCTIONING           | COGNITIVE FUNCTION IMPAIRMENT                  |   |
| 29. COGNITIVE FUNCTIONING           | COGNITIVE IMPAIRMENT/'BRAIN FOG'               |   |
| 29. COGNITIVE FUNCTIONING           | COGNITIVE SCORE                                |   |
| 29. COGNITIVE FUNCTIONING           | COMMUNICATION SCORE                            |   |
| 29. COGNITIVE FUNCTIONING           | CONCENTRATION DIFFICULTIES                     |   |
| 29. COGNITIVE FUNCTIONING           | CONCENTRATION IMPAIRMENT/CONCENTRATION DEFICIT |   |
| 29. COGNITIVE FUNCTIONING           | CONCENTRATION PROBLEMS                         |   |
| 29. COGNITIVE FUNCTIONING           | CONFUSION                                      |   |
| 29. COGNITIVE FUNCTIONING           | CONFUSION, DISORIENTATION, OR DROWSINESS       |   |
| 29. COGNITIVE FUNCTIONING           | CONFUSION/LACK OF CONCENTRATION                |   |
| 29. COGNITIVE FUNCTIONING           | DIFFICULT TO FIND THE RIGHT WORD               |   |
| 29. COGNITIVE FUNCTIONING           | DIFFICULTIES CONCENTRATING                     |   |
| 29. COGNITIVE FUNCTIONING           | DIFFICULTIES MANAGING SCHOOL                   |   |
| 29. COGNITIVE FUNCTIONING           | DIFFICULTY CONCENTRATING                       |   |
| 29. COGNITIVE FUNCTIONING           | DISORIENTATION                                 |   |
| 29. COGNITIVE FUNCTIONING           | FORGETFULNESS                                  |   |
| 29. COGNITIVE FUNCTIONING           | IMPAIRED ATTENTION                             |   |
| 29. COGNITIVE FUNCTIONING           | LEARNING DIFFICULTIES                          |   |
| 29. COGNITIVE FUNCTIONING           | MEMORY IMPAIRMENT                              |   |
| 29. COGNITIVE FUNCTIONING           | MEMORY LOSS                                    |   |

|                            |                                                                            |    |
|----------------------------|----------------------------------------------------------------------------|----|
| 29. COGNITIVE FUNCTIONING  | MEMORY PROBLEMS                                                            |    |
| 29. COGNITIVE FUNCTIONING  | PROBLEMS SPEAKING OR COMMUNICATING                                         |    |
| 29. COGNITIVE FUNCTIONING  | PROBLEMS WITH CONCENTRATION                                                |    |
| 29. COGNITIVE FUNCTIONING  | PROBLEMS WITH MEMORY                                                       |    |
| 29. COGNITIVE FUNCTIONING  | REDUCED CONCENTRATION                                                      |    |
| 29. COGNITIVE FUNCTIONING  | SHORT-TERM MEMORY LOSS                                                     |    |
| 29. COGNITIVE FUNCTIONING  | SOCIAL-EMOTIONAL SCORE                                                     |    |
| 29. COGNITIVE FUNCTIONING  | SPEECH AND LANGUAGE DISORDERS                                              |    |
| 29. COGNITIVE FUNCTIONING  | SPEECH DISTURBANCES                                                        |    |
| 29. COGNITIVE FUNCTIONING  | SPEECH/LANGUAGE ABNORMALITIES                                              |    |
| 29. COGNITIVE FUNCTIONING  | STATES OF CONFUSION                                                        |    |
| 29. COGNITIVE FUNCTIONING  | THINKING CLEARLY                                                           |    |
| 29. COGNITIVE FUNCTIONING  | TROUBLE CONCENTRATING                                                      |    |
| 29. COGNITIVE FUNCTIONING  | TROUBLE FORMING WORDS                                                      |    |
| 29. COGNITIVE FUNCTIONING  | TROUBLE REMEMBERING THINGS                                                 |    |
| 29. COGNITIVE FUNCTIONING  | YOUR MIND GOING BLANK                                                      | 41 |
| 30. GLOBAL QUALITY OF LIFE | EARLY EFFECTS OF SEVERE ACUTE RESPIRATORY SYNDROME ON HRQoL                |    |
| 30. GLOBAL QUALITY OF LIFE | EMOTIONAL FUNCTIONING                                                      |    |
| 30. GLOBAL QUALITY OF LIFE | HEALTH RELATED QUALITY OF LIFE                                             |    |
| 30. GLOBAL QUALITY OF LIFE | HEALTH-RELATED QUALITY OF LIFE (HRQoL) OF PATIENTS DIAGNOSED WITH COVID-19 |    |
| 30. GLOBAL QUALITY OF LIFE | HEALTH-RELATED QUALITY OF LIFE AND SOCIAL IMPACT                           |    |
| 30. GLOBAL QUALITY OF LIFE | LATE EFFECTS OF SEVERE ACUTE RESPIRATORY SYNDROME ON HRQoL                 |    |
| 30. GLOBAL QUALITY OF LIFE | PHYSICAL FUNCTIONING                                                       |    |
| 30. GLOBAL QUALITY OF LIFE | QoL AT TIME OF SURVEY                                                      |    |
| 30. GLOBAL QUALITY OF LIFE | QoL BEFORE COVID-19                                                        |    |
| 30. GLOBAL QUALITY OF LIFE | QUALITY OF LIFE                                                            |    |

|                                   |                                                                                                                                        |    |
|-----------------------------------|----------------------------------------------------------------------------------------------------------------------------------------|----|
| 30. GLOBAL QUALITY OF LIFE        | QUALITY OF LIFE AND SOCIAL IMPACT                                                                                                      |    |
| 30. GLOBAL QUALITY OF LIFE        | QUALITY OF LIFE/FUNCTIONING                                                                                                            |    |
| 30. GLOBAL QUALITY OF LIFE        | SCHOOL FUNCTIONING                                                                                                                     |    |
| 30. GLOBAL QUALITY OF LIFE        | SOCIAL FUNCTIONING                                                                                                                     | 14 |
| 31. PERCEIVED HEALTH STATUS       | HEALTH AFTER COVID-19                                                                                                                  |    |
| 31. PERCEIVED HEALTH STATUS       | HEALTH BEFORE COVID-19                                                                                                                 |    |
| 31. PERCEIVED HEALTH STATUS       | HEALTH STATUS BEFORE AND AFTER COVID-19                                                                                                |    |
| 31. PERCEIVED HEALTH STATUS       | SELF-RATED HEALTH                                                                                                                      | 4  |
| 32. DELIVERY OF CARE              |                                                                                                                                        |    |
| 33. PERSONAL CIRCUMSTANCES        | DISABILITY                                                                                                                             |    |
| 33. PERSONAL CIRCUMSTANCES        | LIFE EVENTS                                                                                                                            |    |
| 33. PERSONAL CIRCUMSTANCES        | LIFE EVENTS EXPLAINING THE MENTIONED CHANGES                                                                                           |    |
| 33. PERSONAL CIRCUMSTANCES        | SPENDING TIME OUTSIDE                                                                                                                  |    |
| 33. PERSONAL CIRCUMSTANCES        | SPENDING TIME WATCHING TV, PLAYING VIDEO/COMPUTER GAMES, OR USING SOCIAL MEDIA FOR EDUCATIONAL PURPOSES, INCLUDING SCHOOL/NURSERY WORK |    |
| 33. PERSONAL CIRCUMSTANCES        | SPENDING TIME WATCHING TV, PLAYING VIDEO/COMPUTER GAMES, OR USING SOCIAL MEDIA FOR NON-EDUCATIONAL PURPOSES                            | 6  |
| 34. ECONOMIC                      | INDEX OF MULTIPLE DEPRIVATION                                                                                                          | 1  |
| 35. HOSPITAL                      |                                                                                                                                        |    |
| 36. NEED FOR FURTHER INTERVENTION | ADMISSION TO THE ICU                                                                                                                   |    |
| 36. NEED FOR FURTHER INTERVENTION | CHANGE IN CHILD SARS-CoV-2 TREATMENT RECORD                                                                                            |    |
| 36. NEED FOR FURTHER INTERVENTION | CONTACTS TO THE GENERAL PRACTITIONER                                                                                                   |    |
| 36. NEED FOR FURTHER INTERVENTION | DIAGNOSES                                                                                                                              |    |
| 36. NEED FOR FURTHER INTERVENTION | DURATION OF PICU HOSPITALIZATION                                                                                                       |    |
| 36. NEED FOR FURTHER INTERVENTION | DURATION OF WARD ADMISSION                                                                                                             |    |
| 36. NEED FOR FURTHER INTERVENTION | FREQUENCY OF FAMILY DOCTOR VISITS AFTER RECOVERING FROM COVID-19                                                                       |    |
| 36. NEED FOR FURTHER INTERVENTION | FREQUENCY OF SPECIALIST VISITS AFTER RECOVERING FROM COVID-19                                                                          |    |

|                                   |                                                                                  |    |
|-----------------------------------|----------------------------------------------------------------------------------|----|
| 36. NEED FOR FURTHER INTERVENTION | HOSPITAL ADMISSION AFTER THE COVID-19 (HOW MANY TIMES, REASON, NAME OF HOSPITAL) |    |
| 36. NEED FOR FURTHER INTERVENTION | HOSPITAL READMISSION                                                             |    |
| 36. NEED FOR FURTHER INTERVENTION | HOSPITALIZATION AFTER SARS-CoV-2 INFECTION                                       |    |
| 36. NEED FOR FURTHER INTERVENTION | HOSPITALIZATION/REHOSPITALIZATION                                                |    |
| 36. NEED FOR FURTHER INTERVENTION | HOSPITALIZATIONS                                                                 |    |
| 36. NEED FOR FURTHER INTERVENTION | INCREASE IN PRIMARY HEALTH CARE USE                                              |    |
| 36. NEED FOR FURTHER INTERVENTION | MEDICAL RESOURCE UTILIZATION FOR PATIENTS DIAGNOSED WITH COVID-19                |    |
| 36. NEED FOR FURTHER INTERVENTION | NEED FOR HOSPITAL CARE                                                           |    |
| 36. NEED FOR FURTHER INTERVENTION | NUMBER OF GP VISITS                                                              |    |
| 36. NEED FOR FURTHER INTERVENTION | PEDIATRIC INTENSIVE CARE UNIT HOSPITALIZATION                                    |    |
| 36. NEED FOR FURTHER INTERVENTION | PRESCRIBED DRUGS                                                                 |    |
| 36. NEED FOR FURTHER INTERVENTION | REQUIRED A REFERRAL TO A PEDIATRIC CARDIOLOGIST FOR UNSPECIFIED REASONS          |    |
| 36. NEED FOR FURTHER INTERVENTION | REQUIRED PHYSICAL THERAPY                                                        |    |
| 36. NEED FOR FURTHER INTERVENTION | STUDIES PERFORMED AFTER RECOVERING FROM COVID-19                                 |    |
| 36. NEED FOR FURTHER INTERVENTION | VISIT TO OTHER HEALTH FACILITY AFTER THE COVID-19 (HOW MANY TIMES, REASON)       | 23 |
| 37. SOCIETAL/CARER BURDEN         | CAREGIVER SARS-CoV-2 VACCINATION STATUS                                          |    |
| 37. SOCIETAL/CARER BURDEN         | CAREGIVER SYMPTOMS                                                               |    |
| 37. SOCIETAL/CARER BURDEN         | CHANGE IN CAREGIVER SARS-CoV-2 TREATMENT RECORD                                  |    |
| 37. SOCIETAL/CARER BURDEN         | HELP REQUEST BECAUSE OF COVID-19 CONSEQUENCES                                    | 4  |
| 38. ADVERSE EVENTS/EFFECTS        | EPISODE OF POST-TUSSIVE VOMITING                                                 |    |
| 38. ADVERSE EVENTS/EFFECTS        | ADVERSE EVENTS                                                                   | 2  |

\*DODD S, CLARKE M, BECKER L, MAVERGAMES C, FISH R, WILLIAMSON PR. A TAXONOMY HAS BEEN DEVELOPED FOR OUTCOMES IN MEDICAL RESEARCH TO HELP IMPROVE KNOWLEDGE DISCOVERY. J CLIN EPIDEMIOL. 2018;96:84-92. DOI:10.1016/J.JCLINEPI.2017.12.020

#### 4. THE LIST OF OUTCOMES PRESENTED TO THE DELPHI PARTICIPANTS.

| Domain name            | Outcome                                                       | Lay definition                                                                                                                                                                                                                                                                                                                                                       |
|------------------------|---------------------------------------------------------------|----------------------------------------------------------------------------------------------------------------------------------------------------------------------------------------------------------------------------------------------------------------------------------------------------------------------------------------------------------------------|
| Mortality/survival     | Survival                                                      | How long does someone live                                                                                                                                                                                                                                                                                                                                           |
| Physiological/clinical | Cardiovascular functioning, symptoms, and conditions          | New onset or worsening of problems affecting the heart (e.g. irregular heartbeat, palpitations, pounding or racing heartbeat, resting heartbeat changes, pericarditis/myocarditis (heart inflammation)); problems with the blood vessels (i.e., veins or arteries), changes in blood pressure                                                                        |
| Physiological/clinical | Endocrine and metabolic functioning, symptoms, and conditions | New onset or worsening of problems related to the glands (type of body organ) that make hormones, hormonal balance (e.g. diabetes, thyroid problems, adrenal gland or steroid problems, changes in body weight, bone mineral problems), menstrual cycle, early onset of puberty                                                                                      |
| Physiological/clinical | Hearing-related functioning, symptoms, and conditions         | New onset or worsening of problems with hearing (e.g., hearing loss, ringing or buzzing in the ears, increased sensitivity to sounds)                                                                                                                                                                                                                                |
| Physiological/clinical | Gastrointestinal functioning, symptoms, and conditions        | New onset or worsening of problems with swallowing, stomach aches, nausea (feeling the need to vomit), vomiting, heartburn/reflux (stomach acid coming back up into the mouth and causing an unpleasant, sour taste), diarrhoea, constipation, gas, indigestion, lack of pleasure while eating (some children describe this as “food and eating is yuck”)            |
| Physiological/clinical | Pain                                                          | New onset or worsening discomfort in the body that can include sharp or burning pain, dull ache, or stinging or throbbing, including pain that comes and goes, or is persistent, or chronic (ongoing) pain; increased sensitivity to pain (feeling pain even upon minor stimuli which have not caused pain before), inability to control pain with usual painkillers |
| Physiological/clinical | Fatigue or Exhaustion                                         | New onset or worsening of feeling exhausted, having too little energy, or needing more rest, including fatigue not relieved by rest                                                                                                                                                                                                                                  |
| Physiological/clinical | Sleep-related functioning, symptoms, and conditions           | New onset or worsening of problems with falling or staying asleep, need for sleep medications/aids, excessive sleeping, or lack of refreshing sleep/poor sleep quality, increased nightmares and/or sleepwalking                                                                                                                                                     |



|                        |                                                                              |                                                                                                                                                                                                                                                                                                                                                                                                                                                                                                                                                                                                                                                                                                                                              |
|------------------------|------------------------------------------------------------------------------|----------------------------------------------------------------------------------------------------------------------------------------------------------------------------------------------------------------------------------------------------------------------------------------------------------------------------------------------------------------------------------------------------------------------------------------------------------------------------------------------------------------------------------------------------------------------------------------------------------------------------------------------------------------------------------------------------------------------------------------------|
| Physiological/clinical | Muscle and joint symptoms and conditions                                     | New onset or worsening of joint or muscle problems, such as muscle weakness or joint stiffness or swelling/inflammation                                                                                                                                                                                                                                                                                                                                                                                                                                                                                                                                                                                                                      |
| Physiological/clinical | Taste- and/or smell-related functioning, symptoms, and conditions            | New onset or worsening problems with altered or reduced/loss of taste or smell (e.g., familiar things smell or taste bad or different, tasting or smelling things that are not there)                                                                                                                                                                                                                                                                                                                                                                                                                                                                                                                                                        |
| Physiological/clinical | Neuro-cognitive system functioning, symptoms, and conditions                 | New onset or worsening of dizziness/lightheadedness, tics (involuntary movements caused by spasm-like contractions of muscles, most commonly involving the face, mouth, eyes, head, neck or shoulders; vocal tics are sounds uttered unintentionally), fainting, headache, migraine, abnormal movements, tremors/shaking, seizures/fits, muscle twitching, tingling feelings, decreased sensation, inability to move part of the body, lack of coordination, speech difficulty; Problems with memory, communication, concentration, having "brain fog", understanding instructions, including interpretation of words; Abnormal child development (e.g. learning new skills, such as crawling/walking and talking, developmental regression) |
| Physiological/clinical | Mental / Psychological functioning, symptoms, and conditions                 | New onset or worsening problems with emotions and mood, including anxiety/worrying, panic attacks, separation anxiety, fear, aggression, irritability, anger, excessive crying, easily getting upset, feeling of guilt, depression, suicidal thoughts, or post-traumatic stress symptoms (having flashbacks to a stressful event), obsessions (intrusive unwanted thoughts) and compulsions (repetative actions or behaviours linked to obsessions)                                                                                                                                                                                                                                                                                          |
| Physiological/clinical | Kidney and urinary-related functioning, symptoms, and conditions             | New onset or worsening problems with kidney function or need for dialysis or problems with urination (i.e., wee/pee) including infections, burning or stinging, higher frequency or urgency (i.e. feeling of needing), incontinence (inability to control urination/"wetting yourself")                                                                                                                                                                                                                                                                                                                                                                                                                                                      |
| Physiological/clinical | Respiratory functioning, symptoms, and conditions                            | New onset or worsening problems with lungs or breathing (e.g., shortness of breath/shortness of air/not getting enough air, chest tightness or coughing/wheezing, problems with breathing through the nose including blocked and runny nose), sinusitis (infection of the sinuses (air-filled spaces in the bones of your face around the nose))                                                                                                                                                                                                                                                                                                                                                                                             |
| Physiological/clinical | Skin, hair, dental and/or nail-related functioning, symptoms, and conditions | New onset or worsening problems with ulcers, skin rash and/or peeling, itch, red spots or lumps on toes (COVID toes), hair thinning/loss, changes in nails and teeth                                                                                                                                                                                                                                                                                                                                                                                                                                                                                                                                                                         |

|                        |                                                      |                                                                                                                                                                                                                                                                       |
|------------------------|------------------------------------------------------|-----------------------------------------------------------------------------------------------------------------------------------------------------------------------------------------------------------------------------------------------------------------------|
| Physiological/clinical | Post-exertion symptoms                               | New onset or worsening of different symptoms following physical or mental activities or emotions that could previously be tolerated (e.g. thinking, moving, socialising), which that can last for a prolonged duration (multiple days/weeks)                          |
| Physiological/clinical | Vision-related functioning, symptoms, and conditions | New onset or worsening of problems with vision (e.g., problems seeing or blurred vision, increased sensitivity to light, colour misperception, loss of vision), dry eyes or feeling of a grit/sand in eyes                                                            |
| Physiological/clinical | Fever/body temperature changes                       | New onset or worsening of problems related to the body temperature without a known cause (e.g. fever that comes and goes, prolonged low-grade fever, chills or shivers, feeling too cold or too hot)                                                                  |
| Life impact            | Satisfaction with life, or personal enjoyment        | New onset or worsening of problems with satisfaction with life or personal enjoyment, loss of being the person who you were before COVID-19, feeling “left out”/“missing out”, feeling that “the world is moving, while you are stuck”                                |
| Life impact            | Physical functioning, symptoms, and conditions       | New onset or worsening problems with daily physical abilities (activities), including arm/leg shaking or unsteadiness, mobility, walking, dressing, playing or eating, growth                                                                                         |
| Life impact            | Social role-functioning and relationships problems   | New onset or worsening problems with connecting with others, including family members and friends, maintaining and creating new friendships and personal/romantic relationship, social activities                                                                     |
| Life impact            | Work/occupational and study changes                  | New onset or worsening problems with being able to resume usual level of work, study, attendance, less engagement/ participation in extracurricular activities                                                                                                        |
| Life impact            | Stigma                                               | New onset or worsening problems with fear or experiences of being discriminated against, bullied, excluded from activities, ignored, including by employer/school/nursery/university, medical professionals, social groups, family/friends/neighbours, or others      |
| Resource use           | Healthcare resource utilisation                      | Seeing more healthcare professionals (e.g., doctor, physiotherapist, psychologist), taking new medications, returning to the hospital or emergency care, including complementary/alternative medicine (e.g., acupuncturists, naturopaths), medical devices/technology |
| Resource use           | Family/carer burden                                  | Increasing/developing a burden on caregiver/family or friends/classmates/colleagues/teachers; impact of sickness on other people in your life, including relationships between the carers                                                                             |

## 5. FULL DETAILS OF DELPHI PARTICIPANTS.

|                                                                                                                    | Round 1<br><i>n</i> = 214                                                               | Round 2<br><i>n</i> =154 |
|--------------------------------------------------------------------------------------------------------------------|-----------------------------------------------------------------------------------------|--------------------------|
| <b>Stakeholder group, <i>n</i></b>                                                                                 |                                                                                         |                          |
| Children and young people ( $\leq 18$ years old) who have experience of living with Long COVID                     | 26                                                                                      | 21                       |
| Family and carers of children and young people ( $\leq 18$ years old) with Long COVID                              | 115                                                                                     | 76                       |
| Health professionals who have experience treating children and young people ( $\leq 18$ years old) with Long COVID | 37                                                                                      | 32                       |
| Researchers studying Long COVID in children and young people ( $\leq 18$ years old)                                | 36                                                                                      | 25                       |
| Other                                                                                                              | <i>participants reclassified after R1 review and analysed within appropriate groups</i> |                          |
| <b>Gender, <i>n</i></b>                                                                                            |                                                                                         |                          |
| Male                                                                                                               | 47                                                                                      | 34                       |
| Female                                                                                                             | 166                                                                                     | 119                      |
| Non-binary                                                                                                         | 1                                                                                       | 1                        |
| Other                                                                                                              | 0                                                                                       | 0                        |

|                      |    |    |
|----------------------|----|----|
| Prefer not to answer | 0  | 0  |
| <b>Age group, n</b>  |    |    |
| 2-5                  | 1  | 1  |
| 6-11                 | 5  | 2  |
| 12-18                | 21 | 19 |
| 18-29                | 5  | 2  |
| 30-39                | 35 | 31 |
| 40-49                | 94 | 67 |
| 50-59                | 45 | 27 |
| 60-69                | 7  | 4  |
| 70-79                | 1  | 1  |
| >=80                 | 0  | 0  |
| <b>Countries, n</b>  |    |    |

|                |   |   |
|----------------|---|---|
| Argentina      | 2 | 2 |
| Australia      | 7 | 5 |
| Belarus        | 1 | 1 |
| Belgium        | 1 | 1 |
| Canada         | 5 | 1 |
| Chile          | 2 | 2 |
| Croatia        | 2 | 1 |
| Cyprus         | 1 | 1 |
| Czech Republic | 1 | 1 |
| Egypt          | 1 | 1 |
| France         | 5 | 4 |
| Germany        | 2 | 1 |
| Greece         | 2 | 2 |

|             |    |    |
|-------------|----|----|
| Indonesia   | 1  | 0  |
| Ireland     | 3  | 2  |
| Israel      | 1  | 1  |
| Italy       | 6  | 5  |
| Japan       | 1  | 0  |
| Jordan      | 1  | 1  |
| Lithuania   | 1  | 1  |
| Malaysia    | 1  | 1  |
| Netherlands | 10 | 10 |
| New Zealand | 4  | 3  |
| Norway      | 2  | 1  |
| Panama      | 1  | 0  |
| Peru        | 2  | 2  |

|                            |     |     |
|----------------------------|-----|-----|
| Poland                     | 1   | 1   |
| Republic of Korea          | 1   | 1   |
| Romania                    | 3   | 3   |
| Russia                     | 9   | 4   |
| Spain                      | 3   | 1   |
| Sweden                     | 1   | 0   |
| Switzerland                | 1   | 0   |
| Syria                      | 1   | 1   |
| Ukraine                    | 1   | 0   |
| United Kingdom             | 108 | 81  |
| United States of America   | 19  | 12  |
| <b>Ethnicity, <i>n</i></b> |     |     |
| White                      | 180 | 130 |

|                              |                                                                                                                                                                                                                               |                                                                                                                                                         |
|------------------------------|-------------------------------------------------------------------------------------------------------------------------------------------------------------------------------------------------------------------------------|---------------------------------------------------------------------------------------------------------------------------------------------------------|
| South Asian                  | 5                                                                                                                                                                                                                             | 4                                                                                                                                                       |
| Hispanic/Latino/Spanish      | 8                                                                                                                                                                                                                             | 6                                                                                                                                                       |
| East Asian/Pacific Islander  | 5                                                                                                                                                                                                                             | 2                                                                                                                                                       |
| Indigenous peoples           | 0                                                                                                                                                                                                                             | 0                                                                                                                                                       |
| Black                        | 1                                                                                                                                                                                                                             | 1                                                                                                                                                       |
| Middle Eastern/North African | 6                                                                                                                                                                                                                             | 5                                                                                                                                                       |
| Other                        | Mixed Asian = 1<br>Turkish = 1<br>Mixed - English/Pakistani = 1<br>British Indian = 1<br>Indian and West Indian =1<br>Jewish = 1<br>Mix: White British and South Asian = 1<br>This is a continuum. I identify with several =1 | Turkish = 1<br>British Indian = 1<br>Indian and West Indian =1<br>Mixed - English/Pakistani = 1<br>Jewish = 1<br>Mix: White British and South Asian = 1 |



## 6. ATTRITION BETWEEN ROUNDS ONE AND TWO.

| <b>Stakeholder</b>                                                                                                                  | <b>Number registered<br/>n (% of total<br/>registrations)</b> | <b>Completed** R1<br/>n (% of registered)</b> | <b>Number of<br/>participants invited to<br/>R2<br/>n (% of completed R1)</b> | <b>Completed** R2<br/>n (% of completed R1 and<br/>invited to R2)</b> |
|-------------------------------------------------------------------------------------------------------------------------------------|---------------------------------------------------------------|-----------------------------------------------|-------------------------------------------------------------------------------|-----------------------------------------------------------------------|
| <i>CHILDREN AND YOUNG PEOPLE (≤18 YEARS OLD) WHO HAVE EXPERIENCE OF LIVING WITH POST COVID CONDITION (ALSO KNOWN AS LONG COVID)</i> | 30 (12.9)                                                     | 26 (11.4)                                     | 26 (100)                                                                      | 21 (9.8)                                                              |
| <i>FAMILY AND CARERS OF CHILDREN AND YOUNG PEOPLE (≤18 YEARS OLD) WITH LONG COVID</i>                                               | 124 (53.5)                                                    | 115 (50.4)                                    | 115 (100)                                                                     | 76 (35.5)                                                             |
| <i>HEALTH PROFESSIONALS WHO HAVE EXPERIENCE TREATING CHILDREN AND YOUNG PEOPLE (≤18 YEARS OLD) WITH LONG COVID</i>                  | 37 (15.9)                                                     | 37 (16.2)                                     | 37 (100)                                                                      | 32 (15)                                                               |
| <i>RESEARCHERS STUDYING LONG COVID IN CHILDREN AND YOUNG PEOPLE (≤18 YEARS OLD)</i>                                                 | 37 (15.9)                                                     | 36 (15.8)                                     | 36 (100)                                                                      | 25 (11.7)                                                             |

|                                                                                                                                                |            |            |           |          |
|------------------------------------------------------------------------------------------------------------------------------------------------|------------|------------|-----------|----------|
| <b>TOTAL</b>                                                                                                                                   | 228 (98.3) | 214 (93.9) | 214 (100) | 154 (72) |
| <p>*232 total registrations with 1 deleted as duplicate and 3 withdrawn during R1</p> <p>**Completed = completed/rated &gt;50% of outcomes</p> |            |            |           |          |

## 7. RESULTS FOLLOWING TWO ROUNDS OF DELPHI AND SELECTION OF OUTCOMES FOR THE CONSENSUS MEETING

| Domain                 | Outcome                                              | Stakeholder groups voting results |                                                                                       |      |      |               |      |      |        |                                                                                             |      |      |               |      |      |        |                                                                              |      |      |               |    |    |        |
|------------------------|------------------------------------------------------|-----------------------------------|---------------------------------------------------------------------------------------|------|------|---------------|------|------|--------|---------------------------------------------------------------------------------------------|------|------|---------------|------|------|--------|------------------------------------------------------------------------------|------|------|---------------|----|----|--------|
|                        |                                                      | Overall result                    | Children and young people (≤18 years old) with Long COVID and their family and carers |      |      |               |      |      | Result | Health professionals working with children and young people (≤18 years old) with Long COVID |      |      |               |      |      | Result | Researchers studying Long COVID in children and young people (≤18 years old) |      |      |               |    |    | Result |
|                        |                                                      |                                   | Round 1(n=141)                                                                        |      |      | Round 2(n=97) |      |      |        | Round 1(n=37)                                                                               |      |      | Round 2(n=32) |      |      |        | Round 1(n=36)                                                                |      |      | Round 2(n=25) |    |    |        |
|                        |                                                      |                                   | %                                                                                     | %    | %    | %             | %    | %    |        | %                                                                                           | %    | %    | %             | %    | %    |        | %                                                                            | %    | %    | %             | %  | %  |        |
| 1-3                    | 4-6                                                  | 7-9                               | 1-3                                                                                   | 4-6  | 7-9  | 1-3           | 4-6  | 7-9  | 1-3    | 4-6                                                                                         | 7-9  | 1-3  | 4-6           | 7-9  | 1-3  | 4-6    | 7-9                                                                          |      |      |               |    |    |        |
| Mortality/survival     | Survival                                             | Discuss                           | 3.2                                                                                   | 23.8 | 73   | 3.2           | 21.3 | 75.5 | Medium | 19.4                                                                                        | 22.2 | 58.3 | 15.6          | 25   | 59.4 | Medium | 5.7                                                                          | 11.4 | 82.9 | 4             | 8  | 88 | In     |
| Physiological/clinical | Cardiovascular functioning; symptoms; and conditions | In                                | 5.3                                                                                   | 9.8  | 85   | 2.1           | 9.6  | 88.3 | In     | 10.8                                                                                        | 18.9 | 70.3 | 9.4           | 6.3  | 84.4 | In     | 8.3                                                                          | 13.9 | 77.8 | 4             | 8  | 88 | In     |
|                        | Endocrine and metabolic functioning; symptoms;       | Out                               | 6.2                                                                                   | 17.2 | 76.6 | 3.2           | 20.4 | 76.3 | Medium | 10.8                                                                                        | 48.6 | 40.5 | 6.3           | 56.3 | 37.5 | Out    | 13.9                                                                         | 47.2 | 38.9 | 16            | 56 | 28 | Out    |

|  |                                                        |                |      |      |      |      |      |      |            |      |      |      |      |      |      |               |      |      |      |    |    |    |               |
|--|--------------------------------------------------------|----------------|------|------|------|------|------|------|------------|------|------|------|------|------|------|---------------|------|------|------|----|----|----|---------------|
|  | and conditions                                         |                |      |      |      |      |      |      |            |      |      |      |      |      |      |               |      |      |      |    |    |    |               |
|  | Hearing-related functioning; symptoms; and conditions  | <b>Out</b>     | 23·3 | 38·8 | 38   | 22·2 | 51·1 | 26·7 | <b>Out</b> | 29·7 | 43·2 | 27   | 34·4 | 53·1 | 12·5 | <b>Out</b>    | 25·7 | 45·7 | 28·6 | 28 | 56 | 16 | <b>Out</b>    |
|  | Gastrointestinal functioning; symptoms; and conditions | <b>Discuss</b> | 2·2  | 21·3 | 76·5 | 0    | 15·8 | 84·2 | <b>In</b>  | 8·1  | 27   | 64·9 | 6·3  | 12·5 | 81·3 | <b>In</b>     | 11·1 | 50   | 38·9 | 16 | 40 | 44 | <b>Out</b>    |
|  | Pain                                                   | <b>Discuss</b> | 1·4  | 15·9 | 82·6 | 1    | 10·3 | 88·7 | <b>In</b>  | 5·4  | 27   | 67·6 | 3·1  | 9·4  | 87·5 | <b>In</b>     | 11·1 | 27·8 | 61·1 | 4  | 28 | 68 | <b>Medium</b> |
|  | Fatigue or Exhaustion                                  | <b>In</b>      | 0·7  | 3·6  | 95·7 | 0    | 2·1  | 97·9 | <b>In</b>  | 2·7  | 10·8 | 86·5 | 0    | 6·3  | 93·8 | <b>In</b>     | 0    | 19·4 | 80·6 | 0  | 8  | 92 | <b>In</b>     |
|  | Sleep-related functioning; symptoms; and conditions    | <b>Discuss</b> | 0·7  | 17·4 | 81·9 | 0    | 13·5 | 86·5 | <b>In</b>  | 2·7  | 24·3 | 73   | 0    | 15·6 | 84·4 | <b>In</b>     | 2·8  | 38·9 | 58·3 | 4  | 24 | 72 | <b>Medium</b> |
|  | Muscle and joint symptoms and conditions               | <b>Discuss</b> | 3·6  | 23·7 | 72·7 | 0    | 19·8 | 80·2 | <b>In</b>  | 5·4  | 37·8 | 56·8 | 3·1  | 25   | 71·9 | <b>Medium</b> | 5·6  | 38·9 | 55·6 | 8  | 36 | 56 | <b>Medium</b> |
|  | Taste-and/or smell-related functioning; symptoms; and  | <b>Out</b>     | 27·1 | 33·8 | 39·1 | 28   | 47·3 | 24·7 | <b>Out</b> | 16·2 | 35·1 | 48·6 | 21·9 | 40·6 | 37·5 | <b>Out</b>    | 0    | 50   | 50   | 0  | 60 | 40 | <b>Out</b>    |

|                                                                              |         |      |      |      |      |      |      |        |      |      |      |     |      |      |     |      |      |      |      |      |      |     |
|------------------------------------------------------------------------------|---------|------|------|------|------|------|------|--------|------|------|------|-----|------|------|-----|------|------|------|------|------|------|-----|
| conditions                                                                   |         |      |      |      |      |      |      |        |      |      |      |     |      |      |     |      |      |      |      |      |      |     |
| Neuro-cognitive system functioning; symptoms; and conditions                 | In      | 1·5  | 10·9 | 87·6 | 0    | 5·3  | 94·7 | In     | 5·4  | 5·4  | 89·2 | 3·1 | 3·1  | 93·8 | In  | 2·8  | 13·9 | 83·3 | 0    | 4    | 96   | In  |
| Mental / Psychological functioning; symptoms; and conditions                 | Discuss | 6·5  | 19·4 | 74·1 | 4·2  | 16·8 | 78·9 | Medium | 2·7  | 13·5 | 83·8 | 0   | 3·1  | 96·9 | In  | 2·8  | 22·2 | 75   | 0    | 8    | 92   | In  |
| Kidney and urinary-related functioning; symptoms; and conditions             | Out     | 19·7 | 28·3 | 52   | 22·6 | 36·6 | 40·9 | Out    | 29·7 | 45·9 | 24·3 | 25  | 53·1 | 21·9 | Out | 25·7 | 42·9 | 31·4 | 29·2 | 54·2 | 16·7 | Out |
| Respiratory functioning; symptoms; and conditions                            | Discuss | 3·8  | 27·5 | 68·7 | 4·3  | 24·7 | 71   | Medium | 5·4  | 27   | 67·6 | 0   | 18·8 | 81·3 | In  | 0    | 11·1 | 88·9 | 0    | 12   | 88   | In  |
| Skin; hair; dental and/or nail-related functioning; symptoms; and conditions | Out     | 18·3 | 45   | 36·6 | 23·4 | 53·2 | 23·4 | Out    | 24·3 | 48·6 | 27   | 25  | 65·6 | 9·4  | Out | 22·2 | 61·1 | 16·7 | 32   | 60   | 8    | Out |

|             |                                                      |                |      |      |      |      |      |      |        |      |      |      |      |      |      |        |      |      |      |    |      |      |        |
|-------------|------------------------------------------------------|----------------|------|------|------|------|------|------|--------|------|------|------|------|------|------|--------|------|------|------|----|------|------|--------|
|             | Post-exertion symptoms                               | <b>Discuss</b> | 0·7  | 5·8  | 93·5 | 0    | 1    | 99   | In     | 10·8 | 13·5 | 75·7 | 0    | 12·5 | 87·5 | In     | 8·3  | 36·1 | 55·6 | 8  | 24   | 68   | Medium |
|             | Vision-related functioning; symptoms; and conditions | <b>Out</b>     | 10·7 | 35·1 | 54·2 | 12·9 | 38·7 | 48·4 | Out    | 27   | 51·4 | 21·6 | 28·1 | 59·4 | 12·5 | Out    | 27·8 | 44·4 | 27·8 | 28 | 60   | 12   | Out    |
|             | Fever/body temperature changes                       | <b>Out</b>     | 8·2  | 35·8 | 56   | 9·5  | 36·8 | 53·7 | Medium | 21·6 | 54·1 | 24·3 | 12·5 | 75   | 12·5 | Out    | 22·2 | 55·6 | 22·2 | 16 | 76   | 8    | Out    |
| Life impact | Satisfaction with life; or personal enjoyment        | <b>Discuss</b> | 3    | 14·1 | 83   | 0    | 10·3 | 89·7 | In     | 5·4  | 27   | 67·6 | 0    | 25   | 75   | Medium | 0    | 37·1 | 62·9 | 0  | 26·9 | 73·1 | Medium |
|             | Physical functioning; symptoms; and conditions       | <b>In</b>      | 0·7  | 3·7  | 95·6 | 0    | 2·1  | 97·9 | In     | 0    | 10·8 | 89·2 | 0    | 9·4  | 90·6 | In     | 2·9  | 8·6  | 88·6 | 0  | 8    | 92   | In     |
|             | Social role-functioning and relationships problems   | <b>Discuss</b> | 5·3  | 28·6 | 66·2 | 1    | 32   | 67   | Medium | 2·8  | 22·2 | 75   | 0    | 12·9 | 87·1 | In     | 0    | 31·4 | 68·6 | 4  | 32   | 64   | Medium |
|             | Work/occupational and study changes                  | <b>Discuss</b> | 2·3  | 14·3 | 83·5 | 0    | 12·2 | 87·8 | In     | 2·8  | 16·7 | 80·6 | 0    | 12·9 | 87·1 | In     | 2·9  | 25·7 | 71·4 | 0  | 24   | 76   | Medium |
|             | Stigma                                               | <b>Out</b>     | 9·2  | 41·2 | 49·6 | 7·2  | 41·2 | 51·5 | Medium | 5·7  | 57·1 | 37·1 | 6·5  | 61·3 | 32·3 | Out    | 17·1 | 48·6 | 34·3 | 16 | 68   | 16   | Out    |

|              |                                 |                      |     |      |      |   |      |      |        |     |      |      |   |      |      |        |     |      |      |     |      |      |        |
|--------------|---------------------------------|----------------------|-----|------|------|---|------|------|--------|-----|------|------|---|------|------|--------|-----|------|------|-----|------|------|--------|
|              |                                 |                      |     |      |      |   |      |      | m      |     |      |      |   |      |      |        |     |      |      |     |      |      |        |
| Resource use | Healthcare resource utilisation | Query discuss at end | 2.9 | 18.4 | 78.7 | 2 | 20.4 | 77.6 | Medium | 0   | 36.1 | 63.9 | 0 | 37.5 | 62.5 | Medium | 8.6 | 17.1 | 74.3 | 7.7 | 19.2 | 73.1 | Medium |
|              | Family/carer burden             | Query discuss at end | 1.5 | 29.6 | 68.9 | 0 | 21.9 | 78.1 | Medium | 2.8 | 22.2 | 75   | 0 | 28.1 | 71.9 | Medium | 0   | 31.4 | 68.6 | 0   | 24   | 76   | Medium |

|                             |  |           |
|-----------------------------|--|-----------|
| <b>Total</b>                |  |           |
| <b>In</b>                   |  | <b>4</b>  |
| <b>Out</b>                  |  | <b>8</b>  |
| <b>Discuss</b>              |  | <b>11</b> |
| <b>Query discuss at end</b> |  | <b>2</b>  |

## 8. DELPHI PROCESS AND CONSENSUS MEETING RESULTS

| Domain                           | Outcome                                                             | Outcome description                                                                                                                                                                 | % Children and young people/Family and carers of children and young people (≤18 years old) with Long COVID voting 7-9 in R2 of online Delphi | % HCPs voting 7-9 in R2 of online Delphi | Researchers voting 7-9 in R2 of online Delphi | % Children and young people/Family and carers of children and young people (≤18 years old) with Long COVID voting 7-9 in consensus meeting | % HCPs/ Researchers voting 7-9 in consensus meeting | Result                                      |
|----------------------------------|---------------------------------------------------------------------|-------------------------------------------------------------------------------------------------------------------------------------------------------------------------------------|----------------------------------------------------------------------------------------------------------------------------------------------|------------------------------------------|-----------------------------------------------|--------------------------------------------------------------------------------------------------------------------------------------------|-----------------------------------------------------|---------------------------------------------|
| Physiologic al/clinical outcomes | <b>Fatigue or Exhaustion</b>                                        | New onset or worsening of feeling exhausted, having too little energy, or needing more rest, including fatigue not relieved by rest                                                 | 97·9                                                                                                                                         | 93·8                                     | 92                                            | N/A                                                                                                                                        | N/A                                                 | Included in the COS following Delphi survey |
|                                  | <b>Neuro-cognitive system functioning, symptoms, and conditions</b> | New onset or worsening of dizziness/lightheadedness, tics (involuntary movements caused by spasm-like contractions of muscles, most commonly involving the face, mouth, eyes, head, | 94·7                                                                                                                                         | 93·8                                     | 96                                            | N/A                                                                                                                                        | N/A                                                 | Included in the COS following Delphi survey |

|  |                                    |                                                                                                                                                                                                                                                                                                                                                                                                                                                                                                                                                          |      |      |    |     |     |                     |
|--|------------------------------------|----------------------------------------------------------------------------------------------------------------------------------------------------------------------------------------------------------------------------------------------------------------------------------------------------------------------------------------------------------------------------------------------------------------------------------------------------------------------------------------------------------------------------------------------------------|------|------|----|-----|-----|---------------------|
|  |                                    | neck or shoulders; vocal tics are sounds uttered unintentionally), fainting, headache, migraine, abnormal movements, tremors/shaking, seizures/fits, muscle twitching, tingling feelings, decreased sensation, inability to move part of the body, lack of coordination, speech difficulty; Problems with memory, communication, concentration, having "brain fog", understanding instructions, including interpretation of words; Abnormal child development (e.g. learning new skills, such as crawling/walking and talking, developmental regression) |      |      |    |     |     |                     |
|  | <b>Cardiovascular functioning,</b> | New onset or worsening of                                                                                                                                                                                                                                                                                                                                                                                                                                                                                                                                | 88·3 | 84·4 | 88 | N/A | N/A | Included in the COS |



|                                      |                                                       |                                                                                                                                                                                                                                                                     |      |      |    |     |     |                                                                   |
|--------------------------------------|-------------------------------------------------------|---------------------------------------------------------------------------------------------------------------------------------------------------------------------------------------------------------------------------------------------------------------------|------|------|----|-----|-----|-------------------------------------------------------------------|
|                                      | <b>symptoms, and conditions</b>                       | problems affecting the heart (e.g. irregular heartbeat, palpitations, pounding or racing heartbeat, resting heartbeat changes, pericarditis/myocarditis (heart inflammation)); problems with the blood vessels (i.e., veins or arteries), changes in blood pressure |      |      |    |     |     | following Delphi survey                                           |
| <b>Life impact outcomes</b>          | <b>Physical functioning, symptoms, and conditions</b> | New onset or worsening problems with daily physical abilities (activities), including arm/leg shaking or unsteadiness, mobility, walking, dressing, playing or eating, growth                                                                                       | 97.9 | 90.6 | 92 | N/A | N/A | Included in the COS following Delphi survey                       |
| <b>Physiologic/clinical outcomes</b> | <b>Post-exertion symptoms</b>                         | New onset or worsening of different symptoms following physical or mental activities or emotions that could previously be tolerated (e.g. thinking, moving, socialising), which                                                                                     | 99   | 87.5 | 68 | 100 | 84  | Included in the COS following discussion at the consensus meeting |

|                             |                                                               |                                                                                                                                                                                                                                                                                                                                                           |      |      |    |     |    |                                                                   |
|-----------------------------|---------------------------------------------------------------|-----------------------------------------------------------------------------------------------------------------------------------------------------------------------------------------------------------------------------------------------------------------------------------------------------------------------------------------------------------|------|------|----|-----|----|-------------------------------------------------------------------|
|                             |                                                               | that can last for a prolonged duration (multiple days/weeks)                                                                                                                                                                                                                                                                                              |      |      |    |     |    |                                                                   |
|                             | <b>Gastrointestinal functioning; symptoms; and conditions</b> | New onset or worsening of problems with swallowing, stomach aches, nausea (feeling the need to vomit), vomiting, heartburn/reflux (stomach acid coming back up into the mouth and causing an unpleasant, sour taste), diarrhoea, constipation, gas, indigestion, lack of pleasure while eating (some children describe this as “food and eating is yuck”) | 84·2 | 81·3 | 44 | 100 | 84 | Included in the COS following discussion at the consensus meeting |
| <b>Life impact outcomes</b> | <b>Work/occupational and study changes</b>                    | New onset or worsening problems with being able to resume usual level of work, study, attendance, less engagement/participation in                                                                                                                                                                                                                        | 87·8 | 87·1 | 76 | 100 | 91 | Included in the COS following discussion at the consensus meeting |

|                                         |                                                                          | extracurricular activities                                                                                                                                                                                                                                                      |      |      |    |     |     |                                  |
|-----------------------------------------|--------------------------------------------------------------------------|---------------------------------------------------------------------------------------------------------------------------------------------------------------------------------------------------------------------------------------------------------------------------------|------|------|----|-----|-----|----------------------------------|
| <b>Physiologic al/clinical outcomes</b> | <b>Endocrine and metabolic functioning, symptoms, and conditions</b>     | New onset or worsening of problems related to the glands (type of body organ) that make hormones, hormonal balance (e.g. diabetes, thyroid problems, adrenal gland or steroid problems, changes in body weight, bone mineral problems), menstrual cycle, early onset of puberty | 76.3 | 37.5 | 28 | N/A | N/A | Excluded following Delphi survey |
|                                         | <b>Hearing-related functioning, symptoms, and conditions</b>             | New onset or worsening of problems with hearing (e.g., hearing loss, ringing or buzzing in the ears, increased sensitivity to sounds)                                                                                                                                           | 26.7 | 12.5 | 16 | N/A | N/A | Excluded following Delphi survey |
|                                         | <b>Taste- and/or smell-related functioning, symptoms, and conditions</b> | New onset or worsening problems with altered or reduced/loss of taste or smell (e.g., familiar things                                                                                                                                                                           | 24.7 | 37.5 | 40 | N/A | N/A | Excluded following Delphi survey |

|  |                                                                                     |                                                                                                                                                                                                                                                                                         |      |      |      |     |     |                                  |
|--|-------------------------------------------------------------------------------------|-----------------------------------------------------------------------------------------------------------------------------------------------------------------------------------------------------------------------------------------------------------------------------------------|------|------|------|-----|-----|----------------------------------|
|  |                                                                                     | smell or taste bad or different, tasting or smelling things that are not there)                                                                                                                                                                                                         |      |      |      |     |     |                                  |
|  | <b>Kidney and urinary-related functioning, symptoms, and conditions</b>             | New onset or worsening problems with kidney function or need for dialysis or problems with urination (i.e., wee/pee) including infections, burning or stinging, higher frequency or urgency (i.e. feeling of needing), incontinence (inability to control urination/“wetting yourself”) | 40·9 | 21·9 | 16·7 | N/A | N/A | Excluded following Delphi survey |
|  | <b>Skin, hair, dental and/or nail-related functioning, symptoms, and conditions</b> | New onset or worsening problems with ulcers, skin rash and/or peeling, itch, red spots or lumps on toes (COVID toes), hair thinning/loss, changes in nails and teeth                                                                                                                    | 23·4 | 9·4  | 8    | N/A | N/A | Excluded following Delphi survey |
|  | <b>Vision-related functioning,</b>                                                  | New onset or worsening of problems with vision (e.g.,                                                                                                                                                                                                                                   | 48·4 | 12·5 | 12   | N/A | N/A | Excluded following               |

|                             |                                       |                                                                                                                                                                                                                             |      |      |    |     |     |                                  |
|-----------------------------|---------------------------------------|-----------------------------------------------------------------------------------------------------------------------------------------------------------------------------------------------------------------------------|------|------|----|-----|-----|----------------------------------|
|                             | <b>symptoms, and conditions*</b>      | problems seeing or blurred vision, increased sensitivity to light, colour misperception, loss of vision), dry eyes or feeling of a grit/sand in eyes                                                                        |      |      |    |     |     | Delphi survey                    |
|                             | <b>Fever/body temperature changes</b> | New onset or worsening of problems related to the body temperature without a known cause (e.g. fever that comes and goes, prolonged low-grade fever, chills or shivers, feeling too cold or too hot)                        | 53·7 | 12·5 | 8  | N/A | N/A | Excluded following Delphi survey |
| <b>Life impact outcomes</b> | <b>Stigma</b>                         | New onset or worsening problems with fear or experiences of being discriminated against, bullied, excluded from activities, ignored, including by employer/school/nursery/university, medical professionals, social groups, | 51·5 | 32·3 | 16 | N/A | N/A | Excluded following Delphi survey |

|                                         |                                                            |                                                                                                                                                                                                                  |      |      |    |    |    |                                                        |
|-----------------------------------------|------------------------------------------------------------|------------------------------------------------------------------------------------------------------------------------------------------------------------------------------------------------------------------|------|------|----|----|----|--------------------------------------------------------|
|                                         |                                                            | family/friends/neighbours, or others                                                                                                                                                                             |      |      |    |    |    |                                                        |
| <b>Mortality outcomes</b>               | <b>Survival</b>                                            | How long does someone live                                                                                                                                                                                       | 75.5 | 59.4 | 88 | 27 | 8  | Excluded following discussion at the consensus meeting |
| <b>Physiologic al/clinical outcomes</b> | <b>Sleep-related functioning; symptoms; and conditions</b> | New onset or worsening of problems with falling or staying asleep, need for sleep medications/aids, excessive sleeping, or lack of refreshing sleep/poor sleep quality, increased nightmares and/or sleepwalking | 86.5 | 84.4 | 72 | 91 | 75 | Excluded following discussion at the consensus meeting |
|                                         | <b>Muscle and joint symptoms and conditions</b>            | New onset or worsening of joint or muscle problems, such as                                                                                                                                                      | 80.2 | 71.9 | 56 | 72 | 34 | Excluded following discussion at the                   |

|  |                                           |                                                                                                                                                                                                                                                                                                                                                                                                                                                     |      |      |    |    |    |                                                        |
|--|-------------------------------------------|-----------------------------------------------------------------------------------------------------------------------------------------------------------------------------------------------------------------------------------------------------------------------------------------------------------------------------------------------------------------------------------------------------------------------------------------------------|------|------|----|----|----|--------------------------------------------------------|
|  |                                           | muscle weakness or joint stiffness or swelling/inflammation                                                                                                                                                                                                                                                                                                                                                                                         |      |      |    |    |    | consensus meeting                                      |
|  | <b>Mental Psychological functioning</b> / | New onset or worsening problems with emotions and mood, including anxiety/worrying, panic attacks, separation anxiety, fear, aggression, irritability, anger, excessive crying, easily getting upset, feeling of guilt, depression, suicidal thoughts, or post-traumatic stress symptoms (having flashbacks to a stressful event), obsessions (intrusive unwanted thoughts) and compulsions (repetative actions or behaviours linked to obsessions) | 78.9 | 96.9 | 92 | 10 | 59 | Excluded following discussion at the consensus meeting |
|  | <b>Respiratory functioning</b>            | New onset or worsening problems with lungs or breathing (e.g., shortness of                                                                                                                                                                                                                                                                                                                                                                         | 71   | 81.3 | 88 | 45 | 66 | Excluded following discussion at the                   |

|  |             |                                                                                                                                                                                                                                                                                                                                                                      |      |      |    |    |    |                                                        |
|--|-------------|----------------------------------------------------------------------------------------------------------------------------------------------------------------------------------------------------------------------------------------------------------------------------------------------------------------------------------------------------------------------|------|------|----|----|----|--------------------------------------------------------|
|  |             | breath/shortness of air/not getting enough air, chest tightness or coughing/wheezing, problems with breathing through the nose including blocked and runny nose), sinusitis (infection of the sinuses (air-filled spaces in the bones of your face around the nose))                                                                                                 |      |      |    |    |    | consensus meeting                                      |
|  | <b>Pain</b> | New onset or worsening discomfort in the body that can include sharp or burning pain, dull ache, or stinging or throbbing, including pain that comes and goes, or is persistent, or chronic (ongoing) pain; increased sensitivity to pain (feeling pain even upon minor stimuli which have not caused pain before), inability to control pain with usual painkillers | 88.7 | 87.5 | 68 | 80 | 75 | Excluded following discussion at the consensus meeting |



|                              |                                                           |                                                                                                                                                                                                                                        |      |      |      |     |    |                                                        |
|------------------------------|-----------------------------------------------------------|----------------------------------------------------------------------------------------------------------------------------------------------------------------------------------------------------------------------------------------|------|------|------|-----|----|--------------------------------------------------------|
| <b>Life impact outcomes</b>  | <b>Satisfaction with life; or personal enjoyment</b>      | New onset or worsening of problems with satisfaction with life or personal enjoyment, loss of being the person who you were before COVID-19, feeling “left out”/“missing out”, feeling that “the world is moving, while you are stuck” | 89·7 | 75   | 73·1 | 63  | 34 | Excluded following discussion at the consensus meeting |
|                              | <b>Social role-functioning and relationships problems</b> | New onset or worsening problems with connecting with others, including family members and friends, maintaining and creating new friendships and personal/romantic relationship, social activities                                      | 67   | 87·1 | 64   | 27  | 18 | Excluded following discussion at the consensus meeting |
| <b>Resource Use Outcomes</b> | <b>Family/carer burden</b>                                | Increasing/developing a burden on caregiver/family or friends/classmates /colleagues/teachers; impact of sickness on other people in your life, including                                                                              | 78·1 | 71·9 | 76   | 100 | 34 | Excluded following discussion at the consensus meeting |

|  |                                        |                                                                                                                                                                                                                                                                       |      |      |      |    |   |                                                         |
|--|----------------------------------------|-----------------------------------------------------------------------------------------------------------------------------------------------------------------------------------------------------------------------------------------------------------------------|------|------|------|----|---|---------------------------------------------------------|
|  |                                        | relationships between the carers                                                                                                                                                                                                                                      |      |      |      |    |   |                                                         |
|  | <b>Healthcare resource utilisation</b> | Seeing more healthcare professionals (e.g., doctor, physiotherapist, psychologist), taking new medications, returning to the hospital or emergency care, including complementary/alternative medicine (e.g., acupuncturists, naturopaths), medical devices/technology | 77.6 | 62.5 | 73.1 | 44 | 8 | Excluded following discussions at the consensus meeting |

## 9. PC-COS CHILDREN PROJECT STEERING COMMITTEE GROUP AUTHORS

ASIAH KASSIM<sup>1</sup>, JENNIFER R. CHEVINSKY<sup>2</sup>, KAREN CHOONG<sup>3</sup>, RAE DUNCAN<sup>4</sup>, SUSANNA ESPOSITO<sup>5</sup>, REBECCA FOSTER<sup>6</sup>, ALLA GUEKHT<sup>7</sup>, ALLISON JAURE<sup>8</sup>, CARRIE MACKENZIE<sup>9</sup>, VIVIENNE MATTHIES-BONN<sup>10</sup>, KAREN MATVIENKO-SIKAR<sup>11</sup>, LORRAINE MCCLOUD<sup>12</sup>, DONNA C MCPARLAND<sup>12</sup>, VICTOR DANIEL MIRON<sup>13</sup>, SRINIVAS MURTHY<sup>14</sup>, SARAH O CONNELL<sup>12</sup>, MARGARET O'HARA<sup>15</sup>, ANNA OGWONOWSKA-SLODOWNIK<sup>16</sup>, JANA PAVARE<sup>17</sup>, PAULA ROBERTSON<sup>18</sup>, JEREMY ROSSMAN<sup>19</sup>, OANA SĂNDULESCU<sup>20</sup>, SHARON H. SAYDAH<sup>21</sup>, JOCHEN SCHMITT<sup>22</sup>, MALCOLM "CALUM" G. SEMPLE<sup>23,24</sup>, ROZ SHAFRAN<sup>25</sup>, AUSRA SNIPAITIENE<sup>26</sup>, ARNE SØRAAS<sup>27</sup>, TERENCE STEPHENSON<sup>28</sup>, LOLA TULEN<sup>29</sup>, GONZALO VALENZUELA GALAZ<sup>30</sup>, DAVID VICKERS<sup>31</sup>, DANIEL CHRISTIAN VILSER<sup>32</sup>, MICHAELA WAAK<sup>33</sup>, JULIE WELLS<sup>12</sup>, ELIZABETH WHITTAKER<sup>34,35</sup>, MICHELLE WINER<sup>12</sup>, ALAN ASMANOV<sup>36</sup>, PASQUALE COMBERIATI<sup>37</sup>

<sup>1</sup> Hospital Tunku Azizah, (Women and Children Hospital), Kuala Lumpur, Malaysia

<sup>2</sup> CDC COVID-19 Emergency Response, USA

- 3 McMaster University, Hamilton, Canada
- 4 Newcastle's Freeman Hospital, Newcastle upon Tyne, UK
- 5 University of Parma, Parma, Italy
- 6 Royal Surrey Hospital, Guildford , UK
- 7 Moscow Research and Clinical Centre for Neuropsychiatry, Moscow, Russia
- 8 The University of Sydney, Sydney, Australia
- 9 Sheffield Children's NHS Foundation Trust, Sheffield, UK
- 10 Long Covid kinderen, the Netherlands
- 11 University College Cork, Cork, Ireland
- 12 Long Covid Kids
- 13 Carol Davila University of Medicine and Pharmacy, Bucharest, Romania
- 14 University of British Columbia, Vancouver, Canada
- 15 Long Covid Support, London, UK
- 16 Faculty of Rehabilitation, Jozef Pilsudski University of Physical Education in Warsaw, Warsaw, Poland
- 17 Riga Stradins University, Riga, Latvia
- 18 Paediatric Emergency Department at Eric Williams Medical Complex, Trinidad and Tobago
- 19 University of Kent, Canterbury, UK
- 20 Department of Infectious Diseases I, Faculty of Medicine, Carol Davila University of Medicine and Pharmacy, Bucharest, Romania and National Institute for Infectious Diseases "Prof. Dr. Matei Balș", Bucharest, Romania
- 21 CDC/DDID/NCIRD/CORVD; CDC COVID-19 Response, USA
- 22 Center for Evidence-based Healthcare, Medical Faculty Carl Gustav Carus, TU Dresden, Dresden, Germany
- 23 University of Liverpool, Liverpool, UK

- 24 Alder Hey Children's Hospital, Liverpool, UK
- 25 UCL Great Ormond Street Institute of Child Health, London, UK
- 26 Lithuanian University of Health Sciences Pediatric Department, Kaunas, Lithuania
- 27 Oslo University Hospital, Oslo, Norway
- 28 University College London, London, UK
- 29 National Institute for Public Health and the Environment, Bilthoven, the Netherlands
- 30 Department of Paediatric Infectious Diseases and Immunology, Pontifical Catholic University of Chile, Santiago, Chile.
- 31 Cambridgeshire Community Services NHS Trust, Cambridgeshire, UK
- 32 Hospital for Pediatrics and Adolescent Medicine, Jena University Hospital, Jena, Germany
- 33 The University of Queensland, Brisbane, Australia
- 34 Section of Paediatric Infectious Diseases, Imperial College London, London, UK
- 35 Department of Paediatric Infectious Diseases, Imperial College Healthcare NHS Trust, London, UK
- 36 The Research and Clinical Institute for Pediatrics named after Academician Yuri Veltishev of the Pirogov Russian National Research Medical University, Moscow, Russia
- 37 Department of Clinical and Experimental Medicine, Section of Pediatrics, University of Pisa, Italy

#### 10. PC-COS CHILDREN PROJECT STEERING COMMITTEE (TABLE)

| Name, Middle name | Surname | Institution                                                                                                                                                                                                                        | Country   | Expertise                             |
|-------------------|---------|------------------------------------------------------------------------------------------------------------------------------------------------------------------------------------------------------------------------------------|-----------|---------------------------------------|
| EUROPEAN REGION   |         |                                                                                                                                                                                                                                    |           |                                       |
| Daniel            | Munblit | Division of Care in Long Term Conditions, Florence Nightingale Faculty of Nursing, Midwifery and Palliative Care, King's College London/Department of Paediatrics and Paediatric Infectious Diseases, Institute of Child's Health, | UK/Russia | Allergy, Paediatrics, COS development |

|           |                    |                                                                                                                                                                                    |                 |                                                                                                                                                           |
|-----------|--------------------|------------------------------------------------------------------------------------------------------------------------------------------------------------------------------------|-----------------|-----------------------------------------------------------------------------------------------------------------------------------------------------------|
|           |                    | Sechenov First Moscow State Medical University (Sechenov University)/Research and Clinical Center for Neuropsychiatry                                                              |                 |                                                                                                                                                           |
| Anastasia | Chernyavskaya      | Department of Paediatrics and Paediatric Rheumatology, Sechenov First Moscow State Medical University (Sechenov University)/National Medical Research Center for Children's Health | Russia          | Paediatrics                                                                                                                                               |
| Nina      | Seylanova          | Independent researcher                                                                                                                                                             | UK              | Critical Care, COS development                                                                                                                            |
| Olalekan  | Aiyegbusi          | University of Birmingham                                                                                                                                                           | UK              | Outcomes Methodology                                                                                                                                      |
| Anbarasu  | Anbu               | Alder Hey Children's NHS Foundation Trust                                                                                                                                          | UK              | Lead for CYP Long Covid and ME/CFS service at Alder Hey Children's NHS Foundation Trust Hub                                                               |
| Christian | Apfelbacher        | University of Magdeburg                                                                                                                                                            | Germany         | Epidemiology, COS development                                                                                                                             |
| Liat      | Ashkenazi-Hoffnung | Schneider Children's Medical Center of Israel                                                                                                                                      | Israel          | Pediatric Infectious Diseases                                                                                                                             |
| Caroline  | Brackel            | Amsterdam University Medical Centers/Department of Pediatrics, Tergooi Hospital                                                                                                    | The Netherlands | Paediatric Pulmonology                                                                                                                                    |
| Danilo    | Buonsenso          | Università Cattolica del Sacro Cuore/Department of Woman and Child Health and Public Health, Fondazione Policlinico Universitario A. Gemelli IRCCS                                 | Italy           | Paediatrics, Infectious Diseases                                                                                                                          |
| Pasquale  | Comberiati         | Department of Clinical and Experimental Medicine, Section of Pediatrics, University of Pisa                                                                                        | Italy           | Paediatrics, Allergy                                                                                                                                      |
| Daniele   | Dona'              | Department for Women's and Children's Health, University of Padua                                                                                                                  | Italy           | Pediatric Infectious Diseases Consultant, co-leader of the Clinical Working Group of the VERDI project (101045989), which is funded by the European Union |

|           |            |                                                                                               |                 |                                                                                                                                                                                                                            |
|-----------|------------|-----------------------------------------------------------------------------------------------|-----------------|----------------------------------------------------------------------------------------------------------------------------------------------------------------------------------------------------------------------------|
| Audrey    | DunnGalvin | University of Cork                                                                            | Ireland         | Psychology                                                                                                                                                                                                                 |
| Jon       | Genuneit   | Pediatric Epidemiology, Department of Pediatrics, Medical Faculty, Leipzig University         | Germany         | Immunology                                                                                                                                                                                                                 |
| Helen     | Goss       | Long Covid Kids                                                                               | UK              | Family member of a person with living experience of Long COVID                                                                                                                                                             |
| Sarah E.  | Hughes     | Institute of Applied Health Research, University of Birmingham                                | UK              | Outcomes Methodology                                                                                                                                                                                                       |
| Christina | Jones      | University of Surrey                                                                          | UK              | Adherence, Allergy, Asthma, Behaviour change, Diabetes, Evidence synthesis, Health services research, Long term conditions, Physical and psychological health comorbidities, Psychological interventions, Research methods |
| Sammie    | McFarland  | Long Covid Kids                                                                               | UK              | Family member of a person with living experience of Long COVID                                                                                                                                                             |
| Timothy R | Nicholson  | King's College London                                                                         | UK              | Neuropsychiatry                                                                                                                                                                                                            |
| Terry     | Segal      | University College London Hospitals NHS Foundation Trust                                      | UK              | Adolescence, paediatric endocrinology (growth and puberty), chronic fatigue syndrome, obesity, anorexia nervosa (medical aspects), chronic medically unexplained symptoms                                                  |
| Louise    | Sigfrid    | University of Oxford                                                                          | UK              | Public Health, Infectious diseases                                                                                                                                                                                         |
| Claire    | Thorne     | Population, Policy and Practice Dept, University College London GOS Institute of Child Health | UK              | Infectious diseases epidemiology                                                                                                                                                                                           |
| Susanne   | Vijverberg | Amsterdam University Medical Centers                                                          | The Netherlands | Paediatric asthma                                                                                                                                                                                                          |
| John O.   | Warner     | Imperial College London                                                                       | UK              | Allergy, Respiratory, Pediatrics                                                                                                                                                                                           |

|               |                     |                                                                                       |                 |                                                                |
|---------------|---------------------|---------------------------------------------------------------------------------------|-----------------|----------------------------------------------------------------|
| Paula R       | Williamson          | University of Liverpool                                                               | UK              | Methodology, COS development                                   |
| Sarah O       | Connell             | Long Covid Kids                                                                       | UK              | Family member of a person with living experience of Long COVID |
| Rae           | Duncan              | Newcastle's Freeman Hospital                                                          | UK              | Cardiology, LCK (PPI)                                          |
| Susanna       | Esposito            | University of Parma                                                                   | Italy           | Paediatrics, Infectious Diseases                               |
| Rebecca       | Foster              | Sherwood Forest Hospitals Foundation Trust                                            | UK              | Paediatrics                                                    |
| Alla          | Guekht              | Moscow Research and Clinical Centre for Neuropsychiatry                               | Russia          | Neurology                                                      |
| Carrie        | Mackenzie           | Sheffield Children's NHS Foundation Trust                                             | UK              | Paediatrics                                                    |
| Vivienne      | Matthies-Bonn       | Long Covid kinderen                                                                   | the Netherlands | Family member of a person with living experience of Long COVID |
| Karen         | Matvienko-Sikar     | University of Cork                                                                    | Ireland         | COS development                                                |
| Lorraine      | McCloud             | Long Covid Kids                                                                       | UK              | Family member of a person with living experience of Long COVID |
| Donna C       | McParland           | Long Covid Kids                                                                       | UK              | Family member of a person with living experience of Long COVID |
| Victor Daniel | Miron               | Carol Davila University of Medicine and Pharmacy                                      | Romania         | Paediatrics, Infectious Diseases                               |
| Margaret      | O'Hara              | Long Covid Support                                                                    | UK              | Patient and Public Involvement in Research                     |
| Anna          | Ogonowska-Slodownik | Faculty of Rehabilitation, Jozef Pilsudski University of Physical Education in Warsaw | Poland          | Physiotherapy and physical education                           |
| Jana          | Pavare              | Riga Stradins University                                                              | Latvia          | Paediatrics, Infectious Diseases                               |
| Jeremy        | Rossmann            | University of Kent                                                                    | UK              | Virology, Public Health                                        |

|                        |                   |                                                                                                                                                        |                 |                                                                |
|------------------------|-------------------|--------------------------------------------------------------------------------------------------------------------------------------------------------|-----------------|----------------------------------------------------------------|
| Oana                   | Sandulescu        | Department of Infectious Diseases, Faculty of Medicine, Carol Davila University of Medicine and Pharmacy                                               | Romania         | Infectious Diseases                                            |
| Jochen                 | Schmitt           | University of Dresden                                                                                                                                  | Germany         | Methodology, COS development                                   |
| Malcolm "Calum" G.     | Semple            | University of Liverpool/Alder Hey Children's Hospital                                                                                                  | UK              | Infectious Diseases                                            |
| Roz                    | Shafran           | UCL GOS Institute of Child Health                                                                                                                      | UK              | Population, Policy & Practice Dept                             |
| Ausra                  | Snipaitiene       | Lithuanian University of Health Sciences Pediatric Department                                                                                          | Lithuania       | Paediatrics, Rheumatology                                      |
| Arne                   | Søraas            | Oslo University Hospital                                                                                                                               | Norway          | Bacteriology                                                   |
| Terence                | Stephenson        | University College London                                                                                                                              | UK              | Paediatrics                                                    |
| Lola                   | Tulen             | National Institute for Public Health and the Environment                                                                                               | the Netherlands | Epidemiology                                                   |
| Kees                   | van den Wijngaard | National Institute for Public Health and the Environment                                                                                               | the Netherlands | Epidemiology                                                   |
| David                  | Vickers           | Cambridgeshire Community Services NHS Trust                                                                                                            | UK              | Paediatrics                                                    |
| Daniel Christian       | Vilser            | Hospital for Pediatrics and Adolescent Medicine, Jena University Hospital                                                                              | Germany         | Pediatric Cardiology, Pediatric Emergency Medicine             |
| Julie                  | Wells             | Long Covid Kids                                                                                                                                        | UK              | Family member of a person with living experience of Long COVID |
| Elizabeth              | Whittaker         | Imperial College London                                                                                                                                | UK              | Paediatrics, Infectious Diseases                               |
| Alan                   | Asmanov           | The Research and Clinical Institute for Pediatrics named after Academician Yuri Veltischev of the Pirogov Russian National Research Medical University | Russia          | Pediatrics, ENT                                                |
| REGION OF THE AMERICAS |                   |                                                                                                                                                        |                 |                                                                |



|                        |                  |                                                                                                                                                                                                                                                                                          |                     |                                                                |
|------------------------|------------------|------------------------------------------------------------------------------------------------------------------------------------------------------------------------------------------------------------------------------------------------------------------------------------------|---------------------|----------------------------------------------------------------|
| Dale M.                | Needham          | Outcomes After Critical Illness and Surgery (OACIS) Research Group, Johns Hopkins University/Pulmonary and Critical Care Medicine, Department of Medicine, Johns Hopkins University School of Medicine/Physical Medicine and Rehabilitation, Johns Hopkins University School of Medicine | USA                 | Critical Care, Physical Medicine and Rehabilitation            |
| Nikita                 | Nekliudov        | Institute for Health Metrics and Evaluation, University of Washington                                                                                                                                                                                                                    | USA                 | Health Services Research                                       |
| Carlos                 | Oliveira         | Yale University School of Medicine, Department of Pediatrics, Section of Infectious Diseases/Yale University School of Public Health, Department of Biostatistics, Division of Health Informatics/Yale New Haven Children's Hospital                                                     | USA                 | Paediatric infectious diseases                                 |
| Laura                  | Malone           | Kennedy Krieger Institute/Johns Hopkins University                                                                                                                                                                                                                                       | USA                 | Paediatric long COVID                                          |
| Jennifer R.            | Chevinsky        | CDC COVID-19 Emergency Response                                                                                                                                                                                                                                                          | USA                 | Epidemiology, Population Health, Preventive Medicine           |
| Karen                  | Choong           | McMaster University                                                                                                                                                                                                                                                                      | Canada              | Paediatrics                                                    |
| Sharon H.              | Saydah           | CDC/DDID/NCIRD/DVD; CDC COVID-19 Response                                                                                                                                                                                                                                                | USA                 | Epidemiology                                                   |
| Michelle               | Winer            | Long Covid Kids                                                                                                                                                                                                                                                                          | USA                 | Family member of a person with living experience of Long COVID |
| Srinivas               | Murthy           | University of British Columbia                                                                                                                                                                                                                                                           | Canada              | Critical Care, Paediatrics, Infectious Diseases                |
| Paula                  | Robertson        | Paediatric Emergency Department at Eric Williams Medical Complex                                                                                                                                                                                                                         | Trinidad and Tobago | Paediatrics                                                    |
| Gonzalo                | Valenzuela Galaz | Pontifical Catholic University of Chile                                                                                                                                                                                                                                                  | Chile               | Paediatrics, Infectious Diseases                               |
| WESTERN PACIFIC REGION |                  |                                                                                                                                                                                                                                                                                          |                     |                                                                |
| Asiah                  | Kassim           | Kuala Lumpur Women and Children Hospital                                                                                                                                                                                                                                                 | Malaysia            | Paediatrics                                                    |

|                              |             |                                                                                                                                      |             |                                                                      |
|------------------------------|-------------|--------------------------------------------------------------------------------------------------------------------------------------|-------------|----------------------------------------------------------------------|
| Allison                      | Jaure       | The University of Sydney                                                                                                             | Australia   | Chronic Disease, COS development                                     |
| Michaela                     | Waak        | The University of Queensland                                                                                                         | Australia   | Paediatrics, Neurology, Paediatric intensive care/Retrieval medicine |
| EASTERN MEDITERRANEAN REGION |             |                                                                                                                                      |             |                                                                      |
| Ali Akbar                    | Asadi-Pooya | Epilepsy Research Center, Shiraz University of Medical Sciences/Jefferson comprehensive epilepsy center, Thomas Jefferson University | Iran/USA    | Neurological/cognitive problems in long COVID                        |
| WHO                          |             |                                                                                                                                      |             |                                                                      |
| Wouter                       | de Groote   | WHO - Rehabilitation Team                                                                                                            | Switzerland | Global Health, Rehabilitation Medicine                               |
| Krutika                      | Kuppalli    | WHO                                                                                                                                  | Switzerland | Infectious Diseases, Global Health                                   |
| Nicoline                     | Schiess     | WHO - Brain Health Team                                                                                                              | Switzerland | Global health, Neurology                                             |
| Wilson Milton                | Were        | WHO                                                                                                                                  | Switzerland | Infectious Diseases, Global Health, Epidemiology                     |
| Janet Victoria               | Diaz        | WHO                                                                                                                                  | Switzerland | Critical Care, Pulmonary Medicine, Global Health                     |
